# Supplementary material for: Calcium‐Catalyzed Arene C−H Bond Activation by Low‐Valent AlI
Source: PubMed Central journal article supplement (PMC6856855; doi:10.1002/anie.201908978), 2019-09-13
Supplement: ANIE-58-15496-s001.pdf [file ANIE-58-15496-s001.pdf]

Supporting Information

**Calcium-Catalyzed Arene C–H Bond Activation by Low-Valent Al<sup>I</sup>**

*Steffen Brand, Holger Elsen, Jens Langer, Samuel Grams, and Sjoerd Harder\**

anie\_201908978\_sm\_miscellaneous\_information.pdf

# SUPPORTING INFORMATION

## Contents

|                                                                                                                                                           |            |
|-----------------------------------------------------------------------------------------------------------------------------------------------------------|------------|
| <b>1. Supporting Experimental Data</b>                                                                                                                    | <b>S1</b>  |
| 1.1. General Experimental Procedures                                                                                                                      | S1         |
| 1.2. Synthesis                                                                                                                                            | S1         |
| 1.3 NMR Spectra of Synthesized Compounds                                                                                                                  | S6         |
| 1.4 Catalysis                                                                                                                                             | S11        |
| 1.5 H/D Exchange Experiments                                                                                                                              | S12        |
| 1.6 Functionalization and Regeneration Cycle                                                                                                              | S14        |
| 1.7 Variable temperature <sup>1</sup> H NMR of [( <sup>D</sup> IPPBDI)CaH] <sub>2</sub> and ( <sup>D</sup> IPPBDI)Al in methylcyclohexane-d <sub>14</sub> | S15        |
| 1.8 Kinetic Studies by NMR Spectroscopy                                                                                                                   | S17        |
| 1.9 Single Crystal X-ray Diffraction                                                                                                                      | S19        |
| <b>2. Computational Details</b>                                                                                                                           | <b>S28</b> |
| <b>3. References</b>                                                                                                                                      | <b>S86</b> |

# 1. Supporting Experimental Data

## 1.1. General Experimental Procedures

All experiments were conducted under an inert nitrogen atmosphere using standard Schlenk and glovebox techniques (MBraun, Labmaster SP). Toluene, *n*-hexane and benzene were degassed with nitrogen, dried over activated aluminum oxide (Solvent Purification System: Pure Solv 400-4-MD, Innovative Technology) and stored over 3Å molecular sieves. *o*-, *m*-, *p*-Xylene, mesitylene and trimethyl(phenyl)silane were dried over calcium hydride, distilled under N<sub>2</sub> atmosphere and stored over molecular sieves 3Å. C<sub>6</sub>D<sub>6</sub>, methylcyclohexane-d<sub>14</sub> and toluene-d<sub>8</sub> were dried over 3Å molecular sieves. BDI-H (BDI = HC{(Me)CN(2,6-*i*Pr<sub>2</sub>C<sub>6</sub>H<sub>3</sub>)}<sub>2</sub>),<sup>[S1]</sup> (DIPPBDI)Al,<sup>[S2]</sup> [(DIPPBDI)CaH]<sub>2</sub>,<sup>[S3]</sup> (DIPPBDI)ZnH<sup>[S4]</sup> and [(DIPPBDI)MgH]<sub>2</sub><sup>[S5]</sup> were synthesized according to a literature procedure. NMR spectra were recorded with a Bruker Avance III HD 400 MHz or a Bruker Avance III HD 600 MHz spectrometer. The spectra were referenced to the respective residual signals of the deuterated solvents. Elemental analysis was performed with a Euro EA 3000 (Euro Vector) analyzer. All crystal structures have been measured on a SuperNova (Agilent) diffractometer with dual Cu and Mo microfocus sources and an Atlas S2 detector. GC/MS measurements were performed on a Thermo Scientific™ Trace™ 1310 gas chromatography system (carrier gas Helium) with detection by a Thermo Scientific™ ISQ™ LT Single Quadrupole mass spectrometer. A Phenomenex® Zebron™ ZB-5 column of the dimensions 0.25 mm x 30 m with a film thickness of 0.25 µm was used. The samples (1 µl) were injected with an Instant Connect-SSL Module in the split mode (Injector Temperature: 280 °C). Temperature programs were started at 40 °C followed by heating ramps, optimized for the separation problem, until 280°. Baseline separation of each analyte was achieved by choosing the different temperature programs. The molecular identity was confirmed by comparison with entries in the NIST/EPA/NIH mass spectral library (version 2.2, built June 10 2014).

## 1.2. Synthesis

### Synthesis of (DIPPBDI)Al(Ph)H

(DIPPBDI)Al (110.6 mg, 0.249 mmol) and [(DIPPBDI)CaH]<sub>2</sub> (11.3 mg, 12.3 µmol) were dissolved in 2 ml of benzene. The resulting orange red mixture was stirred at room temperature for one day. During this time the color of the solution changed to yellow. All volatiles were removed *in vacuo*. The resulting yellow foam was redissolved in a minimum amount of hexane (~500 µl) and crystallized at -30°C. The obtained yellow crystals were dried *in vacuo*. Yield: 67%,

87.6 mg, 0.168 mmol. The NMR data match those of material obtained by the literature known method.<sup>[S6]</sup>

<sup>1</sup>H NMR (400 MHz, C<sub>6</sub>D<sub>6</sub>, 298K): δ/ppm 7.36 (d, <sup>3</sup>J<sub>HH</sub> = 6.5 Hz, 2H, ArH), 7.21-7.00 (m, 9H, ArH, partly omitted by solvent signal), 4.98 (s, 1H, CH), 4.74 (bs, 1H, AlH), 3.63 (hept, <sup>3</sup>J<sub>HH</sub> = 6.6 Hz, 2H, CHMe<sub>2</sub>), 3.18 (hept, <sup>3</sup>J<sub>HH</sub> = 6.6 Hz, 2H, CHMe<sub>2</sub>), 1.63 (s, 6H, 2x CMe), 1.46 (d, <sup>3</sup>J<sub>HH</sub> = 6.7 Hz, 6H, CHMe<sub>2</sub>), 1.21 (d, <sup>3</sup>J<sub>HH</sub> = 6.8 Hz, 6H, CHMe<sub>2</sub>), 1.12 (d, <sup>3</sup>J<sub>HH</sub> = 6.8 Hz, 6H, CHMe<sub>2</sub>), 0.63 (d, <sup>3</sup>J<sub>HH</sub> = 6.7 Hz, 6H, CHMe<sub>2</sub>). <sup>13</sup>C{<sup>1</sup>H} NMR (101 MHz, C<sub>6</sub>D<sub>6</sub>, 298K): δ/ppm 170.6 (2x C(CMe)=NAr), 144.8 (2x C-Ar), 144.4 (2x C-Ar), 140.4 (2x C-Ar), 138.1 (2x CH-Ar), 127.9 (CH-Ar), 127.6 (2x CH-Ar), 127.1 (2x CH-Ar), 124.8 (2x CH-Ar), 124.7 (2x CH-Ar), 97.4 (CH), 28.9 (2x CHMe<sub>2</sub>), 28.6 (2x CHMe<sub>2</sub>), 25.4 (CHMe<sub>2</sub>), 24.7 (CHMe<sub>2</sub>), 24.7 (CHMe<sub>2</sub>), 24.1 (CHMe<sub>2</sub>), 23.3 (2x CMe). C<sub>ipso</sub> was not observed. <sup>27</sup>Al NMR (104 MHz, C<sub>6</sub>D<sub>6</sub>, 298K): δ/ppm not observed. Anal. Calcd. for C<sub>35</sub>H<sub>47</sub>AlN<sub>2</sub> (MW= 522.76 g/mol): C, 80.42; H, 9.06; N, 5.36. Found: C, 80.80; H, 9.48; N, 5.07.

### Synthesis of (<sup>DIPP</sup>BDI)Al(*m*-tolyl)H

(<sup>DIPP</sup>BDI)Al (58.8 mg, 0.132 mmol) and [(<sup>DIPP</sup>BDI)CaH]<sub>2</sub> (6.0 mg, 6.5 μmol) were dissolved in 2 ml of toluene. The resulting orange red mixture was stirred at room temperature for one day. During this time the color of the solution changed to yellow. All volatiles were removed *in vacuo*. The resulting yellow foam was redissolved in a minimum amount of hexane (~600 μl) and crystallized at -30°C. The obtained yellow crystals were dried *in vacuo*. Another batch of crystals could be obtained by reducing the volume of the mother liquor. Total yield: 61%, 42.8 mg, 0.080 mmol. The NMR data match those of material obtained by the literature known method.<sup>[S6]</sup>

<sup>1</sup>H NMR (400 MHz, C<sub>6</sub>D<sub>6</sub>, 298K): δ/ppm (only major isomer will be described) 7.18-7.13 (m, 4H, ArH, partly omitted by solvent signal), 7.08-6.92 (m, 6H, ArH), 4.97 (s, 1H, CH), 4.73 (bs, 1H, AlH), 3.63 (hept, <sup>3</sup>J<sub>HH</sub> = 6.8 Hz, 2H, CHMe<sub>2</sub>), 3.20 (hept, <sup>3</sup>J<sub>HH</sub> = 6.7 Hz, 2H, CHMe<sub>2</sub>), 2.04 (s, 3H, (CH<sub>3</sub>)C<sub>6</sub>H<sub>4</sub>), 1.63 (s, 6H, 2x CMe), 1.46 (d, <sup>3</sup>J<sub>HH</sub> = 6.8 Hz, 6H, CHMe<sub>2</sub>), 1.21 (d, <sup>3</sup>J<sub>HH</sub> = 6.9 Hz, 6H, CHMe<sub>2</sub>), 1.12 (d, <sup>3</sup>J<sub>HH</sub> = 6.9 Hz, 6H, CHMe<sub>2</sub>), 0.66 (d, <sup>3</sup>J<sub>HH</sub> = 6.7 Hz, 6H, CHMe<sub>2</sub>). <sup>13</sup>C{<sup>1</sup>H} NMR (101 MHz, C<sub>6</sub>D<sub>6</sub>, 298K): δ/ppm (only major isomer will be described) 170.5 (2x C(CMe)=NAr), 144.7 (2x C-Ar), 144.5 (2x C-Ar), 140.5 (2x C-Ar), 139.1 (CH-Ar), 135.4 (C-Ar), 135.2 (CH-Ar), 128.4 (CH-Ar, omitted by solvent signal), 127.5 (2x CH-Ar), 127.0 (CH-Ar), 124.8 (2x CH-Ar), 124.7 (2x CH-Ar), 97.4 (CH), 28.8 (2x CHMe<sub>2</sub>), 28.7 (2x CHMe<sub>2</sub>), 25.5 (CHMe<sub>2</sub>), 24.7 (CHMe<sub>2</sub>), 24.7 (CHMe<sub>2</sub>), 24.0 (CHMe<sub>2</sub>), 23.3 (2x CMe), 21.6 ((Me)C<sub>6</sub>H<sub>4</sub>). C<sub>ipso</sub> was not observed. <sup>27</sup>Al NMR (104 MHz, C<sub>6</sub>D<sub>6</sub>, 298K): δ/ppm not observed. Anal. Calcd. for C<sub>36</sub>H<sub>49</sub>AlN<sub>2</sub> (MW= 536.78 g/mol): C, 80.55; H, 9.20; N, 5.22. Found: C, 80.48; H, 9.27; N, 4.94.

### Synthesis of (<sup>DIPP</sup>BDI)Al(2,5-dimethylphenyl)H

(<sup>DIPP</sup>BDI)Al (108.0 mg, 0.243 mmol) and [(<sup>DIPP</sup>BDI)CaH]<sub>2</sub> (11.0 mg, 12.0 μmol) were dissolved in 2 ml of toluene. The resulting orange red mixture was stirred at room temperature for one day. During this time the color of the solution changed to yellow. All volatiles were removed *in vacuo*. The resulting yellow foam was redissolved in a minimum amount of hexane (~800 μl) and crystallized at -30°C. The obtained yellow crystals were dried *in vacuo*. Another batch of crystals could be obtained by reducing the volume of the mother liquor. Total yield: 69%, 92.2 mg, 0.167 mmol. The NMR data match those of material obtained by the literature known method.<sup>[S6]</sup>

<sup>1</sup>H NMR (400 MHz, C<sub>6</sub>D<sub>6</sub>, 298K): δ/ppm 7.50 (s, 1H, ArH), 7.15-7.07 (m, 5H, ArH), 7.01-6.95 (m, 3H, ArH), 4.97 (s, 1H, CH), 4.60 (bs, 1H, AlH), 3.58 (hept, <sup>3</sup>J<sub>HH</sub> = 6.8 Hz, 2H, CHMe<sub>2</sub>), 3.14 (hept, <sup>3</sup>J<sub>HH</sub> = 6.7 Hz, 2H, CHMe<sub>2</sub>), 2.63 (s, 3H, (CH<sub>3</sub>)C<sub>6</sub>H<sub>3</sub>(CH<sub>3</sub>)), 1.97 (s, 3H, (CH<sub>3</sub>)C<sub>6</sub>H<sub>3</sub>(CH<sub>3</sub>)), 1.56 (s, 6H, 2x CMe), 1.50 (d, <sup>3</sup>J<sub>HH</sub> = 6.8 Hz, 6H, CHMe<sub>2</sub>), 1.19 (d, <sup>3</sup>J<sub>HH</sub> = 6.9 Hz, 6H, CHMe<sub>2</sub>), 1.11 (d, <sup>3</sup>J<sub>HH</sub> = 6.9 Hz, 6H, CHMe<sub>2</sub>), 0.43 (d, <sup>3</sup>J<sub>HH</sub> = 6.7 Hz, 6H, CHMe<sub>2</sub>). <sup>13</sup>C{<sup>1</sup>H} NMR (101 MHz, C<sub>6</sub>D<sub>6</sub>, 298K): δ/ppm 170.2 (2x C(CMe)=NAr), 145.5 (2x C-Ar), 144.1 (2x C-Ar), 142.3 (C-Ar), 140.9 (CH-Ar), 140.3 (2x C-Ar), 132.7 (C-Ar), 129.1 (CH-Ar), 128.7 (CH-Ar), 127.6 (2x CH-Ar), 124.9 (2x CH-Ar), 124.7 (2x CH-Ar), 97.6 (CH), 29.1 (2x CHMe<sub>2</sub>), 28.0 (2x CHMe<sub>2</sub>), 25.8 ((Me)C<sub>6</sub>H<sub>3</sub>(Me)), 25.1 (CHMe<sub>2</sub>), 24.9 (CHMe<sub>2</sub>), 24.8 (CHMe<sub>2</sub>), 24.0 (CHMe<sub>2</sub>), 23.4 (2x CMe), 20.9 ((Me)C<sub>6</sub>H<sub>3</sub>(Me)). C<sub>ipso</sub> was not observed. <sup>27</sup>Al NMR (104 MHz, C<sub>6</sub>D<sub>6</sub>, 298K): δ/ppm not observed. Anal. Calcd. for C<sub>37</sub>H<sub>51</sub>AlN<sub>2</sub> (MW= 550.81 g/mol): C, 80.68; H, 9.33; N, 5.09. Found: C, 80.37; H, 9.39; N, 4.97.

### Synthesis of (<sup>DIPP</sup>BDI)Al(H)Zn(<sup>DIPP</sup>BDI)

(<sup>DIPP</sup>BDI)Al (95.3 mg, 0.214 mmol) and (<sup>DIPP</sup>BDI)ZnH (104.5 mg, 0.216 mmol) were dissolved in 5 ml of benzene. The resulting orange red mixture was stirred at room temperature overnight. During this time the color of the solution changed to yellow. All volatiles were removed *in vacuo*. The resulting yellow residue was redissolved in 7 ml of toluene, layered with hexane and stored at -30°C. The obtained yellow crystals were dried *in vacuo*. These crystals contained one molecule of co-crystallized toluene and were used for elemental analysis but were not sufficient for X-ray analysis. The solvent free product could be obtained by redissolving these crystals in benzene and removing all volatiles *in vacuo* in 82% yield (164.1 mg, 176.7 μmol). Crystals suitable for X-ray analysis could be obtained by storing a saturated solution of [(<sup>DIPP</sup>BDI)Al(H)Zn(<sup>DIPP</sup>BDI)] in hexane at -30°C.

<sup>1</sup>H NMR (600 MHz, C<sub>6</sub>D<sub>6</sub>, 298K): δ/ppm 7.31 (dd, <sup>3</sup>J<sub>HH</sub> = 7.6 Hz, <sup>4</sup>J<sub>HH</sub> = 1.5 Hz, 1H, ArH), 7.26-7.18 (m, 3H, ArH), 7.15-7.00 (m, 6H, ArH), 6.93 (dd, <sup>3</sup>J<sub>HH</sub> = 7.3 Hz, <sup>4</sup>J<sub>HH</sub> = 1.7 Hz, 1H, ArH), 6.86 (dd, <sup>3</sup>J<sub>HH</sub> = 7.0 Hz, <sup>4</sup>J<sub>HH</sub> = 1.9 Hz, 1H, ArH), 4.92 (s, 1H, CH), 4.66 (s, 1H, CH), 4.20 (bs, 1H, AlH), 4.04 (hept, <sup>3</sup>J<sub>HH</sub> = 6.9 Hz, 1H, CHMe<sub>2</sub>), 3.62-3.49 (m, 3H, 3x CHMe<sub>2</sub>), 3.26 (hept,

$^3J_{HH} = 6.6$  Hz, 1H,  $CHMe_2$ ), 3.09 (hept,  $^3J_{HH} = 6.7$  Hz, 1H,  $CHMe_2$ ), 2.83 (hept,  $^3J_{HH} = 6.8$  Hz, 1H,  $CHMe_2$ ), 2.77 (hept,  $^3J_{HH} = 6.8$  Hz, 1H,  $CHMe_2$ ), 1.79 (s, 3H,  $CMe$ ), 1.74 (d,  $^3J_{HH} = 6.9$  Hz, 3H,  $CHMe_2$ ), 1.60 (s, 3H,  $CMe$ ), 1.47 (d,  $^3J_{HH} = 6.9$  Hz, 3H,  $CHMe_2$ ), 1.44 (d,  $^3J_{HH} = 6.9$  Hz, 3H,  $CHMe_2$ ), 1.42 (s, 3H,  $CMe$ ), 1.40 (d,  $^3J_{HH} = 6.8$  Hz, 3H,  $CHMe_2$ ), 1.36 (d,  $^3J_{HH} = 6.8$  Hz, 3H,  $CHMe_2$ ), 1.32 (s, 3H,  $CMe$ ), 1.29 (d,  $^3J_{HH} = 6.8$  Hz, 3H,  $CHMe_2$ ), 1.27 (d,  $^3J_{HH} = 6.8$  Hz, 3H,  $CHMe_2$ ), 1.21 (d,  $^3J_{HH} = 6.7$  Hz, 3H,  $CHMe_2$ ), 1.17 (d,  $^3J_{HH} = 6.9$  Hz, 3H,  $CHMe_2$ ), 1.15 (d,  $^3J_{HH} = 6.8$  Hz, 3H,  $CHMe_2$ ), 1.07 (d,  $^3J_{HH} = 7.0$  Hz, 3H,  $CHMe_2$ ), 1.04 (d,  $^3J_{HH} = 6.7$  Hz, 3H,  $CHMe_2$ ), 1.01 (d,  $^3J_{HH} = 6.8$  Hz, 3H,  $CHMe_2$ ), 0.61 (d,  $^3J_{HH} = 6.9$  Hz, 3H,  $CHMe_2$ ), 0.52 (d,  $^3J_{HH} = 6.8$  Hz, 3H,  $CHMe_2$ ), 0.47 (d,  $^3J_{HH} = 6.8$  Hz, 3H,  $CHMe_2$ ).  $^{13}C\{^1H\}$  NMR (151 MHz,  $C_6D_6$ , 298K):  $\delta$ /ppm 169.3, 169.3, 165.6, 165.1, 147.4, 145.6, 145.4, 145.3, 144.8, 144.4 (2x), 143.6, 142.0, 141.9, 141.0, 140.3, 128.6, 127.3, 126.9, 125.3, 125.0, 125.0, 124.8, 124.8, 124.6, 124.5, 124.1, 123.7, 122.7, 97.5, 97.2, 29.1, 28.7, 28.6, 28.3, 28.3, 28.2, 27.9, 27.9, 27.1, 26.4, 26.2, 25.6, 25.3, 25.2, 25.2, 25.1, 25.0, 25.0, 25.0, 24.4, 24.1, 24.0, 23.9 (2x), 23.6, 23.2, 22.9.  $^{27}Al$  NMR (156 MHz,  $C_6D_6$ , 298K):  $\delta$ /ppm not observed. Anal. Calcd. for  $C_{65}H_{91}AlN_4Zn$  (MW = 1020.83 g/mol): C, 76.48; H, 8.99; N, 5.49. Found: C, 76.94; H, 8.99; N, 5.13.

### Synthesis of $(^{DIPP}BDI)Al(H)Mg(^{DIPP}BDI)$

$(^{DIPP}BDI)Al$  (84.3 mg, 0.190 mmol) and  $[(^{DIPP}BDI)MgH]_2$  (84.2 mg, 0.95 mmol) were suspended in 1 ml of benzene. The resulting orange red mixture was stirred at room temperature overnight. During this time all solid dissolved and the color of the solution changed to dark red. All volatiles were removed *in vacuo*. The resulting yellow residue was redissolved in 0.5 ml of toluene, layered with hexane and stored at  $-30^\circ C$  for several days. The obtained red crystals were dried *in vacuo*. These crystals contained one molecule of co-crystallized toluene. The solvent free product could be obtained by dissolving these crystals in benzene and removing all volatiles *in vacuo* in 15% yield (24.7 mg, 27.8 mmol). Crystals suitable for x-ray analysis could be obtained by storing a saturated solution of  $(^{DIPP}BDI)Al(H)Mg(^{DIPP}BDI)$  in hexane at  $-30^\circ C$ .

$^1H$  NMR (600 MHz,  $C_6D_6$ , 258K):  $\delta$ /ppm 7.27-7.18 (m, 5H,  $ArH$ ), 7.10 – 7.07 (m, 1H), 7.00-6.96 (m, 2H,  $ArH$ ), 6.90 (d,  $^3J_{HH} = 7.4$  Hz, 1H,  $ArH$ ), 6.84 (t,  $^3J_{HH} = 7.6$  Hz, 1H,  $ArH$ ), 6.80 (d,  $^3J_{HH} = 7.5$  Hz, 1H,  $ArH$ ), 6.76 (d,  $^3J_{HH} = 7.4$  Hz, 1H,  $ArH$ ), 4.90-4.76 (m, 2H,  $CH$ ,  $AlH$ ), 4.56 (s, 1H,  $CH$ ), 3.86-3.74 (m, 2H, 2x  $CHMe_2$ ), 3.66-3.56 (m, 2H, 2x  $CHMe_2$ ), 3.24 (hept,  $^3J_{HH} = 6.6$  Hz, 1H,  $CHMe_2$ ), 3.15-3.05 (m, 2H, 2x  $CHMe_2$ ), 2.87 (hept,  $^3J_{HH} = 6.6$  Hz, 1H,  $CHMe_2$ ), 1.80 (d,  $^3J_{HH} = 6.7$  Hz, 3H,  $CHMe_2$ ), 1.71 (s, 3H,  $CMe$ ), 1.56 (d,  $^3J_{HH} = 6.8$  Hz, 3H,  $CHMe_2$ ), 1.48 (d,  $^3J_{HH} = 6.5$  Hz, 3H,  $CHMe_2$ ), 1.45 (s, 3H,  $CMe$ ), 1.42 (d,  $^3J_{HH} = 6.7$  Hz, 3H,  $CHMe_2$ ), 1.39 (s, 3H,  $CMe$ ), 1.35 (d,  $^3J_{HH} = 6.4$  Hz, 6H, 2x  $CHMe_2$ ), 1.30 (s, 3H,  $CMe$ ), 1.24-1.20 (m, 9H, 3x  $CHMe_2$ ), 1.12 (d,  $^3J_{HH} = 6.9$  Hz, 3H,  $CHMe_2$ ), 1.08 (d,  $^3J_{HH} = 6.7$  Hz, 3H,  $CHMe_2$ ), 1.05

(d,  $^3J_{HH} = 6.7$  Hz, 3H, CHMe<sub>2</sub>), 1.00 (d,  $^3J_{HH} = 6.8$  Hz, 3H, CHMe<sub>2</sub>), 0.83 (d,  $^3J_{HH} = 7.7$  Hz, 3H, CHMe<sub>2</sub>), 0.81 (d,  $^3J_{HH} = 7.2$  Hz, 3H, CHMe<sub>2</sub>), 0.63 (d,  $^3J_{HH} = 6.6$  Hz, 3H, CHMe<sub>2</sub>). <sup>13</sup>C{<sup>1</sup>H} NMR (151 MHz, C<sub>6</sub>D<sub>6</sub>, 258K): δ/ppm 168.7, 168.2, 168.1, 168.1, 146.6, 145.7, 144.9 (2x), 144.8, 144.7, 143.6, 143.5, 142.8, 142.1, 141.4, 141.3, 127.2, 127.1, 126.1, 125.8, 125.6, 125.3, 124.9, 124.8, 124.7, 124.4, 124.3, 123.7, 97.1, 97.0, 30.1, 29.1, 29.0, 29.0, 28.9, 28.8, 28.8, 28.7, 28.4, 28.0, 27.7, 26.3, 25.9, 25.6, 25.6 (2x), 25.5, 25.5, 25.4, 25.3, 24.9, 24.9, 24.7, 24.6, 24.1, 24.0, 23.8, 23.6. <sup>27</sup>Al NMR (156 MHz, C<sub>6</sub>D<sub>6</sub>, 258K): δ/ppm not observed. Anal. Calcd. for C<sub>65</sub>H<sub>91</sub>AlMgN<sub>4</sub> (MW= 979.76 g/mol): C, 79.68; H, 9.36; N, 5.72. Found: C, 79.39; H, 9.48; N, 5.39.

### 1.3. NMR Spectra of Synthesized Compounds

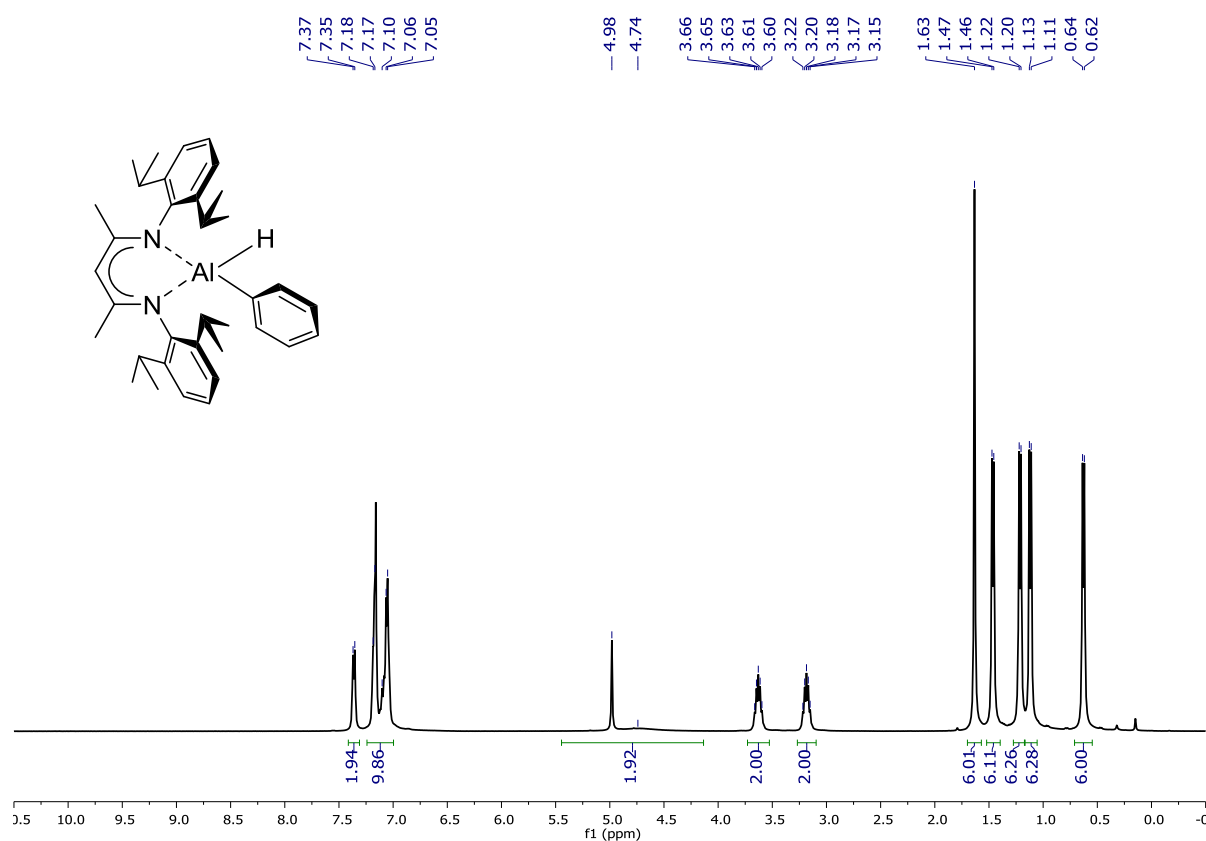

Figure S1:  $^1\text{H}$  NMR spectrum of  $(\text{DIPPBdi})\text{Al}(\text{Ph})\text{H}$  in  $\text{C}_6\text{D}_6$  at 298 K.

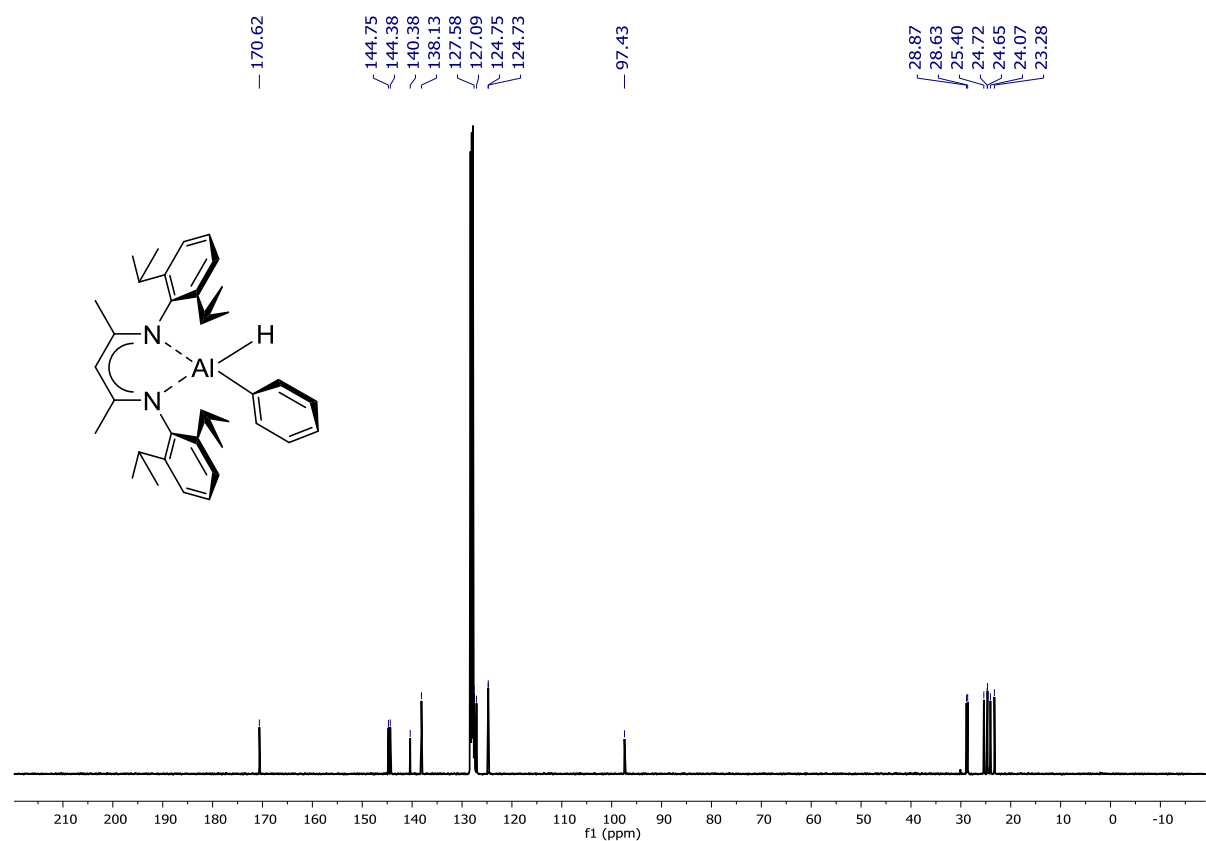

Figure S2:  $^{13}\text{C}\{^1\text{H}\}$  NMR spectrum of  $(\text{DIPPBdi})\text{Al}(\text{Ph})\text{H}$  in  $\text{C}_6\text{D}_6$  at 298 K.



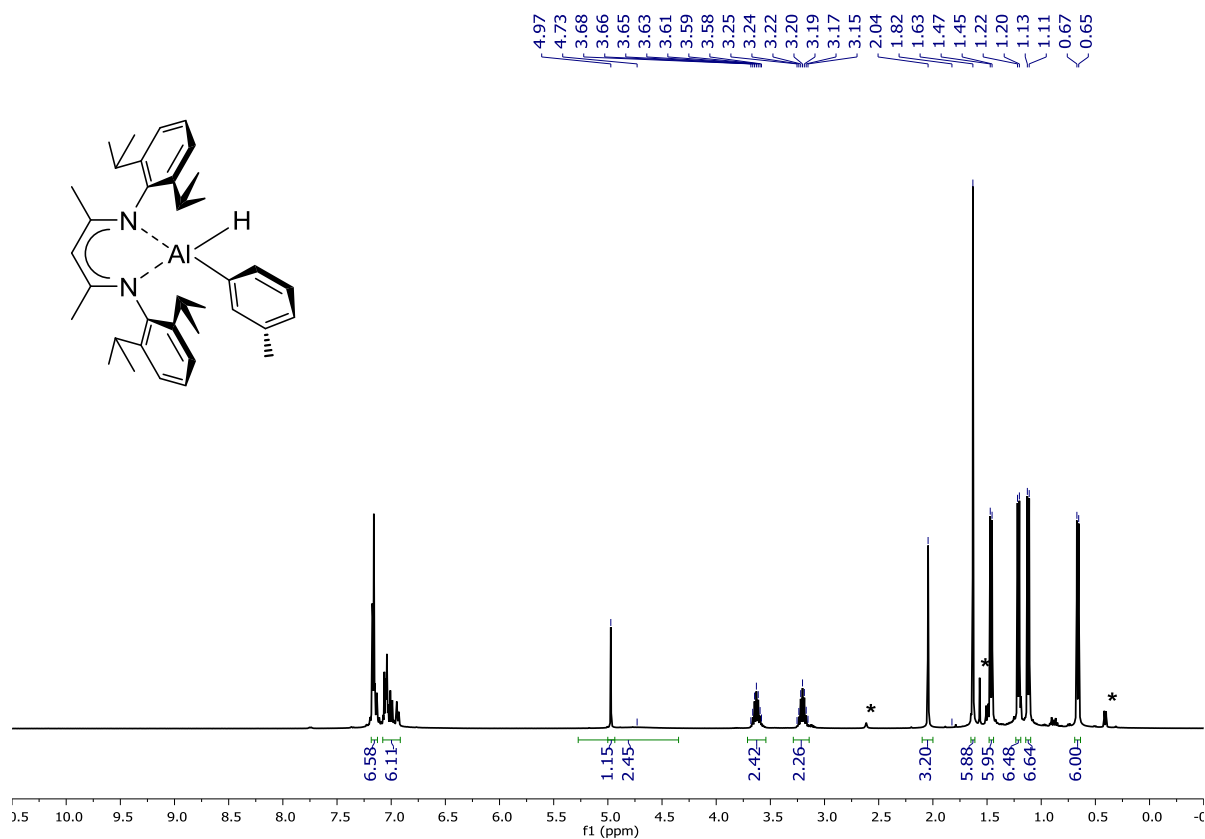

**Figure S3:**  $^1\text{H}$  NMR spectrum of  $(\text{DIPPBDI})\text{Al}(\text{m-tolyl})\text{H}$  in  $\text{C}_6\text{D}_6$  at 298 K. \* indicates small amounts of the *o*-tolyl impurity.

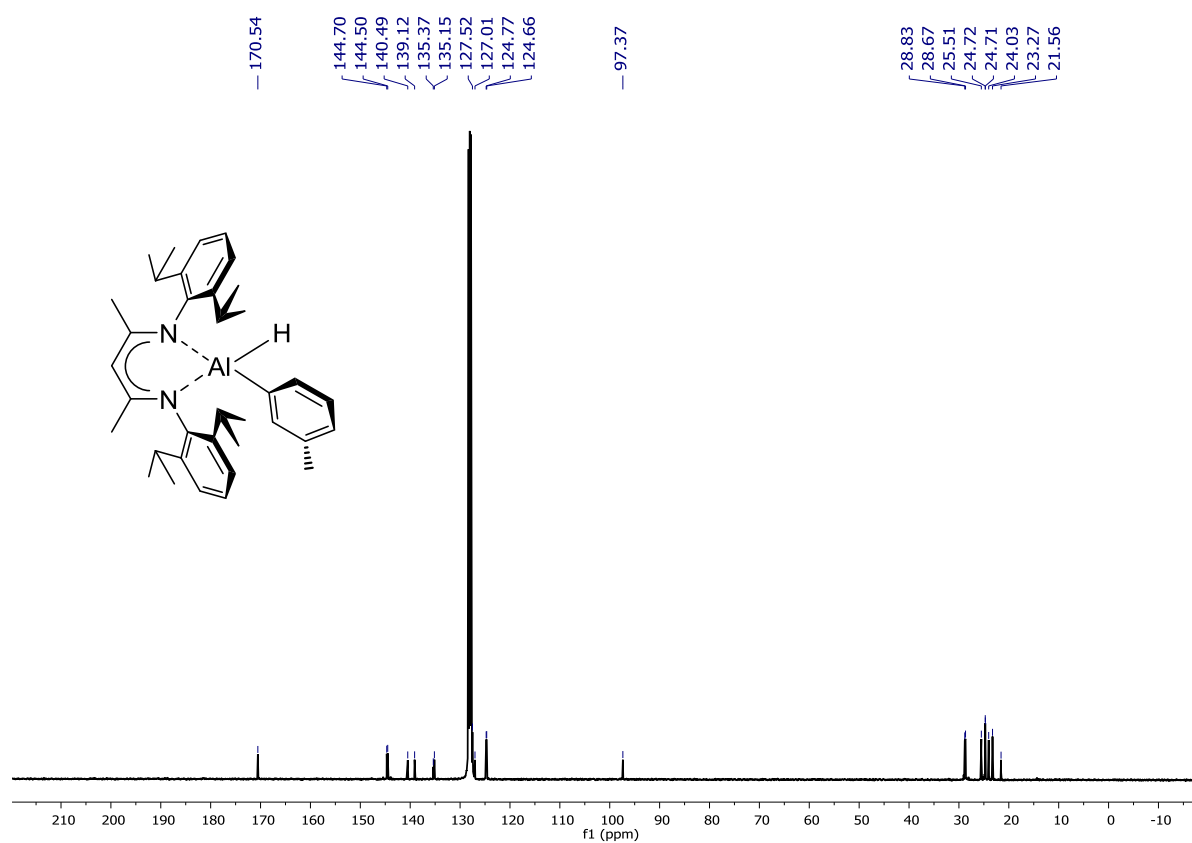

**Figure S4:**  $^{13}\text{C}\{^1\text{H}\}$  NMR spectrum of  $(\text{DIPPBDI})\text{Al}(\text{m-tolyl})\text{H}$  in  $\text{C}_6\text{D}_6$  at 298 K.

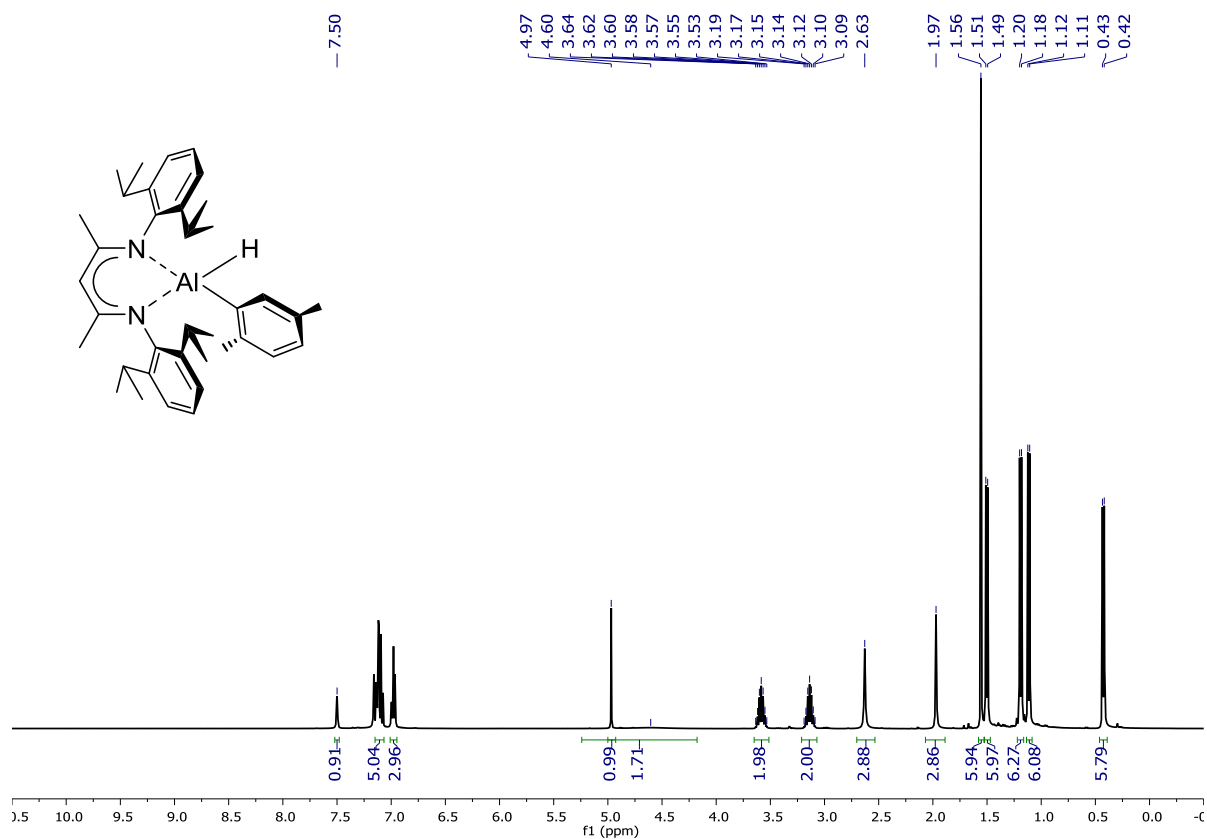

**Figure S5:**  $^1\text{H}$  NMR spectrum of  $(\text{DIPPBDI})\text{Al}(\text{2,5-dimethylphenyl})\text{H}$  in  $\text{C}_6\text{D}_6$  at 298 K.

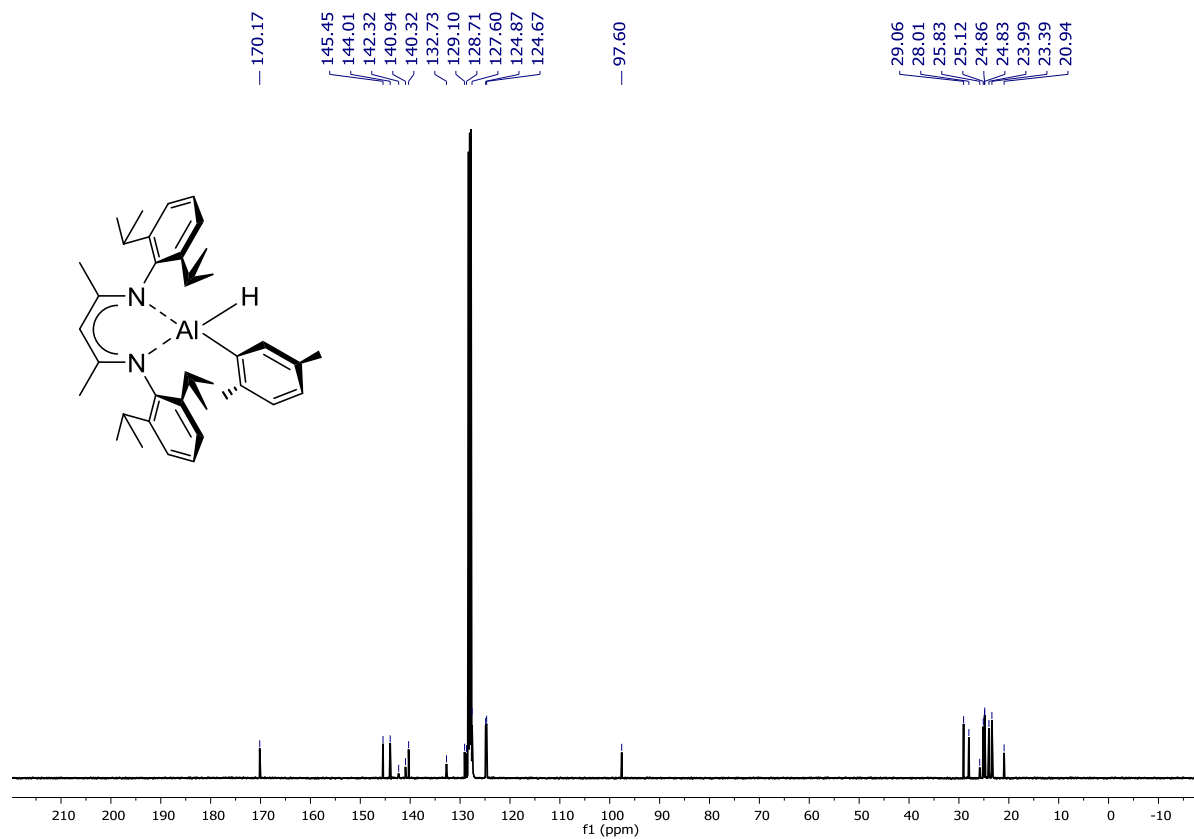

**Figure S6:**  $^{13}\text{C}\{^1\text{H}\}$  NMR spectrum of  $(\text{DIPPBDI})\text{Al}(\text{2,5-dimethylphenyl})\text{H}$  in  $\text{C}_6\text{D}_6$  at 298 K.

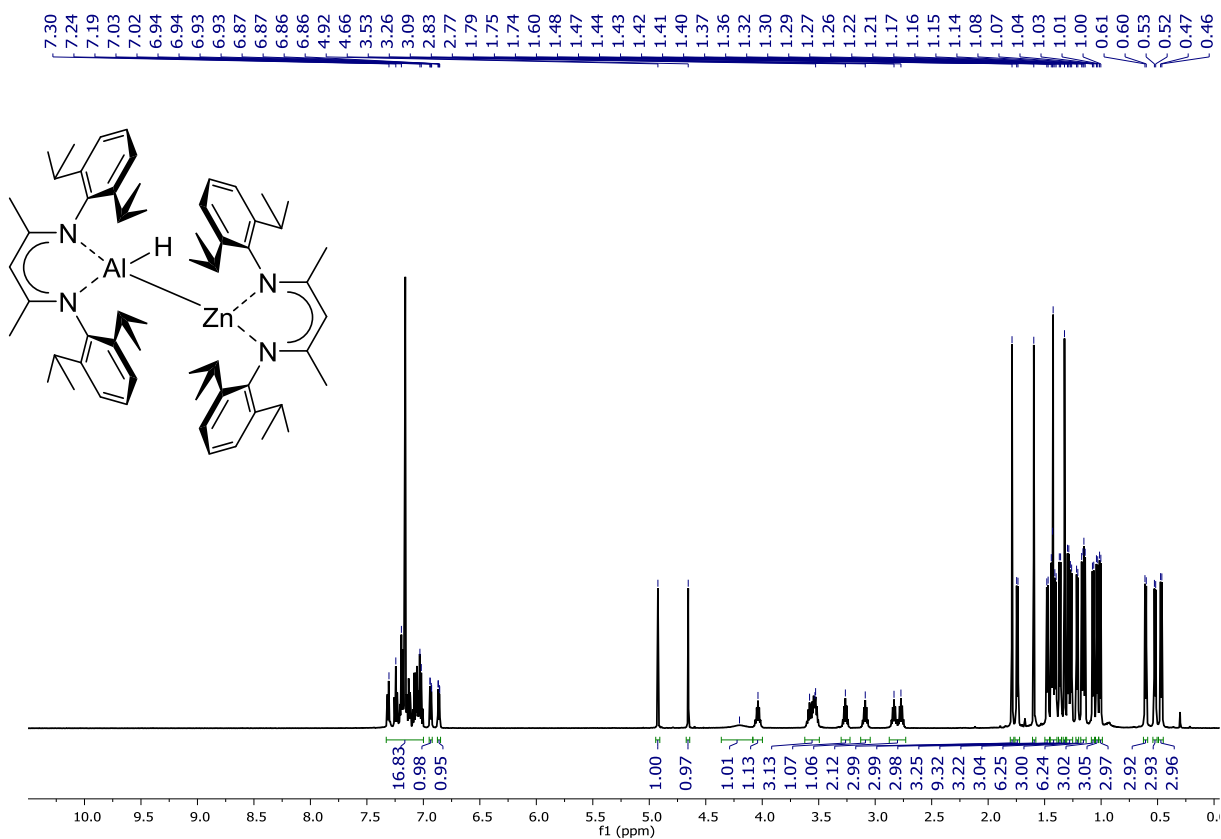

Figure S7:  $^1\text{H}$  NMR spectrum of  $(\text{DIPPBDI})\text{Al}(\text{H})\text{Zn}(\text{DIPPBDI})$  in  $\text{C}_6\text{D}_6$  at 298 K.

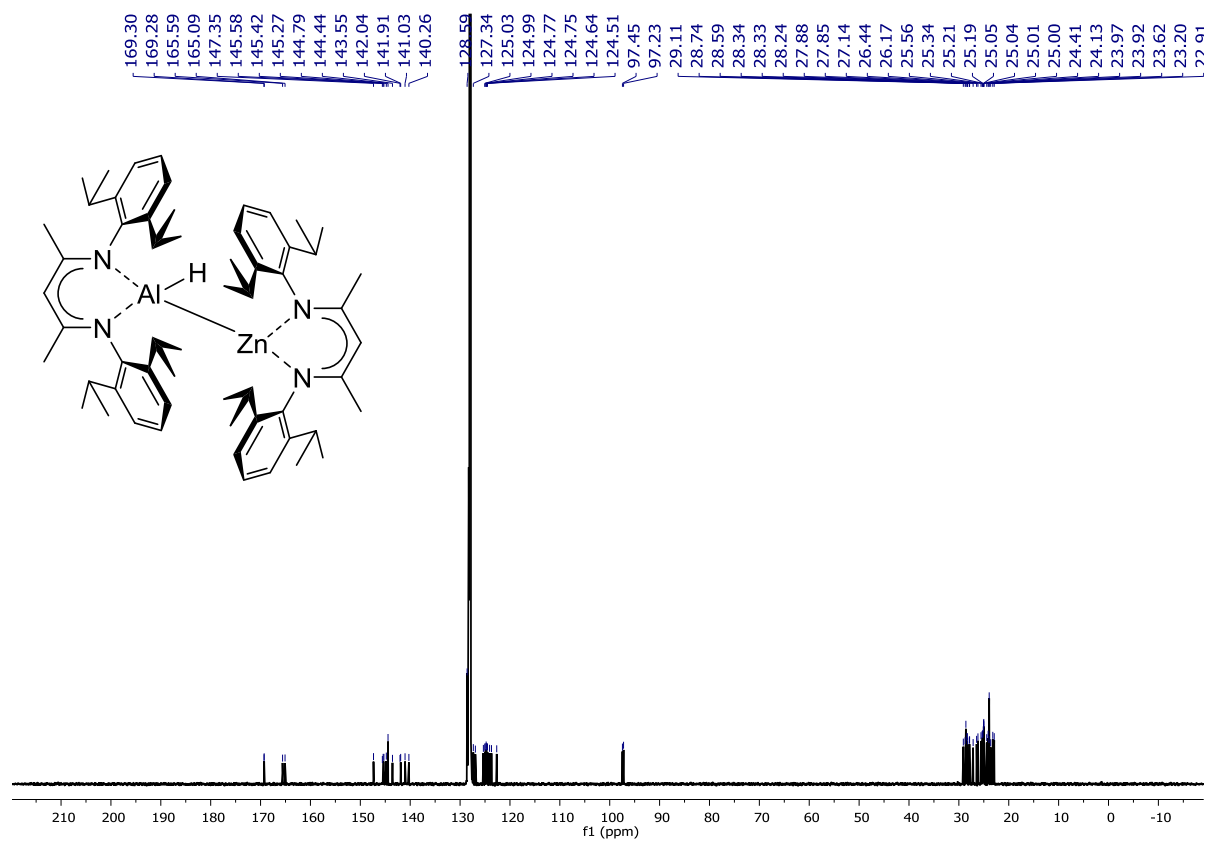

Figure S8:  $^{13}\text{C}\{^1\text{H}\}$  NMR spectrum of  $(\text{DIPPBDI})\text{Al}(\text{H})\text{Zn}(\text{DIPPBDI})$  in  $\text{C}_6\text{D}_6$  at 298 K.

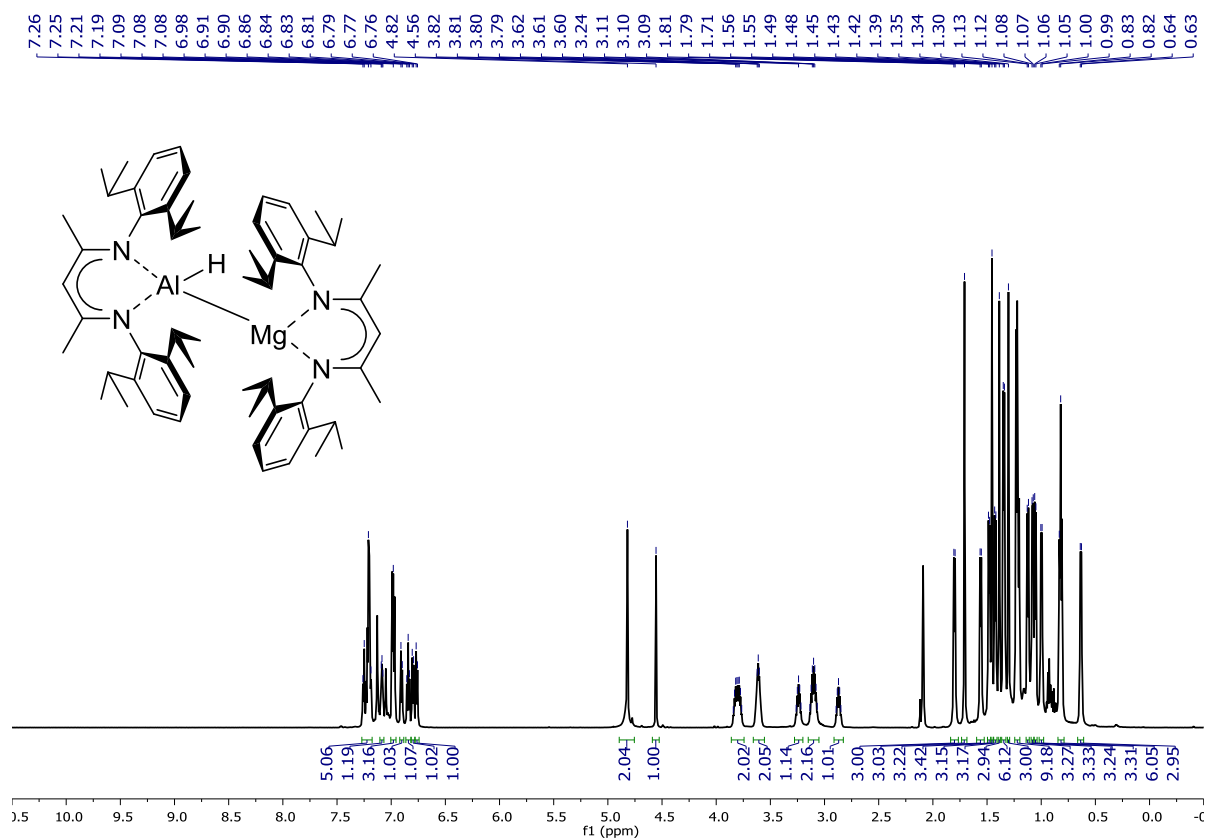

**Figure S9:**  $^1\text{H}$  NMR spectrum of  $(\text{DIPPBDI})\text{Al}(\text{H})\text{Mg}(\text{DIPPBDI})$  in toluene- $d_8$  at 258 K.

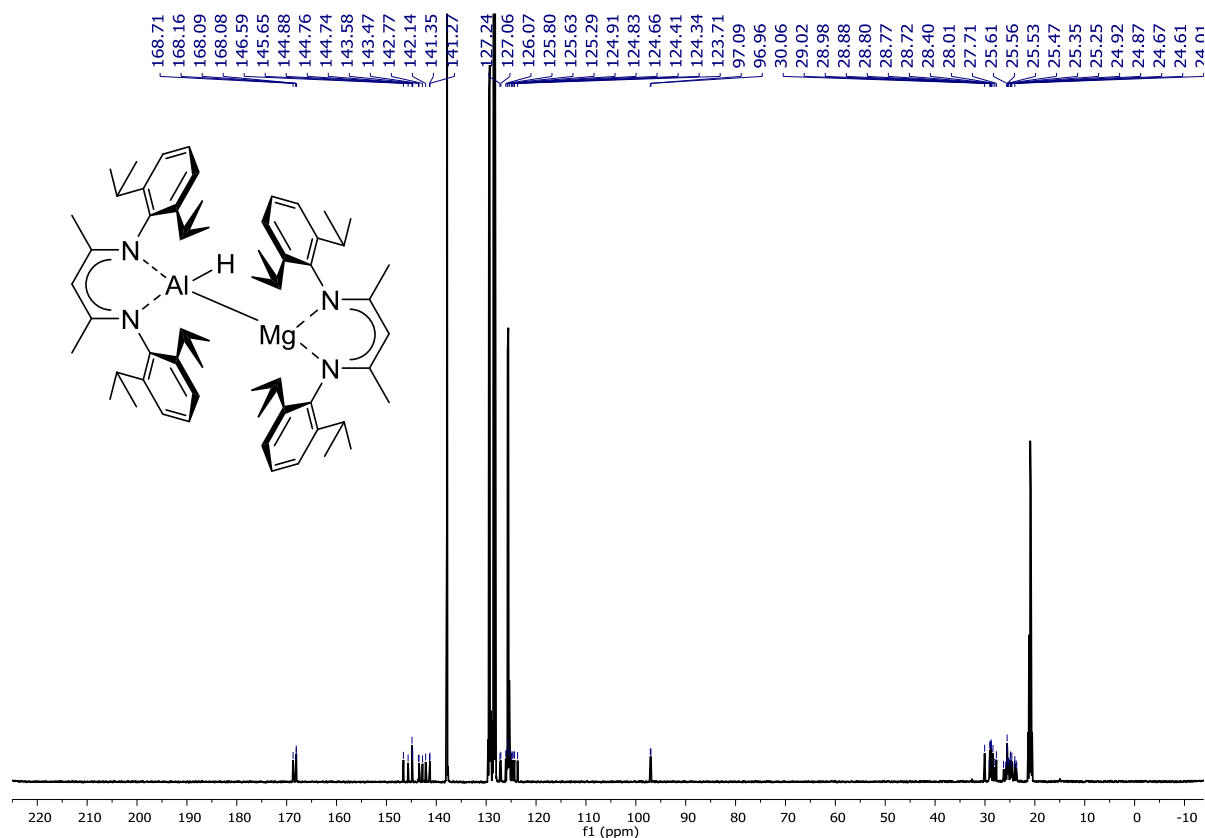

**Figure S10:**  $^{13}\text{C}$  NMR spectrum of  $(\text{DIPPBDI})\text{Al}(\text{H})\text{Mg}(\text{DIPPBDI})$  in toluene- $d_8$  at 258 K.

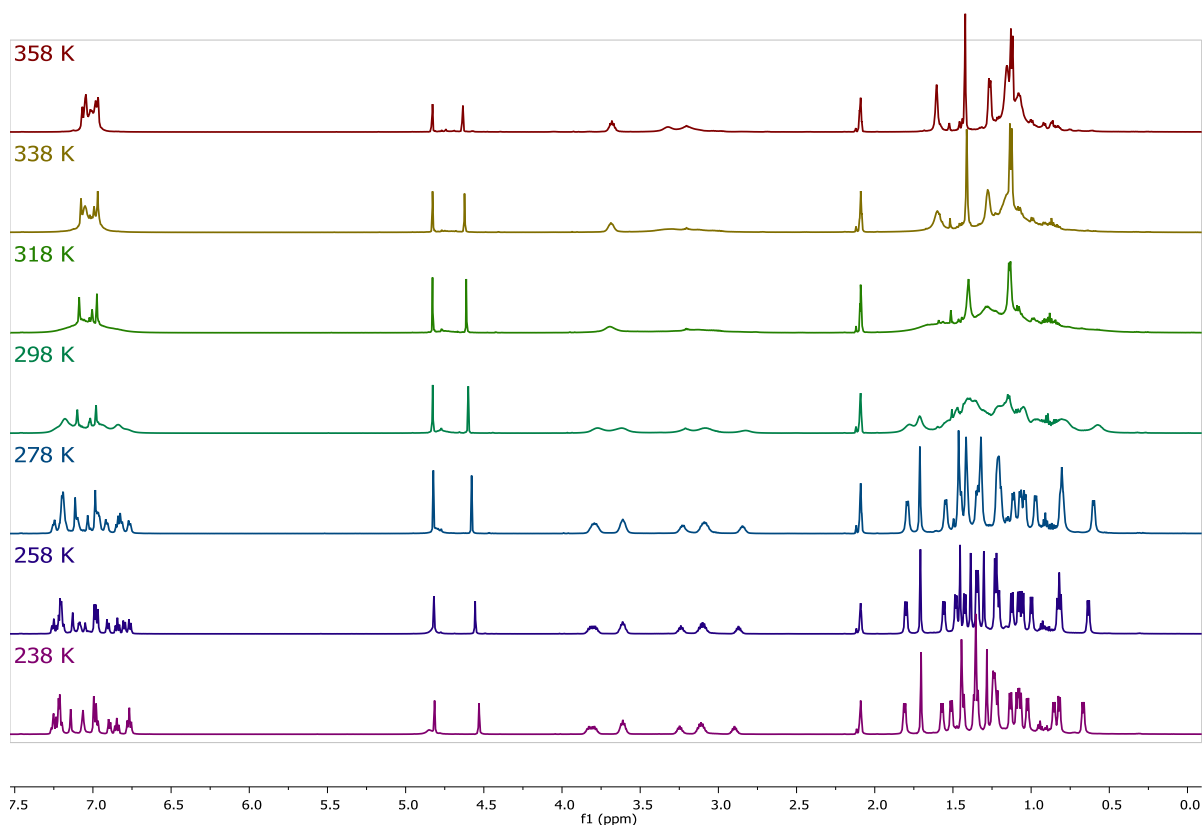

**Figure S11:** Variable temperature  $^1\text{H}$  NMR of  $(^{\text{DIPP}}\text{BDI})\text{Al}(\text{H})\text{Mg}(^{\text{DIPP}}\text{BDI})$  in toluene- $\text{d}_8$ .

## 1.4 Catalysis

10.9 mM stock solutions of  $[(^{\text{DIPP}}\text{BDI})\text{CaH}]_2$  in the dry substrates were prepared (substrates were used as solvent). The desired quantity of the  $[(^{\text{DIPP}}\text{BDI})\text{CaH}]_2$  catalyst stock solution (2.5 mol%: 46.4  $\mu\text{L}$ , 5 mol%: 92.8  $\mu\text{L}$ , 7.5 mol%: 139.3  $\mu\text{L}$ ) was added to a solution of  $(^{\text{DIPP}}\text{BDI})\text{Al}$  (9.0 mg, 20.2  $\mu\text{mol}$ ) in the substrate used as a solvent (2.5 mol%: 454  $\mu\text{L}$ , 5 mol%: 407  $\mu\text{L}$ , 7.5 mol%: 361  $\mu\text{L}$ ). The reaction was followed by proton NMR in 30 min intervals.

## 1.5 H/D Exchange Experiments

A solution of  $(^{\text{DIPP}}\text{BDI})\text{Al}(\text{C}_6\text{D}_5)\text{D}$  (7.0 mg, 0.013 mmol) and  $[(^{\text{DIPP}}\text{BDI})\text{CaH}]_2$  (0.7 mg, 0.002 mmol) in 0.5 ml  $\text{C}_6\text{H}_6$  were heated to  $60^\circ\text{C}$  for 3.5 days. The reaction was followed by  $^1\text{H}$  and  $^2\text{D}$  NMR spectroscopy. A control experiment without  $[(^{\text{DIPP}}\text{BDI})\text{CaH}]_2$  was done under the same conditions and also followed by  $^1\text{H}$  and  $^2\text{D}$  NMR spectroscopy.

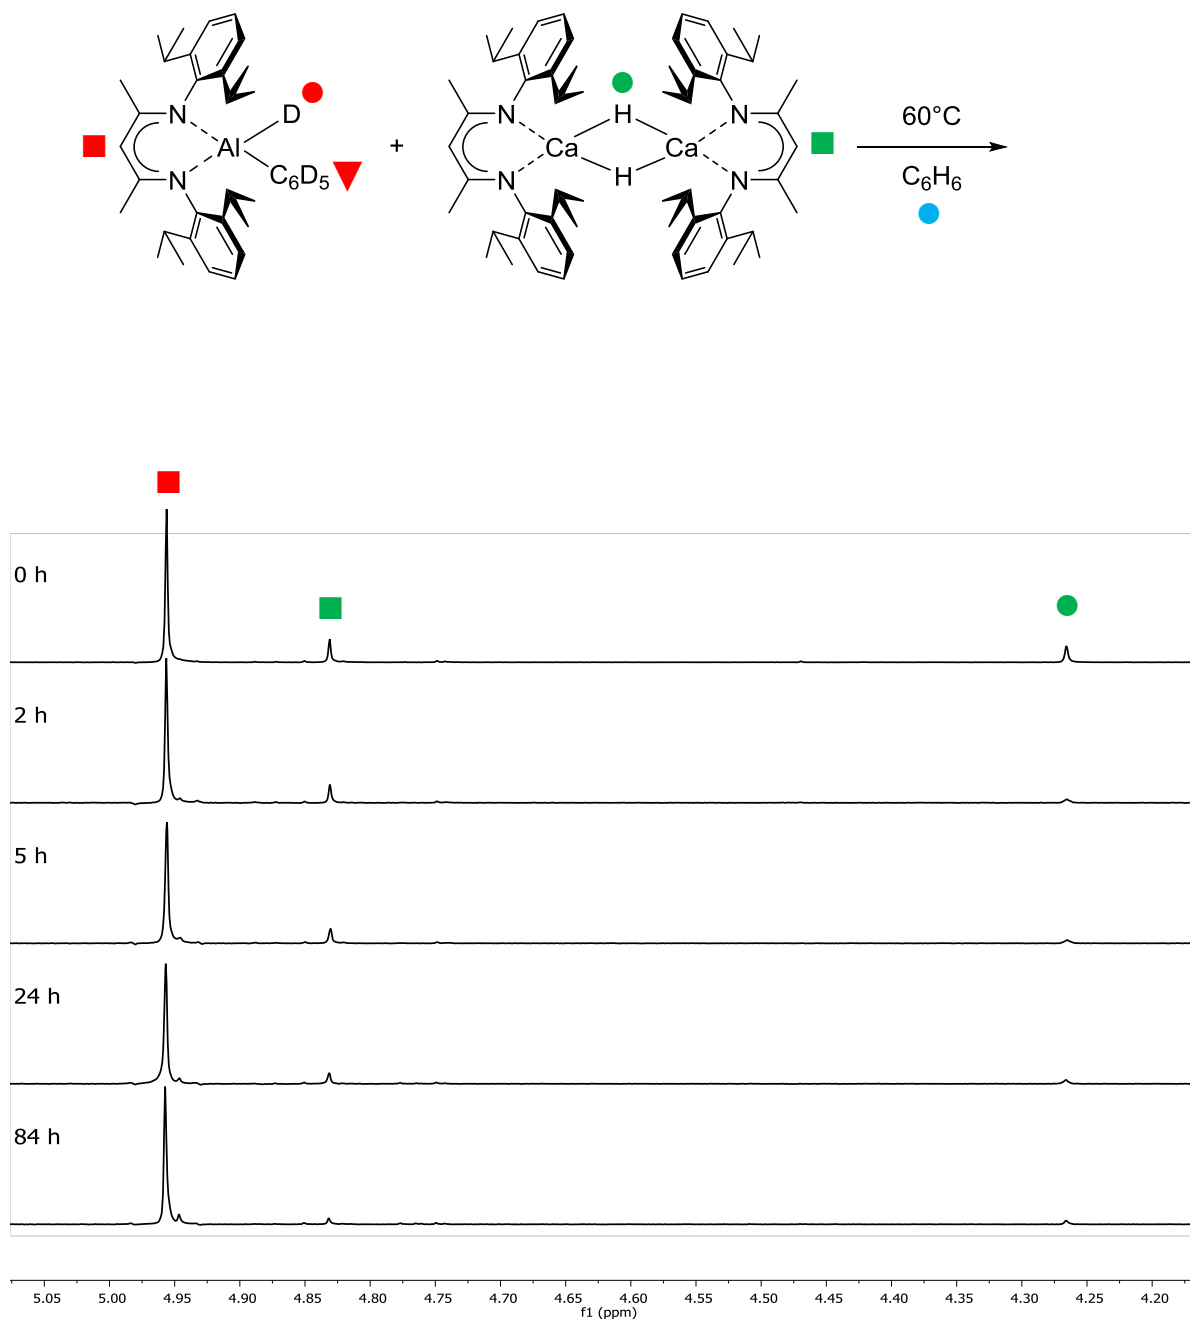

**Figure S12:**  $^1\text{H}$  NMR spectra of  $(^{\text{DIPP}}\text{BDI})\text{Al}(\text{C}_6\text{D}_5)\text{D}$  and  $[(^{\text{DIPP}}\text{BDI})\text{CaH}]_2$  in  $\text{C}_6\text{H}_6$ .

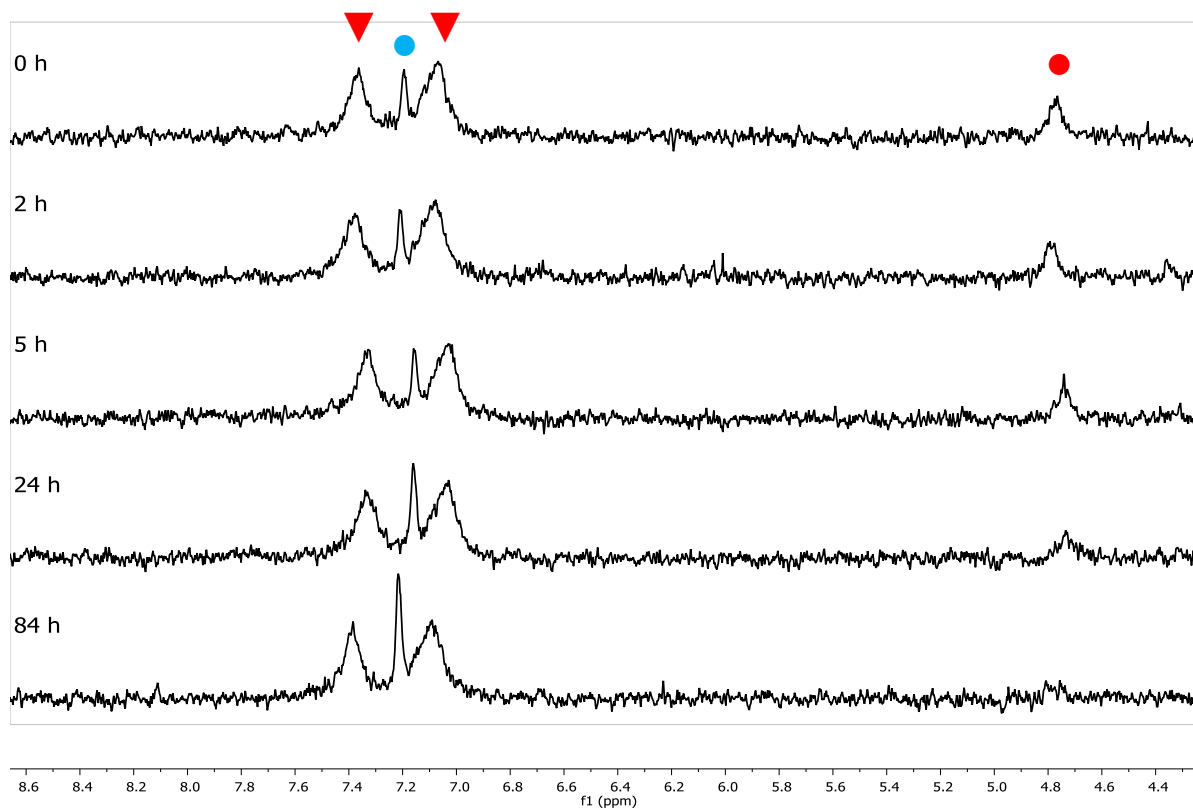

**Figure S13:**  $^2\text{D}$  NMR spectra of  $(\text{D}^{15}\text{PBDI})\text{Al}(\text{C}_6\text{D}_5)\text{D}$  and  $[(\text{D}^{15}\text{PBDI})\text{CaH}]_2$  in  $\text{C}_6\text{H}_6$  (with natural abundance of D).

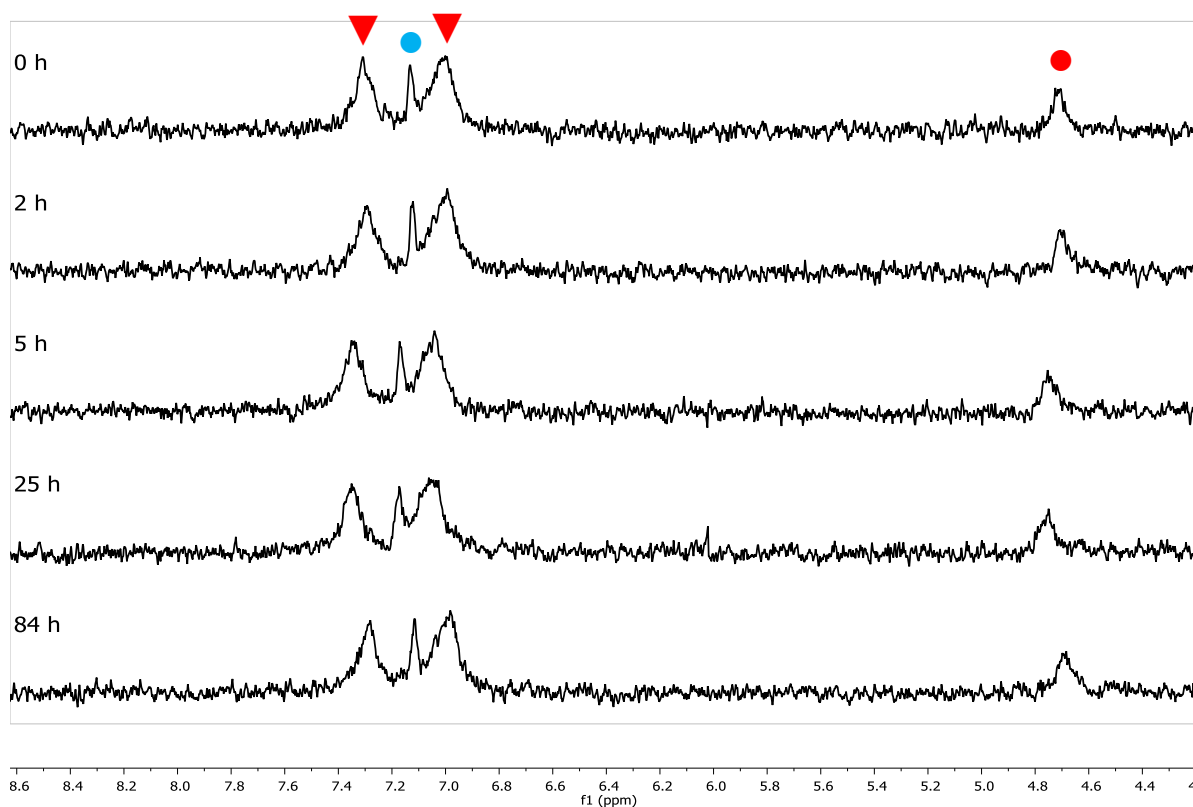

**Figure S14:**  $^2\text{D}$  NMR spectra of  $(\text{D}^{15}\text{PBDI})\text{Al}(\text{C}_6\text{D}_5)\text{D}$  in  $\text{C}_6\text{H}_6$  (with natural abundance of D).

## 1.6 Functionalization and Regeneration Cycle

Solid (<sup>D</sup>I<sup>P</sup>PBDI)Al(*m*-tolyl)H (3.8 mg, 0.007 mmol) was carefully placed in a J. Young-tube with a solution of I<sub>2</sub> (3.6 mg, 0.014 mmol) in 0.5 ml C<sub>6</sub>D<sub>6</sub> and the tube was sealed before both components were mixed. Upon mixing an evolution of gas was observed and a <sup>1</sup>H NMR spectrum was recorded after 10 min. The sample was then heated to reflux for 24 h and another <sup>1</sup>H NMR was measured. Comparison of the chemical shifts showed the formation of (<sup>D</sup>I<sup>P</sup>PBDI)AlI<sub>2</sub> and *m*-tolyl iodide. The latter was also identified by GC/MS analysis.

***m*-Tolyl iodide.** GC–MS (EI-MS, 70eV): *m/z* (%): RT: 6.57 min: 218.02 (49) [M<sup>+</sup>], 91.11 (100), 65.10 (52).

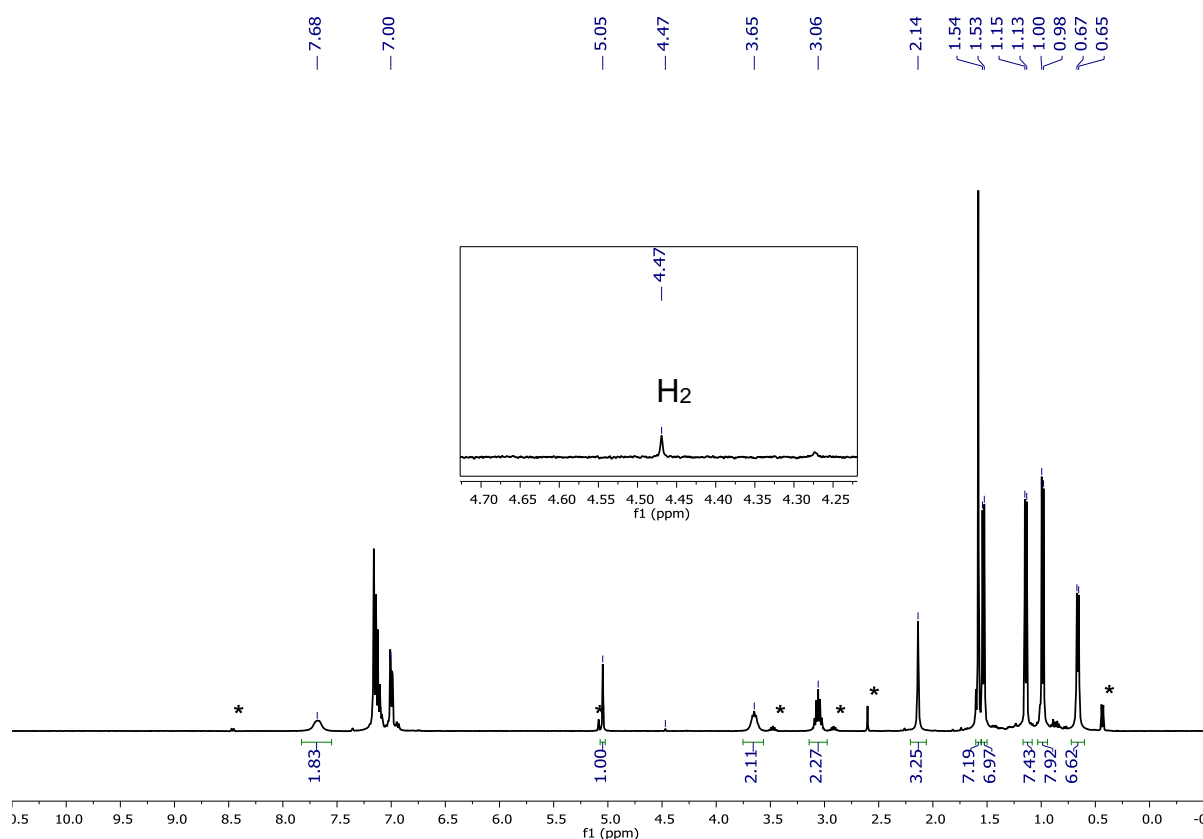

**Figure S15:** <sup>1</sup>H NMR spectrum 10 min after the addition of (<sup>D</sup>I<sup>P</sup>PBDI)Al(*m*-tolyl)H to I<sub>2</sub> in C<sub>6</sub>D<sub>6</sub>. \* indicates small amounts of the *o*-tolyl impurity. Clean conversion to (<sup>D</sup>I<sup>P</sup>PBDI)Al(*m*-tolyl)I is observed.



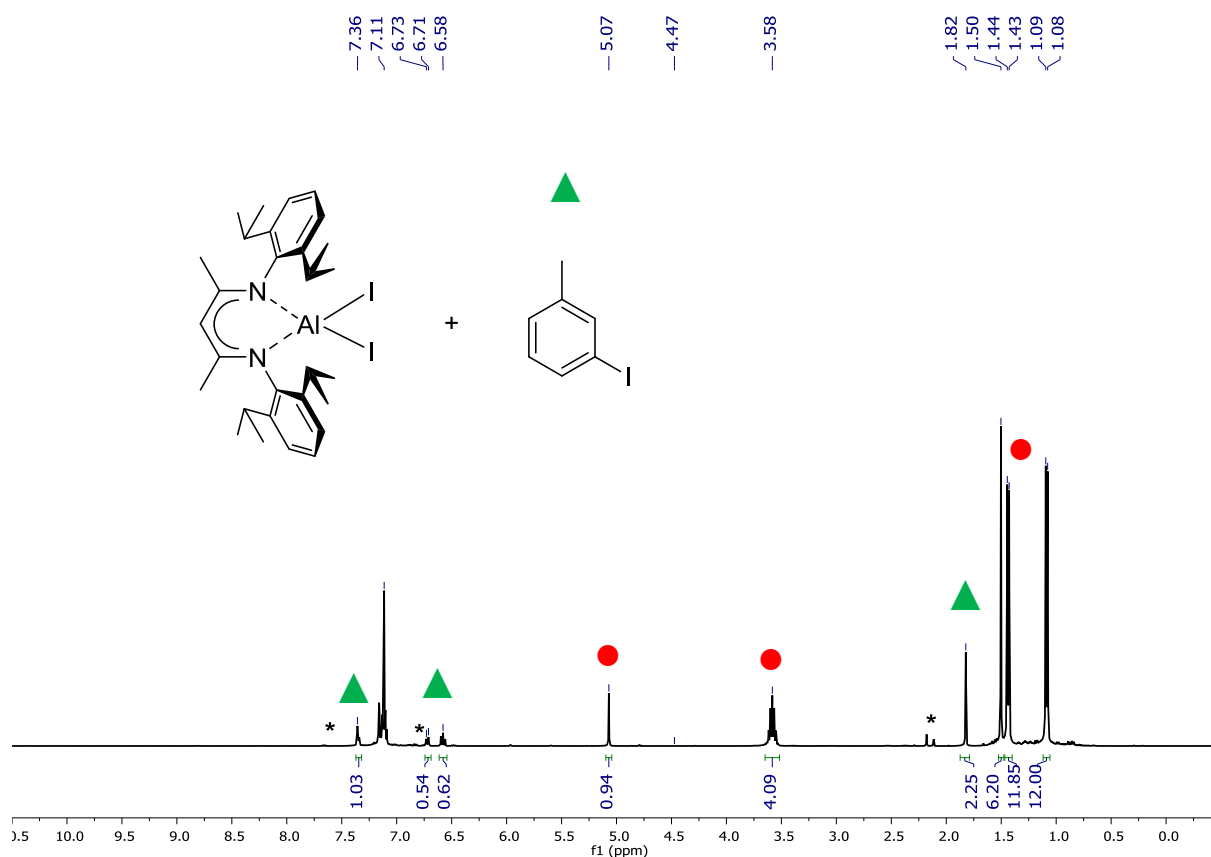

**Figure S16:**  $^1\text{H}$  NMR spectrum after 24 h in refluxing  $\text{C}_6\text{D}_6$ . The complex  $(\text{DIPPBDI})\text{Al}(m\text{-tolyl})\text{I}$  is fully converted to  $(\text{DIPPBDI})\text{AlI}_2$ . \* indicates small amounts of the *o*-tolyl impurity.

### 1.7 Variable temperature $^1\text{H}$ NMR of $[(\text{DIPPBDI})\text{CaH}]_2$ and $(\text{DIPPBDI})\text{Al}$ in methylcyclohexane- $\text{d}_{14}$

$[(\text{DIPPBDI})\text{CaH}]_2$  (1.5 mg, 1.6  $\mu\text{mol}$ ) and  $(\text{DIPPBDI})\text{Al}$  (1.4 mg, 3.1  $\mu\text{mol}$ ) were dissolved in 0.5 mL methylcyclohexane- $\text{d}_{14}$  and a  $^1\text{H}$  NMR spectrum of the resulting mixture was recorded at room temperature. The sample was then cooled to 223 K and another  $^1\text{H}$  NMR was measured. The sample was then allowed to warm to room temperature and another  $^1\text{H}$  NMR spectrum was recorded.

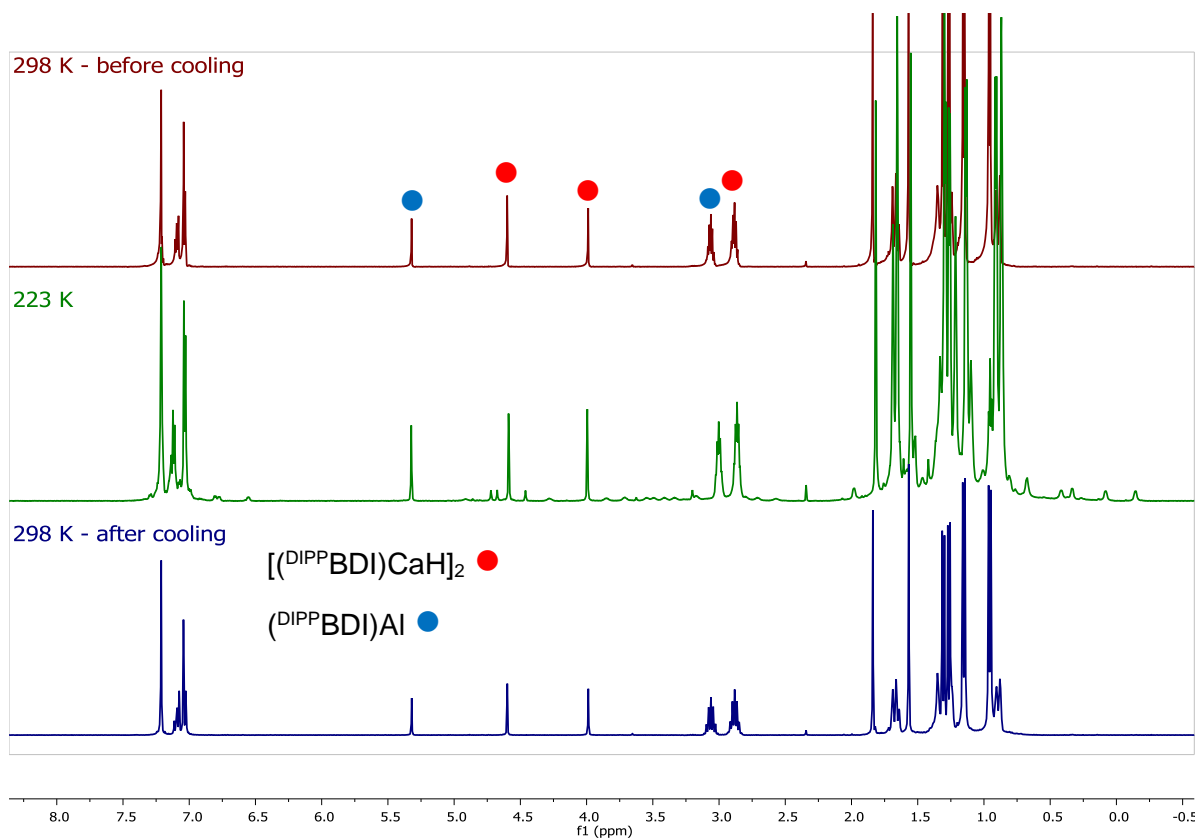

**Figure S17:** Variable temperature  $^1\text{H}$  NMR of  $(\text{DIPPBDI})\text{Al}$  and  $[(\text{DIPPBDI})\text{CaH}]_2$  in methylcyclohexane- $\text{d}_{14}$ .

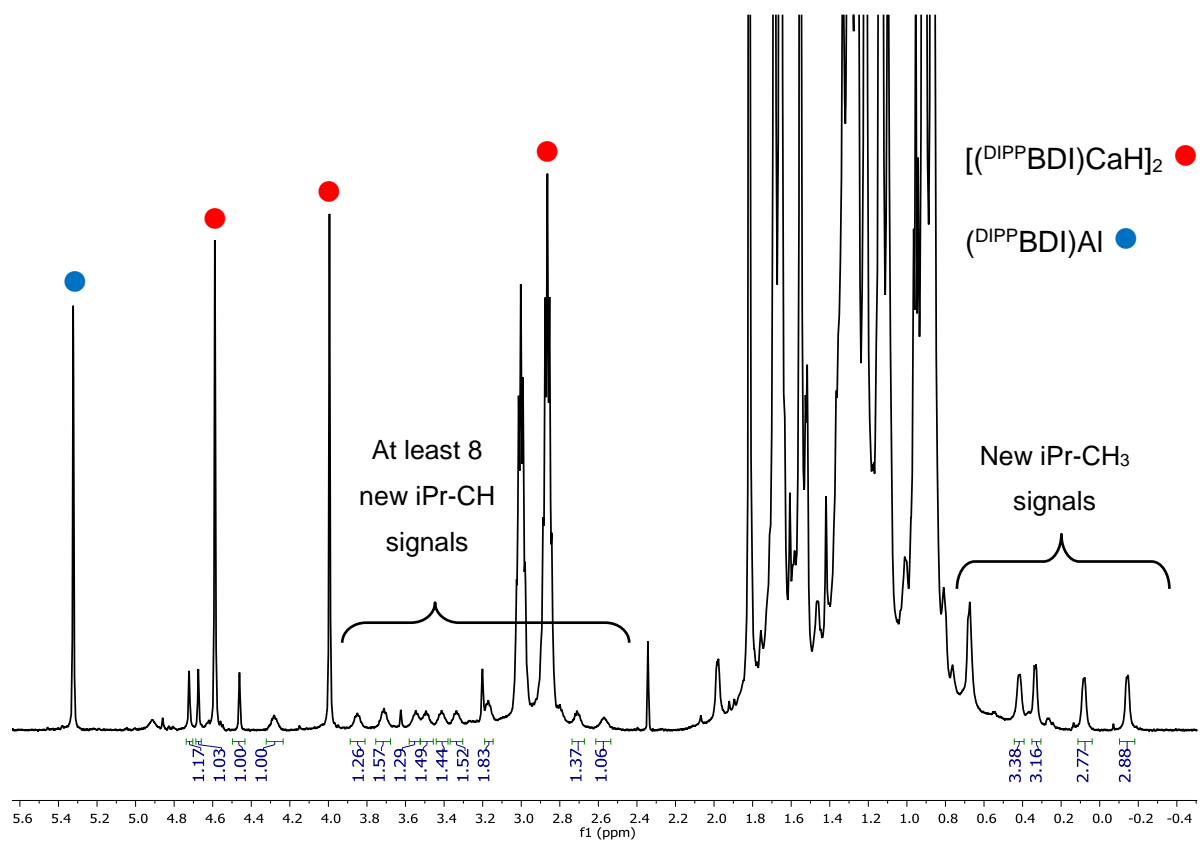

**Figure S18:**  $^1\text{H}$  NMR spectrum of  $(\text{DIPPBDI})\text{Al}$  and  $[(\text{DIPPBDI})\text{CaH}]_2$  in methylcyclohexane- $\text{d}_{14}$  at 223 K.

## 1.8 Kinetic Studies by NMR Spectroscopy

A 10.9 mM stock solution of  $[(^{\text{DIP}}\text{BDI})\text{CaH}]_2$  in dry  $\text{C}_6\text{H}_6$  was prepared. A quantity of 53.7  $\mu\text{l}$  of the  $[(^{\text{DIP}}\text{BDI})\text{CaH}]_2$  stock solution was added to a solution  $(^{\text{DIP}}\text{BDI})\text{Al}$  (5.2 mg, 11.7  $\mu\text{mol}$ ) in  $\text{C}_6\text{H}_6$  (446  $\mu\text{l}$ ) and thoroughly mixed. The mixture was then transferred to a J. Young NMR tube containing a capillary insert standard (trimethyl(phenyl)silane in  $\text{C}_6\text{D}_6$ ). The sealed tube was transported to the NMR spectrometer and the first proton NMR spectrum was recorded circa 5 min after mixing. The reaction was followed by proton NMR in 30 min steps at 25°C.

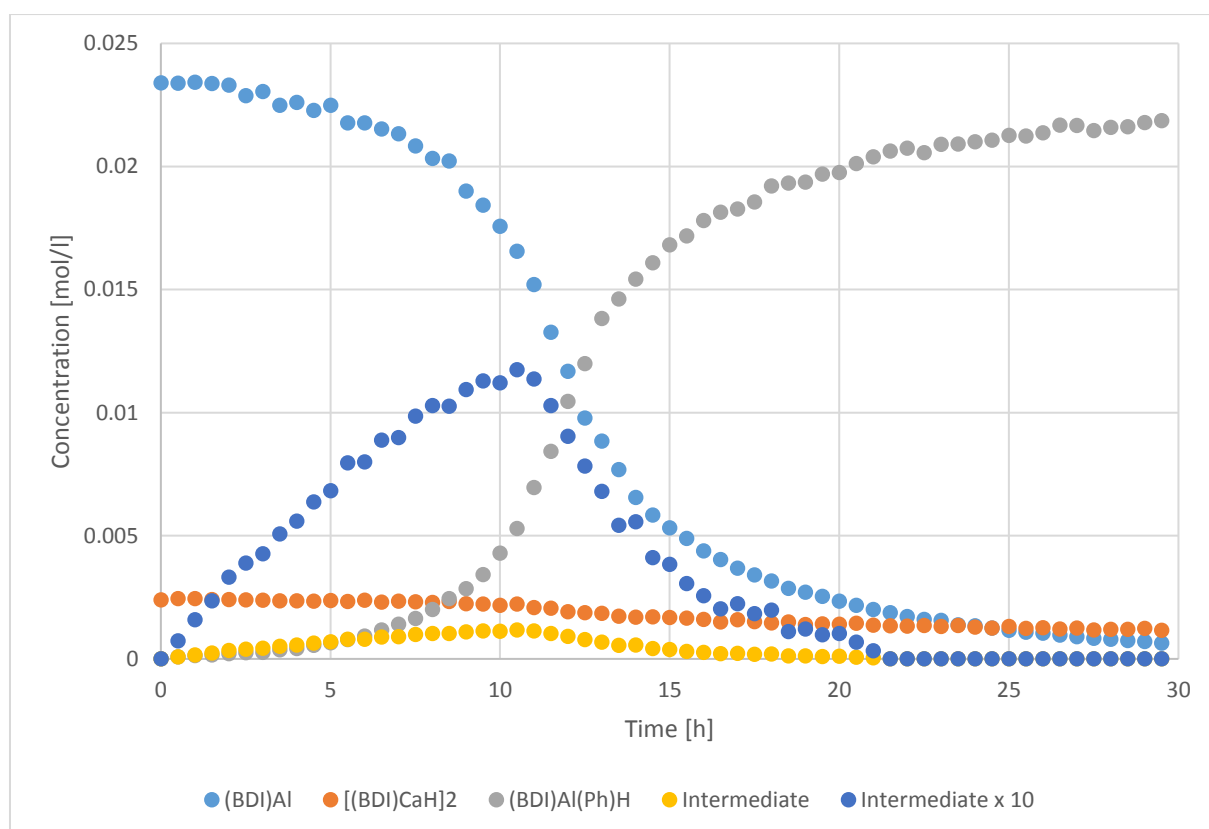

**Figure S19:** Conversion vs. time plot for the  $[(^{\text{DIP}}\text{BDI})\text{CaH}]_2$  catalyzed reaction of  $(^{\text{DIP}}\text{BDI})\text{Al}$  with benzene at 20 °C. Intermediate x 10 represents the intermediate concentration multiplied by a factor of 10.

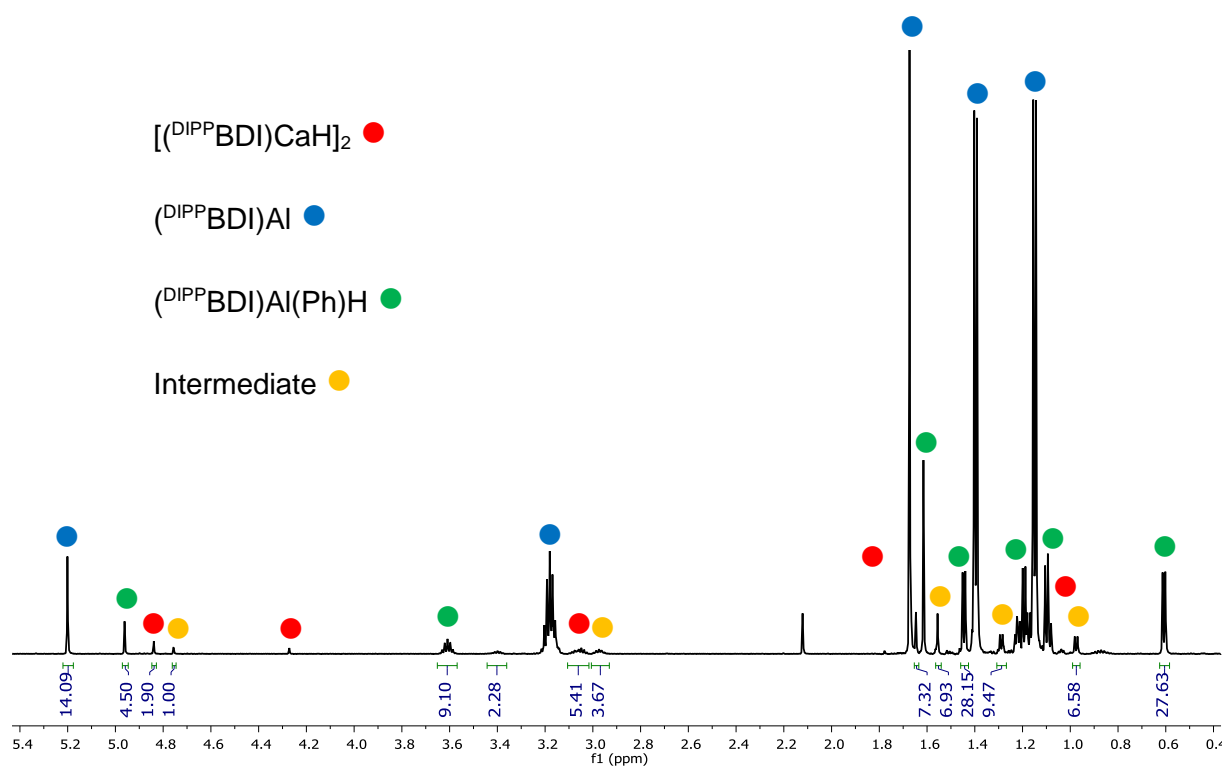

**Figure S20:**  $^1\text{H}$  NMR spectrum of the reaction mixture 10.5 h for the  $[(\text{DIPPBdi})\text{CaH}]_2$  catalyzed reaction of  $(\text{DIPPBdi})\text{Al}$  with benzene at  $20\text{ }^\circ\text{C}$ .

## 1.9 Single Crystal X-Ray Diffraction

### Structure Determination of (DIPPBDI)Al(Ph)H

A colorless crystal of (DIPPBDI)Al(Ph)H was embedded in inert perfluoropolyalkylether (viscosity 1800 cSt; ABCR GmbH) and mounted using a Hampton Research CryoLoop. The crystal was then flash cooled to 100.0(1) K in a nitrogen gas stream and kept at this temperature during the experiment. The crystal structure was measured on a SuperNova diffractometer with Atlas S2 detector using a CuK $\alpha$  microfocus source. The measured data was processed with the CrysAlisPro (v40.18b) software package.<sup>[S7]</sup> Using Olex2,<sup>[S8]</sup> the structure was solved with the ShelXT<sup>[S9]</sup> structure solution program using Intrinsic Phasing and refined with the ShelXL<sup>[S10]</sup> refinement package using Least Squares minimization. Except of the hydride at aluminum, all hydrogen atoms were placed in ideal positions and refined as riding atoms with relative isotropic displacement parameters. The position of the hydride was observed from difference Fourier maps and refined.

Disorder of one isopropyl group of the ligand over two positions was observed, which was modeled with the help of similarity restraints (SADI) and rigid bond restraints (RIGU<sup>[S11]</sup>). The relative contributions of the two alternative orientations were refined to 0.874(7) and 0.126(7).

Table S1 contains a summary of crystal data and refinement details. The crystal structure data has been deposited with the Cambridge Crystallographic Data Centre. CCDC 1941420 contains the supplementary crystallographic data for complex (DIPPBDI)Al(Ph)H. This data can be obtained free of charge from The Cambridge Crystallographic Data Centre via [www.ccdc.cam.ac.uk/data\\_request/cif](http://www.ccdc.cam.ac.uk/data_request/cif).

### Structure Determination of (DIPPBDI)Al(*m*-tolyl)H

A colorless crystal of (DIPPBDI)Al(*m*-tolyl)H was embedded in inert perfluoropolyalkylether (viscosity 1800 cSt; ABCR GmbH) and mounted using a Hampton Research CryoLoop. The crystal was then flash cooled to 100.0(1) K in a nitrogen gas stream and kept at this temperature during the experiment. The crystal structure was measured on a SuperNova diffractometer with Atlas S2 detector using a CuK $\alpha$  microfocus source. The measured data was processed with the CrysAlisPro (v40.18b) software package.<sup>[S7]</sup> Using Olex2,<sup>[S8]</sup> the structure was solved with the ShelXT<sup>[S9]</sup> structure solution program using Intrinsic Phasing and refined with the ShelXL<sup>[S10]</sup> refinement package using Least Squares minimization. Except of the hydride at aluminum, all hydrogen atoms were placed in ideal positions and refined as riding atoms with relative isotropic displacement parameters. The position of the hydride was observed from difference Fourier maps and refined.

In the final stages of the structure refinement it became obvious that the crystal under investigation contained a small amount of  $(\text{DIP}^{\text{P}}\text{BDI})\text{Al}(\text{o-tolyl})\text{H}$  as impurity. The resulting disorder of the tolyl group was modeled with the help of similarity restraints (SADI, SIMU) and rigid bond restraints (RIGU).<sup>[S11]</sup> The relative contributions of the two alternative orientations were refined to 0.912(4) (*m*-tolyl) and 0.088(4) (*o*-tolyl) .

Table S1 contains a summary of crystal data and refinement details. The crystal structure data has been deposited with the Cambridge Crystallographic Data Centre. CCDC 1941421 contains the supplementary crystallographic data for complex  $(\text{DIP}^{\text{P}}\text{BDI})\text{Al}(\textit{m-tolyl})\text{H}$ . This data can be obtained free of charge from The Cambridge Crystallographic Data Centre via [www.ccdc.cam.ac.uk/data\\_request/cif](http://www.ccdc.cam.ac.uk/data_request/cif).

### Structure Determination of $(\text{DIP}^{\text{P}}\text{BDI})\text{Al}(\text{2,5-dimethylphenyl})\text{H}$

A colorless crystal of  $(\text{DIP}^{\text{P}}\text{BDI})\text{Al}(\text{2,5-dimethylphenyl})\text{H}$  was embedded in inert perfluoropolyalkylether (viscosity 1800 cSt; ABCR GmbH) and mounted using a Hampton Research CryoLoop. The crystal was then flash cooled to 100.0(1) K in a nitrogen gas stream and kept at this temperature during the experiment. The crystal structure was measured on a SuperNova diffractometer with Atlas S2 detector using a  $\text{CuK}\alpha$  microfocus source. The measured data was processed with the CrysAlisPro (v40.18b) software package.<sup>[S7]</sup> Using Olex2,<sup>[S8]</sup> the structure was solved with the ShelXT<sup>[S9]</sup> structure solution program using Intrinsic Phasing and refined with the ShelXL<sup>[S10]</sup> refinement package using Least Squares minimization. Most hydrogen atoms were placed in ideal positions and refined as riding atoms with relative isotropic displacement parameters. The positions of the hydride at aluminum and of the hydrogen atom at C11 were observed from difference Fourier maps and refined.

Disorder of co-crystallized *n*-hexane over two positions was observed, which was modeled with the help of similarity restraints (SADI, SIMU) and rigid bond restraints (RIGU<sup>[S11]</sup>). The relative contributions of the two alternative orientations were refined to 0.902(5) and 0.098(5).

Table S1 contains a summary of crystal data and refinement details. The crystal structure data has been deposited with the Cambridge Crystallographic Data Centre. CCDC 1941422 contains the supplementary crystallographic data for complex  $(\text{DIP}^{\text{P}}\text{BDI})\text{Al}(\text{2,5-dimethylphenyl})\text{H}$ . This data can be obtained free of charge from The Cambridge Crystallographic Data Centre via [www.ccdc.cam.ac.uk/data\\_request/cif](http://www.ccdc.cam.ac.uk/data_request/cif).

### Structure Determination of $(\text{DIPPBdi})\text{Al}(\text{H})\text{Zn}(\text{DIPPBdi})$

A yellow crystal of  $(\text{DIPPBdi})\text{Al}(\text{H})\text{Zn}(\text{DIPPBdi})$  was embedded in inert perfluoropolyalkylether (viscosity 1800 cSt; ABCR GmbH) and mounted using a Hampton Research CryoLoop. The crystal was then flash cooled to 100.0(1) K in a nitrogen gas stream and kept at this temperature during the experiment. The crystal structure was measured on a SuperNova diffractometer with Atlas S2 detector using a  $\text{CuK}\alpha$  microfocus source. The measured data was processed with the CrysAlisPro (v40.18b) software package.<sup>[S7]</sup> Using Olex2,<sup>[S8]</sup> the structure was solved with the ShelXT<sup>[S9]</sup> structure solution program using Intrinsic Phasing and refined with the ShelXL<sup>[S10]</sup> refinement package using Least Squares minimization. Except of the hydride at aluminum, all hydrogen atoms were placed in ideal positions and refined as riding atoms with relative isotropic displacement parameters. The position of the hydride was observed from difference Fourier maps and refined.

In the crystal, disorder of the central Zn-Al(H) fragment over two positions was observed. This induces additional disorder in 4 isopropyl groups and one methyl group, which was modeled with the help of similarity restraints (SADI, SIMU) and rigid bond restraints (RIGU<sup>[S11]</sup>). The relative contributions of the two alternative orientations of the molecule were refined to 0.8107(14) and 0.1893(14).

Table S2 contains a summary of crystal data and refinement details. The crystal structure data has been deposited with the Cambridge Crystallographic Data Centre. CCDC 1941423 contains the supplementary crystallographic data for complex  $(\text{DIPPBdi})\text{Al}(\text{H})\text{Zn}(\text{DIPPBdi})$ . This data can be obtained free of charge from The Cambridge Crystallographic Data Centre via [www.ccdc.cam.ac.uk/data\\_request/cif](http://www.ccdc.cam.ac.uk/data_request/cif).

### Structure Determination of $(\text{DIPPBdi})\text{Al}(\text{H})\text{Mg}(\text{DIPPBdi})$

A red crystal of  $(\text{DIPPBdi})\text{Al}(\text{H})\text{Mg}(\text{DIPPBdi})$  was embedded in inert perfluoropolyalkylether (viscosity 1800 cSt; ABCR GmbH) and mounted using a Hampton Research CryoLoop. The crystal was then flash cooled to 100.0(1) K in a nitrogen gas stream and kept at this temperature during the experiment. The crystal structure was measured on a SuperNova diffractometer with Atlas S2 detector using a  $\text{CuK}\alpha$  microfocus source. The measured data was processed with the CrysAlisPro (v40.18b) software package.<sup>[S7]</sup> Using Olex2,<sup>[S8]</sup> the structure was solved with the ShelXT<sup>[S9]</sup> structure solution program using Intrinsic Phasing and refined with the ShelXL<sup>[S10]</sup> refinement package using Least Squares minimization. Except of the hydride at aluminum, all hydrogen atoms were placed in ideal positions and refined as riding atoms with relative isotropic displacement parameters. The position of the hydride was observed from difference Fourier maps and refined.

Disorder of one isopropyl group of the ligand over two positions was observed and successfully modeled. The relative contributions of the two alternative orientations were refined to 0.703(15) and 0.297(15).

Table S2 contains a summary of crystal data and refinement details. The crystal structure data has been deposited with the Cambridge Crystallographic Data Centre. CCDC 1941424 contains the supplementary crystallographic data for complex  $(^{\text{DIP}}\text{PBDI})\text{Al}(\text{H})\text{Mg}(^{\text{DIP}}\text{PBDI})$ . This data can be obtained free of charge from The Cambridge Crystallographic Data Centre via [www.ccdc.cam.ac.uk/data\\_request/cif](http://www.ccdc.cam.ac.uk/data_request/cif)

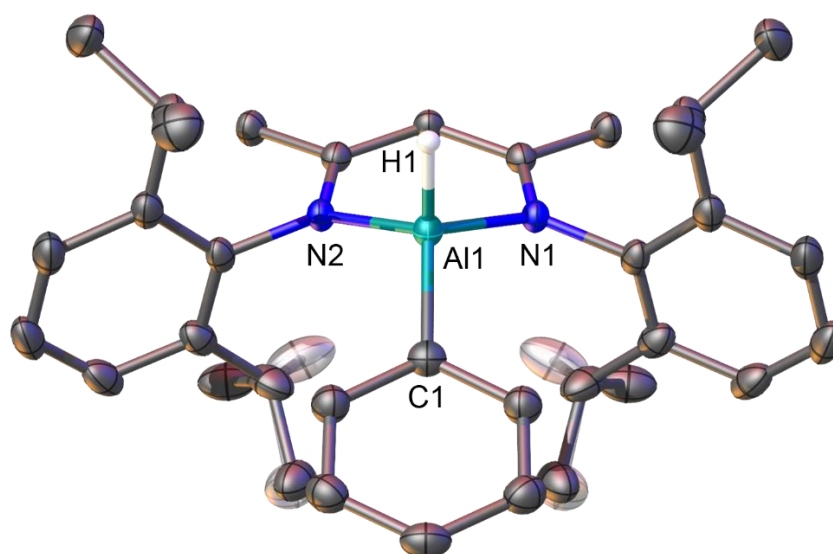

**Figure S21:** The crystal structure of  $(^{\text{DIP}}\text{PBDI})\text{Al}(\text{Ph})\text{H}$  (50% probability ellipsoids). The disorder is shown with 30% transparency.



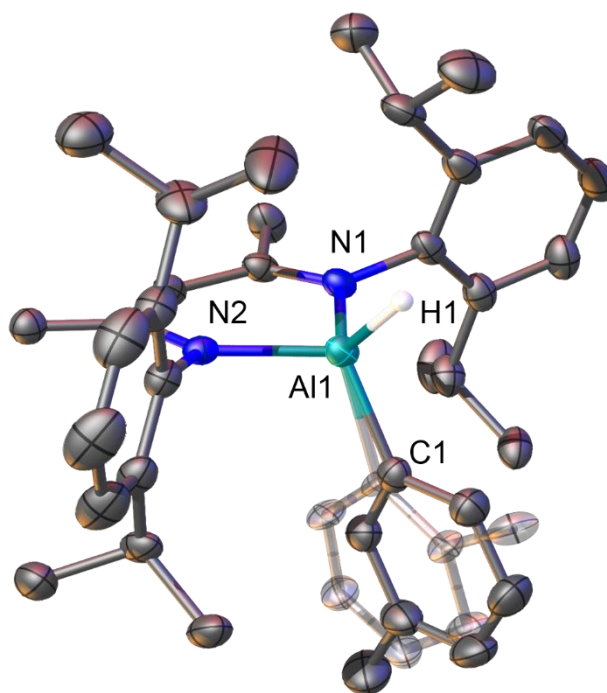

**Figure S22:** The crystal structure of (DIPPBDI)Al(*m*-tolyl)H (50% probability ellipsoids). The disorder is shown with 30% transparency.

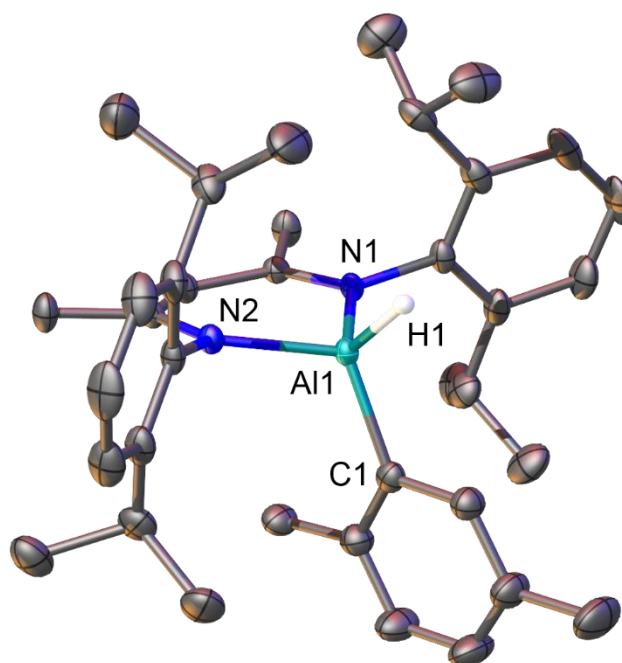

**Figure S23:** The crystal structure of (DIPPBDI)Al(2,5-dimethylphenyl)H (50% probability ellipsoids).

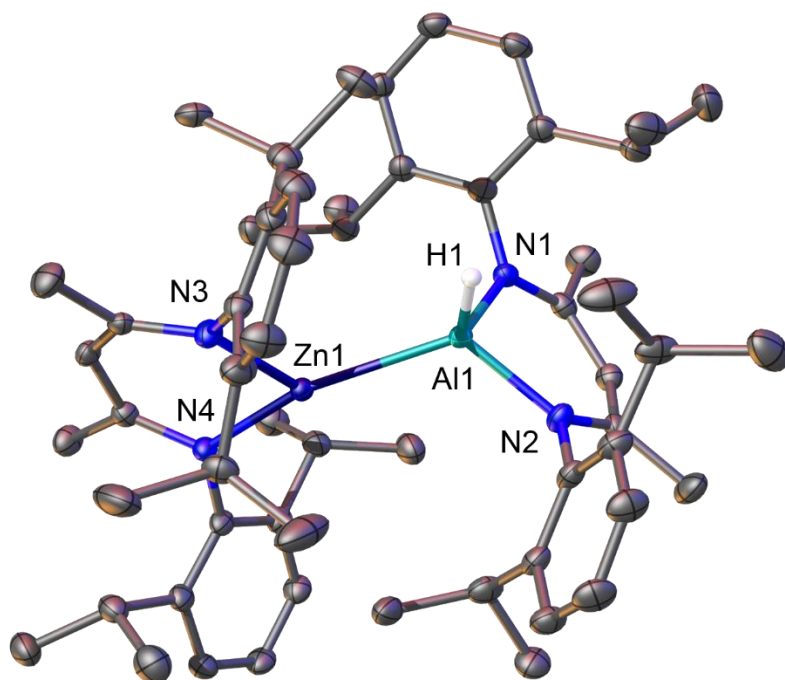

**Figure S24:** The crystal structure of  $(\text{DIPPBDI})\text{Al}(\text{H})\text{Zn}(\text{DIPPBDI})$  (50% probability ellipsoids). The disorder is omitted for clarity.

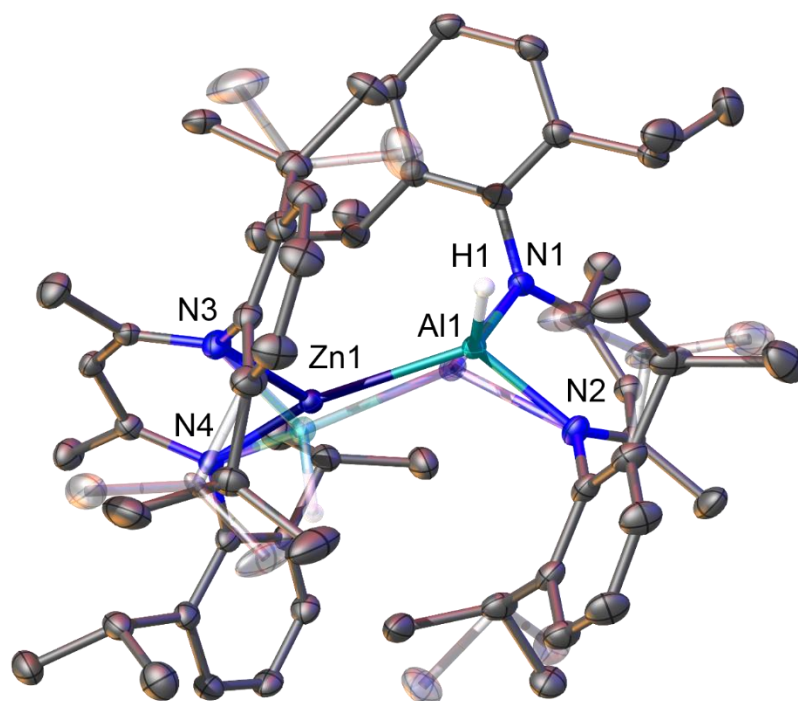

**Figure S25:** The crystal structure of  $(\text{DIPPBDI})\text{Al}(\text{H})\text{Zn}(\text{DIPPBDI})$  (50% probability ellipsoids). The disorder is shown with 30% transparency.

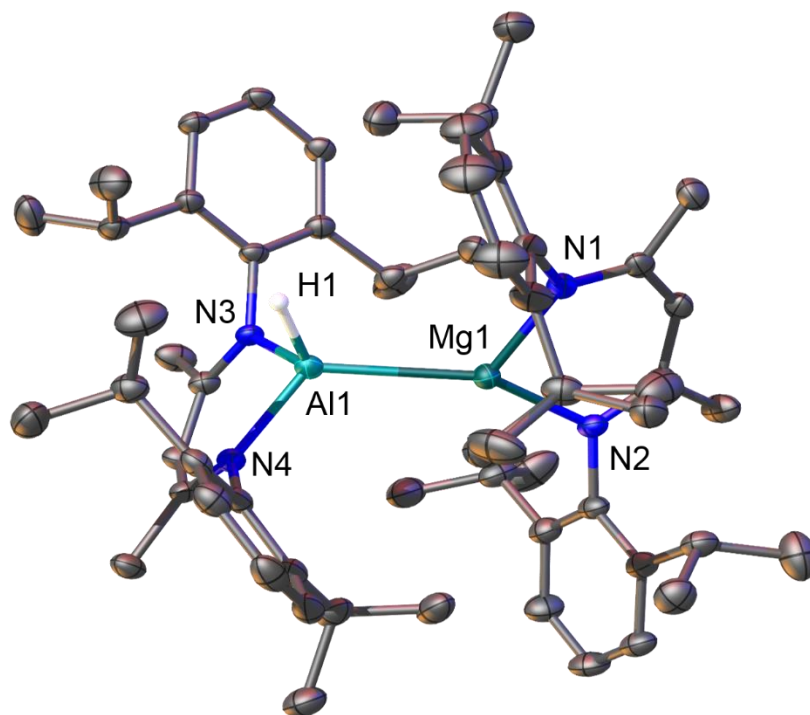

**Figure S26:** The crystal structure of  $(^{\text{DIPP}}\text{BDI})\text{Al}(\text{H})\text{Mg}(^{\text{DIPP}}\text{BDI})$  (50% probability ellipsoids).

**Table S1:** Crystal data and structure refinement for compound (<sup>DIPP</sup>BDI)Al(Ph)H, (<sup>DIPP</sup>BDI)Al(m-tolyl)H and (<sup>DIPP</sup>BDI)Al(2,5-dimethylphenyl)H.

| Identification code                                   | ( <sup>DIPP</sup> BDI)Al(Ph)H                                 | ( <sup>DIPP</sup> BDI)Al(m-tolyl)H                            | ( <sup>DIPP</sup> BDI)Al(2,5-dimethylphenyl)H<br>· <i>n</i> -Hexane |
|-------------------------------------------------------|---------------------------------------------------------------|---------------------------------------------------------------|---------------------------------------------------------------------|
| Empirical formula                                     | C <sub>35</sub> H <sub>47</sub> AlN <sub>2</sub>              | C <sub>36</sub> H <sub>49</sub> AlN <sub>2</sub>              | C <sub>43</sub> H <sub>65</sub> AlN <sub>2</sub>                    |
| Formula weight                                        | 522.72                                                        | 536.75                                                        | 636.95                                                              |
| Temperature/K                                         | 100.0(1)                                                      | 100.0(1)                                                      | 100.0(1)                                                            |
| Crystal system                                        | orthorhombic                                                  | orthorhombic                                                  | orthorhombic                                                        |
| Space group                                           | Pnma                                                          | Pna2 <sub>1</sub>                                             | Pnma                                                                |
| <i>a</i> /Å                                           | 16.5626(3)                                                    | 16.6292(2)                                                    | 14.5876(2)                                                          |
| <i>b</i> /Å                                           | 20.9046(3)                                                    | 12.7285(2)                                                    | 23.2280(4)                                                          |
| <i>c</i> /Å                                           | 9.01452(17)                                                   | 15.5352(2)                                                    | 11.8538(2)                                                          |
| $\alpha$ /°                                           | 90                                                            | 90                                                            | 90                                                                  |
| $\beta$ /°                                            | 90                                                            | 90                                                            | 90                                                                  |
| $\gamma$ /°                                           | 90                                                            | 90                                                            | 90                                                                  |
| Volume/Å <sup>3</sup>                                 | 3121.13(9)                                                    | 3288.25(8)                                                    | 4016.56(13)                                                         |
| Z                                                     | 4                                                             | 4                                                             | 4                                                                   |
| $\rho_{\text{calc}}$ /cm <sup>3</sup>                 | 1.112                                                         | 1.084                                                         | 1.053                                                               |
| $\mu$ /mm <sup>-1</sup>                               | 0.736                                                         | 0.710                                                         | 0.645                                                               |
| F(000)                                                | 1136.0                                                        | 1168.0                                                        | 1400.0                                                              |
| Crystal size/mm <sup>3</sup>                          | 0.516 × 0.218 × 0.118                                         | 0.196 × 0.176 × 0.087                                         | 0.274 × 0.063 × 0.054                                               |
| Radiation                                             | CuK $\alpha$ ( $\lambda$ = 1.54184)                           | CuK $\alpha$ ( $\lambda$ = 1.54184)                           | CuK $\alpha$ ( $\lambda$ = 1.54184)                                 |
| 2 $\theta$ range for data collection/°                | 8.46 to 147.13                                                | 8.748 to 145.844                                              | 8.374 to 147.372                                                    |
| Index ranges                                          | -12 ≤ <i>h</i> ≤ 20, -24 ≤ <i>k</i> ≤ 25, -4 ≤ <i>l</i> ≤ 10  | -20 ≤ <i>h</i> ≤ 20, -12 ≤ <i>k</i> ≤ 15, -19 ≤ <i>l</i> ≤ 19 | -15 ≤ <i>h</i> ≤ 17, -17 ≤ <i>k</i> ≤ 27, -9 ≤ <i>l</i> ≤ 14        |
| Reflections collected                                 | 7078                                                          | 26881                                                         | 9196                                                                |
| Independent reflections                               | 3136 [R <sub>int</sub> = 0.0242, R <sub>sigma</sub> = 0.0288] | 6454 [R <sub>int</sub> = 0.0364, R <sub>sigma</sub> = 0.0256] | 3998 [R <sub>int</sub> = 0.0278, R <sub>sigma</sub> = 0.0294]       |
| Data/restraints/parameters                            | 3136/15/207                                                   | 6454/585/432                                                  | 3998/106/267                                                        |
| Goodness-of-fit on F <sup>2</sup>                     | 1.022                                                         | 1.047                                                         | 1.072                                                               |
| Final R indexes [ <i>I</i> > 2 $\sigma$ ( <i>I</i> )] | R <sub>1</sub> = 0.0406, wR <sub>2</sub> = 0.1082             | R <sub>1</sub> = 0.0345, wR <sub>2</sub> = 0.0888             | R <sub>1</sub> = 0.0437, wR <sub>2</sub> = 0.1185                   |
| Final R indexes [all data]                            | R <sub>1</sub> = 0.0447, wR <sub>2</sub> = 0.1126             | R <sub>1</sub> = 0.0361, wR <sub>2</sub> = 0.0902             | R <sub>1</sub> = 0.0531, wR <sub>2</sub> = 0.1248                   |
| Largest diff. peak/hole / e Å <sup>-3</sup>           | 0.35/-0.26                                                    | 0.14/-0.23                                                    | 0.41/-0.36                                                          |
| Flack parameter                                       | -                                                             | -0.08(2)                                                      | -                                                                   |
| CCDC number                                           | 1941420                                                       | 1941421                                                       | 1941422                                                             |

**Table S2:** Crystal data and structure refinement for compound (<sup>DIPP</sup>BDI)Al(H)Zn(<sup>DIPP</sup>BDI) and (<sup>DIPP</sup>BDI)Al(H)Mg(<sup>DIPP</sup>BDI).

| Identification code                         | ( <sup>DIPP</sup> BDI)Al(H)Zn( <sup>DIPP</sup> BDI)            | ( <sup>DIPP</sup> BDI)Al(H)Mg( <sup>DIPP</sup> BDI)            |
|---------------------------------------------|----------------------------------------------------------------|----------------------------------------------------------------|
| Empirical formula                           | C <sub>58</sub> H <sub>83</sub> AlN <sub>4</sub> Zn            | C <sub>58</sub> H <sub>83</sub> AlMgN <sub>4</sub>             |
| Formula weight                              | 928.63                                                         | 887.57                                                         |
| Temperature/K                               | 100.0(1)                                                       | 100.0(1)                                                       |
| Crystal system                              | triclinic                                                      | monoclinic                                                     |
| Space group                                 | P-1                                                            | P2 <sub>1</sub> /n                                             |
| a/Å                                         | 11.93991(19)                                                   | 15.91598(13)                                                   |
| b/Å                                         | 12.63426(19)                                                   | 17.44284(17)                                                   |
| c/Å                                         | 21.0771(3)                                                     | 19.46920(16)                                                   |
| α/°                                         | 90.3215(11)                                                    | 90                                                             |
| β/°                                         | 106.1832(13)                                                   | 94.4631(7)                                                     |
| γ/°                                         | 111.8064(14)                                                   | 90                                                             |
| Volume/Å <sup>3</sup>                       | 2813.71(8)                                                     | 5388.65(8)                                                     |
| Z                                           | 2                                                              | 4                                                              |
| ρ <sub>calc</sub> /cm <sup>3</sup>          | 1.096                                                          | 1.094                                                          |
| μ/mm <sup>-1</sup>                          | 1.029                                                          | 0.727                                                          |
| F(000)                                      | 1004.0                                                         | 1936.0                                                         |
| Crystal size/mm <sup>3</sup>                | 0.47 × 0.248 × 0.183                                           | 0.297 × 0.182 × 0.141                                          |
| Radiation                                   | CuKα (λ = 1.54184)                                             | CuKα (λ = 1.54184)                                             |
| 2θ range for data collection/°              | 7.594 to 147.37                                                | 6.814 to 145.192                                               |
| Index ranges                                | -14 ≤ h ≤ 14, -15 ≤ k ≤ 15, -26 ≤ l ≤ 25                       | -19 ≤ h ≤ 19, -19 ≤ k ≤ 21, -21 ≤ l ≤ 23                       |
| Reflections collected                       | 42848                                                          | 30507                                                          |
| Independent reflections                     | 11140 [R <sub>int</sub> = 0.0226, R <sub>sigma</sub> = 0.0189] | 10365 [R <sub>int</sub> = 0.0244, R <sub>sigma</sub> = 0.0251] |
| Data/restraints/parameters                  | 11140/198/722                                                  | 10365/0/622                                                    |
| Goodness-of-fit on F <sup>2</sup>           | 1.107                                                          | 1.033                                                          |
| Final R indexes [I > 2σ (I)]                | R <sub>1</sub> = 0.0413, wR <sub>2</sub> = 0.0959              | R <sub>1</sub> = 0.0414, wR <sub>2</sub> = 0.1070              |
| Final R indexes [all data]                  | R <sub>1</sub> = 0.0432, wR <sub>2</sub> = 0.0965              | R <sub>1</sub> = 0.0476, wR <sub>2</sub> = 0.1114              |
| Largest diff. peak/hole / e Å <sup>-3</sup> | 0.36/-0.37                                                     | 0.56/-0.44                                                     |
| CCDC number                                 | 1941423                                                        | 1941424                                                        |

## 2. Computational Details

### General

All calculations were carried out using Gaussian 16A.<sup>[S12]</sup> All methods were used as implemented. All structures were fully optimized on a  $\omega$ B97XD/6-31+G\*\* level of theory.<sup>[S13-S15]</sup> All structures were characterized as true minima (Nimag=0) or transition states (Nimag=1) by frequency calculations on the same level of theory except the minima for  $(\text{DIPPBdi})\text{Zn-Al(H)}(\text{DIPPBdi})$ ,  $(\text{DIPPBdi})\text{Mg-Al(H)}(\text{DIPPBdi})$ ,  $(\text{DIPPBdi})\text{Ca-Al(H)}(\text{DIPPBdi})$  and  $(\text{DIPPBdi})\text{Ca-Al}(\mu\text{-H})(\text{DIPPBdi})$ , for which frequency calculations were carried out at  $\omega$ B97XD/6-31G\* level of theory due to convergence issues at higher levels of theory. Energies were determined at a  $\omega$ B97XD/6-311+G\*\* level of theory. Solvation effects were approximated using a PCM field of benzene.<sup>[S16]</sup> Charges were calculated via NBO Analyses.<sup>[S17]</sup> We calculated three different pathways for the reaction between  $(\text{DIPPBdi})\text{Al}$  and benzene catalyzed by  $\text{CaH}_2$ . The latter Ca hydride species was used as a model system in order to save on calculational costs. Charges were calculated using NBO analyses. All structures were evaluated using Molecule 2.3.<sup>[S18]</sup> Topological analyses were carried out with AIMAll17 using the wave function of the optimization.<sup>[S19,S20]</sup>

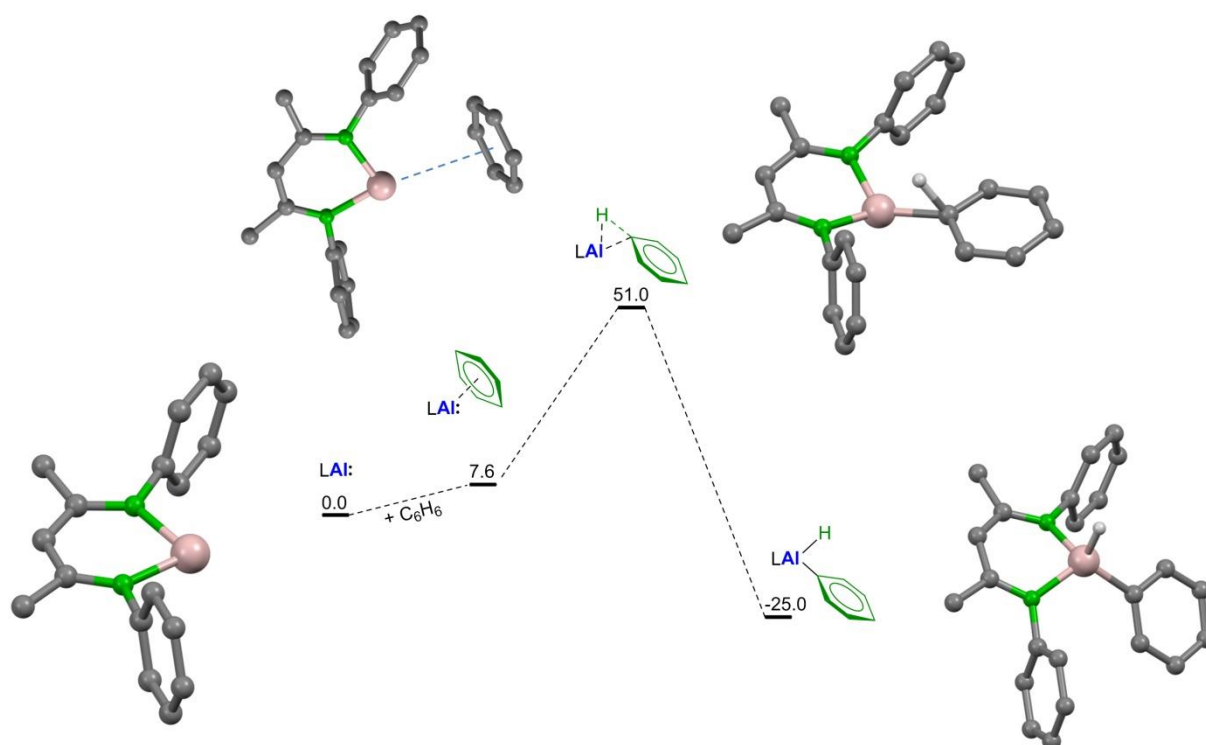

**Figure S27:** Direct oxidative addition of  $(\text{DIPPBdi})\text{Al}$  to the C-H bond in benzene.  $\omega$ B97XD/6-311+G\*\*// $\omega$ B97XD/6-31+G\*\*,  $\Delta G$  values at 298 K and 1 bar given in kcal/mol.

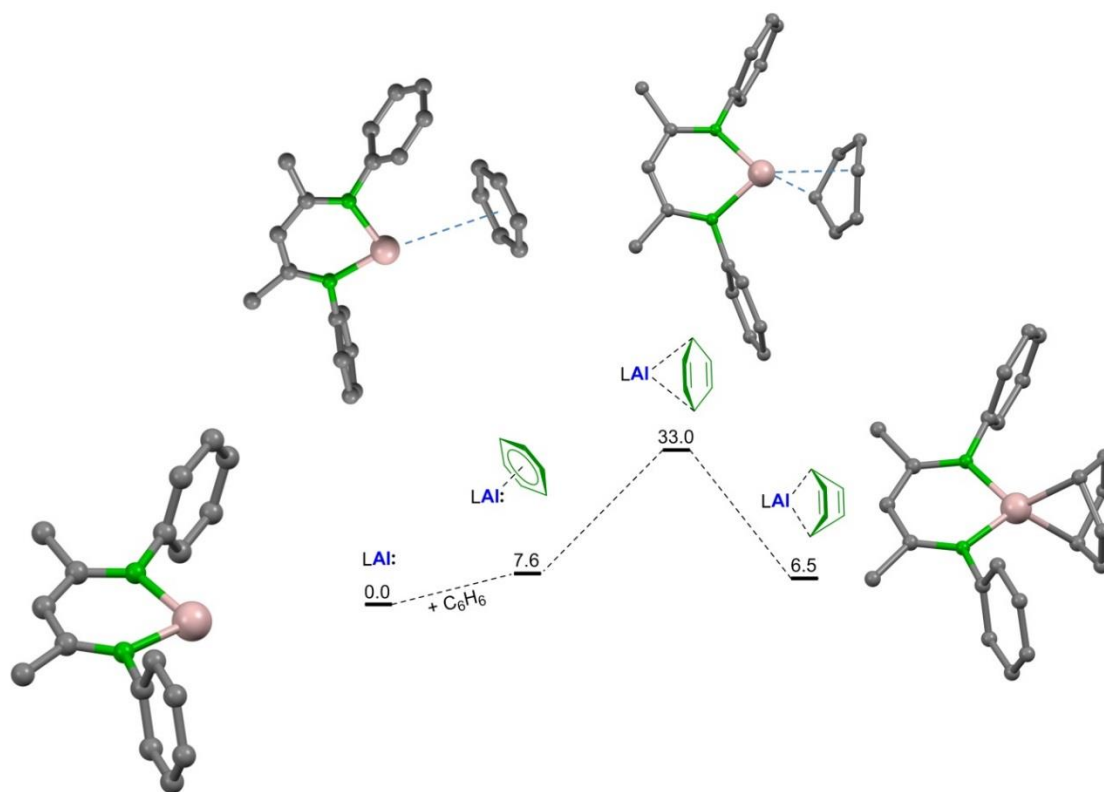

**Figure S28:** Reduction of benzene by (DIPP)BDI)Al.  $\omega$ B97XD/6-311+G\*\*// $\omega$ B97XD/6-31+G\*\*,  $\Delta G$  values at 298 K and 1 bar given in kcal/mol.

## XYZ Coordinates

147

LMg-  
Al(H)L

|    |           |           |           |
|----|-----------|-----------|-----------|
| Al | 1.335556  | 0.414239  | -0.220647 |
| H  | 2.315674  | 0.213481  | 1.045032  |
| N  | 2.403876  | -0.270397 | -1.720891 |
| N  | 1.564951  | 2.287567  | -0.784651 |
| C  | 3.308669  | -0.307539 | -4.002350 |
| H  | 4.277745  | -0.730466 | -3.724813 |
| H  | 3.447178  | 0.368646  | -4.846447 |
| H  | 2.681080  | -1.146026 | -4.318486 |
| C  | 2.668099  | 0.406548  | -2.835928 |
| C  | 2.413351  | 1.776903  | -2.981507 |
| H  | 2.677612  | 2.218154  | -3.934174 |
| C  | 2.000842  | 2.673698  | -1.976285 |
| C  | 2.068668  | 4.143027  | -2.318402 |
| H  | 1.085080  | 4.493195  | -2.644187 |
| H  | 2.776067  | 4.315371  | -3.130395 |
| H  | 2.356645  | 4.744817  | -1.454212 |
| C  | 3.033922  | -1.545507 | -1.537073 |
| C  | 4.334759  | -1.566694 | -0.992722 |
| C  | 4.974930  | -2.797348 | -0.847577 |
| H  | 5.981417  | -2.829979 | -0.439533 |
| C  | 4.349779  | -3.982225 | -1.216620 |
| H  | 4.866281  | -4.930540 | -1.103710 |
| C  | 3.051469  | -3.947886 | -1.704671 |
| H  | 2.552795  | -4.879655 | -1.957745 |
| C  | 2.366735  | -2.740254 | -1.858243 |
| C  | 5.049075  | -0.292575 | -0.564811 |
| H  | 4.355174  | 0.540323  | -0.698488 |
| C  | 6.283506  | -0.010855 | -1.432204 |
| H  | 7.027901  | -0.809489 | -1.337518 |
| H  | 6.756476  | 0.927367  | -1.123435 |
| H  | 6.019855  | 0.079392  | -2.490416 |
| C  | 5.418599  | -0.335264 | 0.922790  |
| H  | 4.524695  | -0.485597 | 1.534649  |
| H  | 5.881649  | 0.612503  | 1.219017  |
| H  | 6.134115  | -1.136529 | 1.139534  |
| C  | 0.919108  | -2.758371 | -2.318504 |
| H  | 0.589390  | -1.718393 | -2.396389 |
| C  | 0.741677  | -3.417812 | -3.690624 |
| H  | 1.300556  | -2.890507 | -4.469841 |
| H  | -0.315379 | -3.421463 | -3.972875 |
| H  | 1.083566  | -4.458179 | -3.682220 |
| C  | 0.032349  | -3.453378 | -1.274783 |
| H  | 0.283785  | -4.515626 | -1.180266 |
| H  | -1.027194 | -3.386912 | -1.546317 |



|    |           |           |           |
|----|-----------|-----------|-----------|
| H  | 0.163344  | -3.006317 | -0.283757 |
| C  | 1.161128  | 3.272188  | 0.178616  |
| C  | 2.037977  | 3.597272  | 1.232109  |
| C  | 1.630017  | 4.555292  | 2.163045  |
| H  | 2.299931  | 4.828092  | 2.973121  |
| C  | 0.389875  | 5.172276  | 2.068458  |
| H  | 0.092309  | 5.916769  | 2.800528  |
| C  | -0.473056 | 4.820955  | 1.039329  |
| H  | -1.452339 | 5.288064  | 0.982466  |
| C  | -0.114625 | 3.866042  | 0.086341  |
| C  | 3.421330  | 2.976209  | 1.353941  |
| H  | 3.475266  | 2.141886  | 0.652204  |
| C  | 4.512286  | 3.983002  | 0.964586  |
| H  | 4.366596  | 4.351972  | -0.056026 |
| H  | 5.499825  | 3.511358  | 1.015518  |
| H  | 4.515169  | 4.847578  | 1.638271  |
| C  | 3.662320  | 2.395551  | 2.751661  |
| H  | 3.653088  | 3.171589  | 3.525276  |
| H  | 4.639253  | 1.903805  | 2.790527  |
| H  | 2.898981  | 1.649911  | 2.992789  |
| C  | -1.126526 | 3.477211  | -0.981161 |
| H  | -0.651482 | 2.767039  | -1.663754 |
| C  | -1.618870 | 4.674762  | -1.806836 |
| H  | -2.211340 | 5.362178  | -1.193349 |
| H  | -2.259667 | 4.325619  | -2.623044 |
| H  | -0.794231 | 5.249507  | -2.237343 |
| C  | -2.329888 | 2.771099  | -0.348914 |
| H  | -2.005595 | 1.922466  | 0.262801  |
| H  | -3.014465 | 2.405517  | -1.118156 |
| H  | -2.885277 | 3.450099  | 0.307913  |
| Mg | -1.103372 | -0.646119 | 0.119936  |
| N  | -1.343850 | -1.779875 | 1.847601  |
| N  | -2.966724 | -1.188602 | -0.559359 |
| C  | -2.291903 | -3.619794 | 3.194406  |
| H  | -1.832348 | -4.597452 | 3.014085  |
| H  | -3.338762 | -3.790160 | 3.456538  |
| H  | -1.780464 | -3.153932 | 4.038085  |
| C  | -2.198217 | -2.774423 | 1.943099  |
| C  | -3.084512 | -3.132638 | 0.889022  |
| H  | -3.619917 | -4.063967 | 1.038904  |
| C  | -3.481928 | -2.379275 | -0.221252 |
| C  | -4.595327 | -2.956455 | -1.069917 |
| H  | -5.534509 | -2.423071 | -0.902312 |
| H  | -4.756046 | -4.010961 | -0.841076 |
| H  | -4.356480 | -2.851844 | -2.132553 |
| C  | -0.459357 | -1.388588 | 2.897868  |
| C  | 0.690362  | -2.138997 | 3.210600  |
| C  | 1.587138  | -1.625960 | 4.150805  |
| H  | 2.481172  | -2.193083 | 4.394435  |

|   |           |           |           |
|---|-----------|-----------|-----------|
| C | 1.377049  | -0.397740 | 4.757952  |
| H | 2.095262  | -0.010390 | 5.474011  |
| C | 0.247136  | 0.341433  | 4.430884  |
| H | 0.091805  | 1.307331  | 4.899916  |
| C | -0.680733 | -0.133329 | 3.505226  |
| C | 1.026281  | -3.456389 | 2.531138  |
| H | 0.215479  | -3.704081 | 1.840230  |
| C | 1.148409  | -4.610409 | 3.536764  |
| H | 2.003612  | -4.462438 | 4.204945  |
| H | 1.301475  | -5.558367 | 3.009838  |
| H | 0.254154  | -4.702790 | 4.159823  |
| C | 2.311423  | -3.326626 | 1.704386  |
| H | 2.257161  | -2.484724 | 1.009685  |
| H | 2.492935  | -4.236622 | 1.124888  |
| H | 3.180578  | -3.158841 | 2.349630  |
| C | -1.941463 | 0.664174  | 3.213073  |
| C | -3.708893 | -0.324492 | -1.417841 |
| C | -3.247537 | -0.037665 | -2.719186 |
| C | -3.920394 | 0.921463  | -3.481268 |
| H | -3.562335 | 1.153366  | -4.480700 |
| C | -5.044211 | 1.573713  | -2.996277 |
| H | -5.556436 | 2.312777  | -3.604433 |
| C | -5.506935 | 1.268145  | -1.722559 |
| H | -6.383065 | 1.784270  | -1.339669 |
| C | -4.854634 | 0.337526  | -0.914073 |
| C | -2.064883 | -0.761090 | -3.344797 |
| H | -1.695442 | -1.486578 | -2.613301 |
| C | -0.915103 | 0.196300  | -3.684258 |
| H | -1.231323 | 0.966206  | -4.396423 |
| H | -0.078319 | -0.349172 | -4.134701 |
| H | -0.538528 | 0.697891  | -2.787214 |
| C | -2.506649 | -1.548748 | -4.587362 |
| H | -3.286086 | -2.276310 | -4.339849 |
| H | -1.659945 | -2.086014 | -5.025306 |
| H | -2.907009 | -0.882088 | -5.358374 |
| C | -5.373596 | 0.119920  | 0.502618  |
| H | -4.800488 | -0.687343 | 0.965341  |
| C | -6.855192 | -0.284094 | 0.527704  |
| H | -7.500160 | 0.534482  | 0.190191  |
| H | -7.157693 | -0.542680 | 1.547612  |
| H | -7.055680 | -1.146901 | -0.114069 |
| C | -5.158350 | 1.376586  | 1.357100  |
| H | -4.097089 | 1.623442  | 1.433763  |
| H | -5.549731 | 1.222925  | 2.367944  |
| H | -5.672556 | 2.241780  | 0.924281  |
| C | -1.728605 | 2.179227  | 3.250590  |
| H | -1.555796 | 2.542918  | 4.269019  |
| H | -0.877048 | 2.480014  | 2.632669  |
| H | -2.283386 | 0.407180  | 2.202478  |

|   |           |           |          |
|---|-----------|-----------|----------|
| C | -3.062322 | 0.228606  | 4.168606 |
| H | -3.285940 | -0.836689 | 4.051390 |
| H | -3.978849 | 0.794992  | 3.978282 |
| H | -2.761994 | 0.399883  | 5.208259 |
| H | -2.618631 | 2.693233  | 2.872994 |

147

LCa-  
Al(H)L

|    |           |           |           |
|----|-----------|-----------|-----------|
| Al | -2.007943 | 0.011351  | 0.468112  |
| H  | -2.994245 | 0.635014  | 1.595586  |
| N  | -3.029354 | 0.416429  | -1.200178 |
| N  | -2.555943 | -1.899190 | 0.396774  |
| C  | -4.233475 | -0.027722 | -3.313012 |
| H  | -4.249369 | 1.054889  | -3.436531 |
| H  | -5.261471 | -0.400012 | -3.333565 |
| H  | -3.711657 | -0.473013 | -4.166675 |
| C  | -3.556333 | -0.464760 | -2.032164 |
| C  | -3.535251 | -1.855053 | -1.800914 |
| H  | -3.960428 | -2.471838 | -2.584026 |
| C  | -3.120553 | -2.516566 | -0.635943 |
| C  | -3.377614 | -4.003722 | -0.564578 |
| H  | -2.511203 | -4.539316 | -0.170313 |
| H  | -3.629259 | -4.401487 | -1.548655 |
| H  | -4.210729 | -4.210613 | 0.113221  |
| C  | -3.182054 | 1.822270  | -1.414929 |
| C  | -4.286662 | 2.479844  | -0.839213 |
| C  | -4.411514 | 3.856801  | -1.031407 |
| H  | -5.264532 | 4.378534  | -0.607070 |
| C  | -3.468525 | 4.572370  | -1.759044 |
| H  | -3.586474 | 5.642211  | -1.901972 |
| C  | -2.369307 | 3.913624  | -2.294339 |
| H  | -1.628721 | 4.479173  | -2.853572 |
| C  | -2.198294 | 2.538660  | -2.122966 |
| C  | -5.350835 | 1.719668  | -0.062153 |
| H  | -4.972877 | 0.709603  | 0.113915  |
| C  | -6.646815 | 1.608796  | -0.878087 |
| H  | -7.082149 | 2.597890  | -1.061738 |
| H  | -7.387638 | 1.008661  | -0.339024 |
| H  | -6.467962 | 1.137626  | -1.849351 |
| C  | -5.614412 | 2.340316  | 1.313789  |
| H  | -4.688721 | 2.388996  | 1.893259  |
| H  | -6.330721 | 1.725691  | 1.869021  |
| H  | -6.036334 | 3.348653  | 1.235143  |
| C  | -0.982173 | 1.850615  | -2.722482 |
| H  | -0.965415 | 0.831377  | -2.324233 |
| C  | -1.074386 | 1.757103  | -4.250231 |
| H  | -1.958357 | 1.194388  | -4.563007 |
| H  | -0.188279 | 1.257766  | -4.656201 |

|    |           |           |           |
|----|-----------|-----------|-----------|
| H  | -1.134713 | 2.754252  | -4.700064 |
| C  | 0.325610  | 2.536643  | -2.308213 |
| H  | 0.440786  | 3.520513  | -2.774978 |
| H  | 1.201237  | 1.945903  | -2.604550 |
| H  | 0.355153  | 2.705593  | -1.226542 |
| C  | -2.339281 | -2.617894 | 1.614537  |
| C  | -3.387592 | -2.705036 | 2.553941  |
| C  | -3.159978 | -3.401336 | 3.741936  |
| H  | -3.959731 | -3.481533 | 4.473093  |
| C  | -1.930429 | -3.989294 | 4.011043  |
| H  | -1.775456 | -4.532319 | 4.938287  |
| C  | -0.896087 | -3.864832 | 3.093131  |
| H  | 0.068470  | -4.314905 | 3.313370  |
| C  | -1.073942 | -3.172224 | 1.893728  |
| C  | -4.742949 | -2.052713 | 2.316241  |
| H  | -4.717257 | -1.575495 | 1.332860  |
| C  | -5.885695 | -3.078474 | 2.318224  |
| H  | -5.719066 | -3.880934 | 1.593512  |
| H  | -6.832298 | -2.588456 | 2.067604  |
| H  | -6.003245 | -3.541958 | 3.304105  |
| C  | -5.012848 | -0.949832 | 3.349196  |
| H  | -5.064242 | -1.360159 | 4.364363  |
| H  | -5.970446 | -0.461944 | 3.136603  |
| H  | -4.228284 | -0.190289 | 3.313685  |
| C  | 0.097772  | -3.036658 | 0.932336  |
| H  | -0.230800 | -2.374319 | 0.123398  |
| C  | 0.512621  | -4.367125 | 0.294236  |
| H  | 0.825804  | -5.089809 | 1.056138  |
| H  | 1.347986  | -4.213216 | -0.395768 |
| H  | -0.312546 | -4.809930 | -0.270442 |
| C  | 1.305714  | -2.386349 | 1.626060  |
| H  | 1.011640  | -1.479044 | 2.172072  |
| H  | 2.101337  | -2.166870 | 0.899334  |
| H  | 1.755951  | -3.051983 | 2.369246  |
| Ca | 1.072474  | 0.315723  | 0.074743  |
| N  | 2.709669  | 1.967515  | 0.607787  |
| N  | 2.886171  | -0.308096 | -1.391286 |
| C  | 4.385591  | 3.711423  | 0.165641  |
| H  | 3.779705  | 4.597619  | -0.052261 |
| H  | 5.317869  | 3.790228  | -0.395375 |
| H  | 4.608373  | 3.730120  | 1.235488  |
| C  | 3.619524  | 2.458184  | -0.210260 |
| C  | 3.942700  | 1.882955  | -1.466460 |
| H  | 4.616995  | 2.476911  | -2.072854 |
| C  | 3.672055  | 0.597824  | -1.973833 |
| C  | 4.329318  | 0.260378  | -3.300519 |
| H  | 4.745164  | -0.749827 | -3.304049 |
| H  | 5.118139  | 0.970131  | -3.553250 |
| H  | 3.571085  | 0.293736  | -4.091515 |

|   |           |           |           |
|---|-----------|-----------|-----------|
| C | 2.512074  | 2.487917  | 1.916339  |
| C | 1.729057  | 3.637999  | 2.144058  |
| C | 1.511802  | 4.046855  | 3.461909  |
| H | 0.909190  | 4.930582  | 3.651703  |
| C | 2.034403  | 3.338775  | 4.534879  |
| H | 1.853781  | 3.674597  | 5.551165  |
| C | 2.767232  | 2.180341  | 4.301876  |
| H | 3.147918  | 1.615727  | 5.146838  |
| C | 3.005239  | 1.729412  | 3.003869  |
| C | 1.063989  | 4.397820  | 1.006589  |
| H | 1.476653  | 4.020973  | 0.066340  |
| C | 1.347314  | 5.904957  | 1.055390  |
| H | 0.873390  | 6.375676  | 1.923191  |
| H | 0.947292  | 6.392486  | 0.160296  |
| H | 2.420849  | 6.111370  | 1.110373  |
| C | -0.449628 | 4.130735  | 0.993606  |
| H | -0.675875 | 3.059062  | 0.941866  |
| H | -0.926235 | 4.612759  | 0.133639  |
| H | -0.919437 | 4.516142  | 1.905036  |
| C | 3.794595  | 0.453004  | 2.749772  |
| C | 2.967526  | -1.667031 | -1.805928 |
| C | 2.092488  | -2.198392 | -2.774451 |
| C | 2.188953  | -3.554515 | -3.100685 |
| H | 1.516525  | -3.972524 | -3.844781 |
| C | 3.129617  | -4.377556 | -2.499931 |
| H | 3.195155  | -5.425914 | -2.773627 |
| C | 3.976031  | -3.851659 | -1.529693 |
| H | 4.698847  | -4.503505 | -1.048961 |
| C | 3.903375  | -2.510212 | -1.156511 |
| C | 1.054996  | -1.343104 | -3.485346 |
| H | 1.222681  | -0.300845 | -3.190964 |
| C | -0.367766 | -1.731621 | -3.063734 |
| H | -0.570543 | -2.787589 | -3.272346 |
| H | -1.112098 | -1.135846 | -3.601622 |
| H | -0.539740 | -1.572722 | -1.992658 |
| C | 1.204153  | -1.417699 | -5.011543 |
| H | 2.222357  | -1.170755 | -5.326717 |
| H | 0.513035  | -0.722515 | -5.498699 |
| H | 0.974771  | -2.420855 | -5.385826 |
| C | 4.828962  | -1.959439 | -0.079992 |
| H | 4.336470  | -1.075663 | 0.337728  |
| C | 6.168665  | -1.488150 | -0.665080 |
| H | 6.678427  | -2.313351 | -1.175552 |
| H | 6.824350  | -1.122414 | 0.132477  |
| H | 6.032679  | -0.673450 | -1.379756 |
| C | 5.076073  | -2.951941 | 1.062083  |
| H | 4.139553  | -3.354737 | 1.459727  |
| H | 5.608891  | -2.454915 | 1.879141  |
| H | 5.697745  | -3.795525 | 0.743495  |

|   |          |           |          |
|---|----------|-----------|----------|
| C | 3.663099 | -0.588047 | 3.865068 |
| H | 4.204242 | -0.288737 | 4.769152 |
| H | 2.616592 | -0.758267 | 4.137015 |
| H | 3.391787 | 0.001022  | 1.834889 |
| C | 5.271137 | 0.758403  | 2.460439 |
| H | 5.381816 | 1.382940  | 1.570085 |
| H | 5.830439 | -0.167729 | 2.290219 |
| H | 5.725714 | 1.281610  | 3.308907 |
| H | 4.087964 | -1.540354 | 3.532897 |

147

LCa( $\mu$ -  
H)AIL

|    |          |           |           |
|----|----------|-----------|-----------|
| Al | 1.748269 | -0.086691 | -0.247644 |
| N  | 2.850328 | 0.561194  | 1.259622  |
| N  | 2.776809 | -1.765962 | -0.346026 |
| C  | 3.595409 | -1.632494 | 1.909187  |
| H  | 4.060657 | -2.196784 | 2.707187  |
| C  | 3.444419 | -0.252695 | 2.127716  |
| C  | 2.859483 | 1.969011  | 1.529278  |
| C  | 3.369419 | -2.320505 | 0.707934  |
| C  | 2.776161 | -2.483074 | -1.585838 |
| C  | 3.793321 | 2.779699  | 0.854197  |
| C  | 1.931845 | 2.523561  | 2.429090  |
| C  | 4.023808 | 0.302087  | 3.408187  |
| H  | 4.654823 | 1.172701  | 3.209659  |
| H  | 4.612489 | -0.454374 | 3.927913  |
| H  | 3.222417 | 0.637057  | 4.072788  |
| C  | 3.869714 | -3.742321 | 0.617677  |
| H  | 3.057703 | -4.418035 | 0.333540  |
| H  | 4.289200 | -4.070091 | 1.569304  |
| H  | 4.638462 | -3.831676 | -0.155576 |
| C  | 4.694476 | 2.189283  | -0.222366 |
| H  | 4.103821 | 1.421295  | -0.736767 |
| C  | 3.849677 | -2.301699 | -2.475972 |
| C  | 1.694685 | -3.321245 | -1.911273 |
| C  | 2.998339 | 4.680298  | 2.139381  |
| H  | 3.066704 | 5.734450  | 2.390053  |
| C  | 3.852052 | 4.133990  | 1.186935  |
| H  | 4.569047 | 4.778984  | 0.690440  |
| C  | 2.031106 | 3.882413  | 2.734878  |
| H  | 1.328403 | 4.326642  | 3.434484  |
| C  | 4.993580 | -1.350250 | -2.159024 |
| H  | 4.847700 | -0.975672 | -1.141835 |
| C  | 5.932347 | 1.497235  | 0.365383  |
| H  | 6.542107 | 2.209166  | 0.933572  |
| H  | 6.551822 | 1.085746  | -0.439665 |
| H  | 5.660544 | 0.670419  | 1.026593  |
| C  | 1.720322 | -3.998513 | -3.131346 |

|    |           |           |           |
|----|-----------|-----------|-----------|
| H  | 0.893533  | -4.650986 | -3.398985 |
| C  | 4.963107  | -0.138822 | -3.100046 |
| H  | 5.099097  | -0.444812 | -4.143378 |
| H  | 5.769660  | 0.557678  | -2.847031 |
| H  | 4.009066  | 0.392521  | -3.023573 |
| C  | 5.106747  | 3.215479  | -1.281463 |
| H  | 4.237296  | 3.747704  | -1.678730 |
| H  | 5.602549  | 2.709400  | -2.114667 |
| H  | 5.813800  | 3.953105  | -0.885418 |
| C  | 3.832691  | -2.996053 | -3.686744 |
| H  | 4.652328  | -2.866908 | -4.388404 |
| C  | 0.762786  | 1.710816  | 2.965732  |
| H  | 0.935277  | 0.659564  | 2.719122  |
| C  | 2.782490  | -3.845007 | -4.014201 |
| H  | 2.786947  | -4.378304 | -4.959856 |
| C  | 0.486778  | -3.442802 | -0.995038 |
| H  | 0.723568  | -2.944261 | -0.050846 |
| C  | -0.507144 | 2.151906  | 2.224610  |
| H  | -0.799804 | 3.169965  | 2.504078  |
| H  | -1.361740 | 1.499304  | 2.436467  |
| H  | -0.313692 | 2.189332  | 1.146282  |
| C  | -0.701964 | -2.692533 | -1.615189 |
| H  | -0.370901 | -1.700134 | -1.955973 |
| H  | -1.529852 | -2.627065 | -0.895928 |
| H  | -1.085521 | -3.203854 | -2.504930 |
| C  | 6.359951  | -2.045905 | -2.200132 |
| H  | 6.389986  | -2.910043 | -1.529063 |
| H  | 7.147149  | -1.350050 | -1.891126 |
| H  | 6.604379  | -2.396643 | -3.208792 |
| C  | 0.099261  | -4.889049 | -0.671440 |
| H  | -0.220683 | -5.434816 | -1.566095 |
| H  | -0.729279 | -4.900820 | 0.043804  |
| H  | 0.939361  | -5.434370 | -0.230412 |
| C  | 0.560058  | 1.815410  | 4.479933  |
| H  | 1.452735  | 1.508281  | 5.033161  |
| H  | -0.267947 | 1.168679  | 4.789185  |
| H  | 0.311344  | 2.836422  | 4.788151  |
| Ca | -1.201143 | 0.142506  | -0.245007 |
| H  | 0.535101  | -0.799665 | 0.844538  |
| N  | -2.927354 | -0.606043 | 1.265614  |
| N  | -2.797338 | 1.882423  | -0.550163 |
| C  | -4.142566 | 1.496730  | 1.429811  |
| H  | -4.908787 | 1.970258  | 2.033542  |
| C  | -3.835678 | 0.175816  | 1.831239  |
| C  | -2.856064 | -1.991109 | 1.593531  |
| C  | -3.771276 | 2.226509  | 0.280052  |
| C  | -2.643937 | 2.574273  | -1.787780 |
| C  | -3.547226 | -2.904377 | 0.758038  |
| C  | -2.047682 | -2.466251 | 2.648980  |

|   |           |           |           |
|---|-----------|-----------|-----------|
| C | -4.662174 | -0.317751 | 3.008255  |
| H | -4.626161 | -1.402037 | 3.118948  |
| H | -5.704837 | -0.008218 | 2.906533  |
| H | -4.275498 | 0.134465  | 3.927626  |
| C | -4.595959 | 3.462755  | -0.019588 |
| H | -3.960817 | 4.350958  | -0.078360 |
| H | -5.362322 | 3.627545  | 0.738327  |
| H | -5.083474 | 3.359813  | -0.994616 |
| C | -4.375640 | -2.403225 | -0.419730 |
| H | -3.863327 | -1.517458 | -0.817069 |
| C | -3.214867 | 2.000889  | -2.945034 |
| C | -1.854597 | 3.739755  | -1.887162 |
| C | -2.693479 | -4.742505 | 2.091212  |
| H | -2.636647 | -5.808137 | 2.290921  |
| C | -3.460131 | -4.268993 | 1.032523  |
| H | -3.989108 | -4.980014 | 0.406853  |
| C | -1.988843 | -3.844102 | 2.877885  |
| H | -1.380455 | -4.219558 | 3.695789  |
| C | -3.979808 | 0.687619  | -2.869180 |
| H | -4.142907 | 0.460554  | -1.811519 |
| C | -5.776619 | -1.944946 | 0.012022  |
| H | -6.324789 | -2.775624 | 0.470502  |
| H | -6.346282 | -1.596181 | -0.856431 |
| H | -5.732327 | -1.124752 | 0.729896  |
| C | -1.678958 | 4.322978  | -3.143300 |
| H | -1.068613 | 5.217397  | -3.232284 |
| C | -3.135859 | -0.444423 | -3.474684 |
| H | -2.975872 | -0.282859 | -4.546009 |
| H | -3.617818 | -1.417724 | -3.343302 |
| H | -2.136318 | -0.498230 | -3.024276 |
| C | -4.496529 | -3.420065 | -1.559343 |
| H | -3.519708 | -3.798152 | -1.876610 |
| H | -4.980700 | -2.952186 | -2.422523 |
| H | -5.117732 | -4.276172 | -1.275642 |
| C | -3.014014 | 2.619441  | -4.179308 |
| H | -3.448727 | 2.183531  | -5.074941 |
| C | -1.275748 | -1.540099 | 3.578971  |
| H | -1.351424 | -0.526665 | 3.173454  |
| C | -2.256602 | 3.779272  | -4.283537 |
| H | -2.105908 | 4.249462  | -5.250296 |
| C | -1.157152 | 4.340865  | -0.676674 |
| H | -1.542465 | 3.830396  | 0.210131  |
| C | 0.213481  | -1.902022 | 3.660201  |
| H | 0.361338  | -2.890303 | 4.109563  |
| H | 0.741745  | -1.177220 | 4.290685  |
| H | 0.678126  | -1.891687 | 2.671649  |
| C | 0.358152  | 4.094329  | -0.744235 |
| H | 0.597620  | 3.033063  | -0.878199 |
| H | 0.851489  | 4.437309  | 0.171709  |



|   |           |           |           |
|---|-----------|-----------|-----------|
| H | 0.798570  | 4.634008  | -1.590704 |
| C | -5.360577 | 0.750398  | -3.530529 |
| H | -5.964712 | 1.554123  | -3.099433 |
| H | -5.894105 | -0.194823 | -3.381985 |
| H | -5.289246 | 0.923726  | -4.609662 |
| C | -1.449257 | 5.837523  | -0.504167 |
| H | -1.013781 | 6.428988  | -1.316671 |
| H | -1.012738 | 6.198193  | 0.433139  |
| H | -2.524232 | 6.043436  | -0.483118 |
| C | -1.887378 | -1.539275 | 4.989256  |
| H | -2.952332 | -1.297515 | 4.975605  |
| H | -1.376637 | -0.810442 | 5.628174  |
| H | -1.777114 | -2.524117 | 5.456882  |

147

LZn-  
Al(H)L

|    |          |           |           |
|----|----------|-----------|-----------|
| Al | 1.246771 | 0.410050  | -0.287631 |
| H  | 2.198064 | 0.337033  | 1.000127  |
| N  | 2.283985 | -0.415279 | -1.723260 |
| N  | 1.422915 | 2.210697  | -1.034731 |
| C  | 3.163530 | -0.665237 | -4.002661 |
| H  | 4.150437 | -1.027719 | -3.703283 |
| H  | 3.264879 | -0.078762 | -4.916181 |
| H  | 2.556533 | -1.550170 | -4.213669 |
| C  | 2.524528 | 0.151383  | -2.905529 |
| C  | 2.253659 | 1.496452  | -3.182097 |
| H  | 2.500537 | 1.843867  | -4.177064 |
| C  | 1.848472 | 2.482403  | -2.263655 |
| C  | 1.917022 | 3.912715  | -2.741538 |
| H  | 0.923346 | 4.253020  | -3.045061 |
| H  | 2.583424 | 3.997629  | -3.600399 |
| H  | 2.259503 | 4.583605  | -1.951094 |
| C  | 2.961894 | -1.646699 | -1.427528 |
| C  | 4.275128 | -1.570241 | -0.919793 |
| C  | 4.963489 | -2.758581 | -0.676759 |
| H  | 5.979370 | -2.717608 | -0.293570 |
| C  | 4.373386 | -3.993759 | -0.914848 |
| H  | 4.926571 | -4.908682 | -0.725856 |
| C  | 3.064168 | -4.050869 | -1.370260 |
| H  | 2.595043 | -5.018812 | -1.524009 |
| C  | 2.332875 | -2.887620 | -1.621861 |
| C  | 4.952914 | -0.239040 | -0.628121 |
| H  | 4.235806 | 0.557341  | -0.839550 |
| C  | 6.174075 | -0.008351 | -1.528547 |
| H  | 6.944671 | -0.768600 | -1.358805 |
| H  | 6.617403 | 0.971075  | -1.320261 |
| H  | 5.902984 | -0.035103 | -2.588438 |
| C  | 5.329895 | -0.124247 | 0.853875  |

|    |           |           |           |
|----|-----------|-----------|-----------|
| H  | 4.443139  | -0.231050 | 1.485134  |
| H  | 5.775290  | 0.857176  | 1.050464  |
| H  | 6.061916  | -0.886198 | 1.144168  |
| C  | 0.882408  | -2.997914 | -2.056102 |
| H  | 0.510953  | -1.982154 | -2.217141 |
| C  | 0.713216  | -3.776533 | -3.365731 |
| H  | 1.249360  | -3.303827 | -4.194402 |
| H  | -0.346097 | -3.831740 | -3.634531 |
| H  | 1.083667  | -4.802903 | -3.271894 |
| C  | 0.036537  | -3.635878 | -0.945862 |
| H  | 0.342483  | -4.671194 | -0.758374 |
| H  | -1.023447 | -3.643827 | -1.218767 |
| H  | 0.137355  | -3.088679 | -0.003233 |
| C  | 1.040717  | 3.296049  | -0.172726 |
| C  | 1.933366  | 3.723598  | 0.829415  |
| C  | 1.546885  | 4.786086  | 1.649858  |
| H  | 2.227506  | 5.137985  | 2.419299  |
| C  | 0.316517  | 5.409481  | 1.493317  |
| H  | 0.036410  | 6.235668  | 2.139557  |
| C  | -0.558282 | 4.962557  | 0.512606  |
| H  | -1.528639 | 5.439161  | 0.406825  |
| C  | -0.222315 | 3.901494  | -0.329525 |
| C  | 3.314822  | 3.110416  | 1.004409  |
| H  | 3.357464  | 2.200845  | 0.402924  |
| C  | 4.405570  | 4.058065  | 0.486813  |
| H  | 4.248870  | 4.307592  | -0.567786 |
| H  | 5.391036  | 3.588380  | 0.579565  |
| H  | 4.422263  | 4.994516  | 1.055941  |
| C  | 3.571956  | 2.693471  | 2.456135  |
| H  | 3.568298  | 3.552518  | 3.136291  |
| H  | 4.550422  | 2.211103  | 2.541719  |
| H  | 2.813046  | 1.980039  | 2.789274  |
| C  | -1.241930 | 3.420300  | -1.350058 |
| H  | -0.773442 | 2.657637  | -1.978350 |
| C  | -1.749693 | 4.544041  | -2.265968 |
| H  | -2.355695 | 5.266752  | -1.708974 |
| H  | -2.382903 | 4.123027  | -3.053457 |
| H  | -0.934055 | 5.098296  | -2.739169 |
| C  | -2.432194 | 2.764458  | -0.646067 |
| H  | -2.108433 | 1.939149  | -0.004313 |
| H  | -3.142394 | 2.371380  | -1.377173 |
| H  | -2.955848 | 3.493385  | -0.017028 |
| Zn | -0.963274 | -0.594527 | 0.153193  |
| N  | -1.120337 | -1.531099 | 1.992297  |
| N  | -2.748385 | -1.266881 | -0.407611 |
| C  | -2.023968 | -3.189011 | 3.584797  |
| H  | -1.555852 | -4.177892 | 3.533819  |
| H  | -3.068200 | -3.332387 | 3.872966  |
| H  | -1.514036 | -2.609541 | 4.355493  |

|   |           |           |           |
|---|-----------|-----------|-----------|
| C | -1.947780 | -2.521871 | 2.229160  |
| C | -2.819126 | -3.044848 | 1.234032  |
| H | -3.317337 | -3.972775 | 1.492030  |
| C | -3.222913 | -2.438645 | 0.046990  |
| C | -4.238410 | -3.179722 | -0.798510 |
| H | -5.049962 | -2.533151 | -1.137282 |
| H | -4.660804 | -4.031408 | -0.263198 |
| H | -3.734281 | -3.550202 | -1.699610 |
| C | -0.249984 | -0.985656 | 2.980997  |
| C | 0.916384  | -1.663776 | 3.379065  |
| C | 1.797311  | -1.018366 | 4.250216  |
| H | 2.706442  | -1.527182 | 4.558540  |
| C | 1.547972  | 0.265011  | 4.711106  |
| H | 2.252854  | 0.754521  | 5.376187  |
| C | 0.394910  | 0.926724  | 4.305312  |
| H | 0.208505  | 1.934203  | 4.662330  |
| C | -0.516279 | 0.321118  | 3.441972  |
| C | 1.278134  | -3.048319 | 2.866822  |
| H | 0.466831  | -3.400461 | 2.223838  |
| C | 1.439947  | -4.061358 | 4.009255  |
| H | 2.301975  | -3.813527 | 4.638011  |
| H | 1.604528  | -5.065891 | 3.604837  |
| H | 0.557226  | -4.090007 | 4.654678  |
| C | 2.546912  | -2.996002 | 2.009250  |
| H | 2.448414  | -2.267416 | 1.201769  |
| H | 2.754765  | -3.973494 | 1.564108  |
| H | 3.417248  | -2.704870 | 2.607822  |
| C | -1.810213 | 1.026503  | 3.068834  |
| C | -3.567157 | -0.503951 | -1.290571 |
| C | -3.256166 | -0.389806 | -2.657559 |
| C | -4.059639 | 0.419056  | -3.465674 |
| H | -3.820293 | 0.524311  | -4.520444 |
| C | -5.173004 | 1.070466  | -2.953914 |
| H | -5.799120 | 1.676825  | -3.601190 |
| C | -5.475378 | 0.945262  | -1.602875 |
| H | -6.341446 | 1.466066  | -1.205361 |
| C | -4.672181 | 0.192687  | -0.746420 |
| C | -2.087923 | -1.134727 | -3.280368 |
| H | -1.679098 | -1.796640 | -2.511655 |
| C | -0.975290 | -0.171143 | -3.711423 |
| H | -1.333240 | 0.533987  | -4.470171 |
| H | -0.127989 | -0.720811 | -4.137202 |
| H | -0.605341 | 0.406828  | -2.859428 |
| C | -2.541002 | -2.013421 | -4.454148 |
| H | -3.311139 | -2.725674 | -4.141043 |
| H | -1.694640 | -2.575931 | -4.860673 |
| H | -2.955240 | -1.412941 | -5.270872 |
| C | -4.994792 | 0.154208  | 0.744447  |
| H | -4.120569 | -0.251438 | 1.262477  |

|   |           |           |          |
|---|-----------|-----------|----------|
| C | -6.185763 | -0.765539 | 1.052168 |
| H | -7.086265 | -0.423463 | 0.528869 |
| H | -6.396689 | -0.764880 | 2.126884 |
| H | -5.990997 | -1.797835 | 0.752673 |
| C | -5.255817 | 1.554380  | 1.314360 |
| H | -4.396076 | 2.211067  | 1.161401 |
| H | -5.450644 | 1.490002  | 2.389122 |
| H | -6.130369 | 2.028652  | 0.857413 |
| C | -1.679681 | 2.548125  | 2.992926 |
| H | -1.546164 | 3.000237  | 3.981774 |
| H | -0.834777 | 2.843778  | 2.364103 |
| H | -2.111418 | 0.681841  | 2.072462 |
| C | -2.923778 | 0.604827  | 4.038712 |
| H | -3.100679 | -0.474483 | 3.992031 |
| H | -3.861281 | 1.114897  | 3.799641 |
| H | -2.647985 | 0.859190  | 5.068169 |
| H | -2.588659 | 2.978581  | 2.560828 |

74

LMgH

|    |           |           |           |
|----|-----------|-----------|-----------|
| Mg | 0.000000  | 0.000012  | -0.939902 |
| N  | -1.467549 | 0.000002  | 0.471549  |
| N  | 1.467549  | 0.000008  | 0.471549  |
| C  | -2.470600 | -0.000065 | 2.706309  |
| C  | -1.270382 | -0.000020 | 1.786464  |
| C  | 0.000000  | -0.000007 | 2.392986  |
| C  | 1.270382  | 0.000013  | 1.786464  |
| C  | 2.470600  | 0.000028  | 2.706309  |
| C  | -2.801719 | -0.000011 | -0.042288 |
| C  | -3.427907 | -1.226184 | -0.334450 |
| C  | -4.691483 | -1.202510 | -0.926425 |
| C  | -5.322462 | -0.000030 | -1.221896 |
| C  | -4.691537 | 1.202461  | -0.926347 |
| C  | -3.427961 | 1.226156  | -0.334377 |
| C  | -2.722520 | -2.545674 | -0.058785 |
| C  | -3.640290 | -3.597080 | 0.575141  |
| C  | -2.077358 | -3.086156 | -1.344435 |
| C  | -2.722617 | 2.545655  | -0.058643 |
| C  | -3.640447 | 3.597054  | 0.575205  |
| C  | -2.077355 | 3.086152  | -1.344237 |
| C  | 2.801719  | 0.000015  | -0.042288 |
| C  | 3.427918  | 1.226186  | -0.334442 |
| C  | 4.691493  | 1.202505  | -0.926417 |
| C  | 5.322461  | 0.000022  | -1.221896 |
| C  | 4.691527  | -1.202466 | -0.926356 |
| C  | 3.427951  | -1.226153 | -0.334385 |
| C  | 2.722538  | 2.545681  | -0.058773 |
| C  | 2.077362  | 3.086159  | -1.344417 |
| C  | 3.640318  | 3.597087  | 0.575135  |

|   |           |           |           |
|---|-----------|-----------|-----------|
| C | 2.722599  | -2.545649 | -0.058654 |
| C | 3.640419  | -3.597045 | 0.575212  |
| C | 2.077352  | -3.086149 | -1.344254 |
| H | -1.917022 | 2.348389  | 0.655087  |
| H | -5.189712 | 2.137073  | -1.166412 |
| H | 1.916996  | -2.348377 | 0.655065  |
| H | 5.189693  | -2.137081 | -1.166426 |
| H | -1.916869 | -2.348401 | 0.654880  |
| H | 6.303916  | 0.000024  | -1.685787 |
| H | 0.000000  | -0.000016 | 3.475783  |
| H | 5.189631  | 2.137123  | -1.166537 |
| H | -5.189613 | -2.137131 | -1.166551 |
| H | 1.916895  | 2.348413  | 0.654902  |
| H | 3.058828  | -4.478880 | 0.862567  |
| H | 3.096650  | 0.878022  | 2.517584  |
| H | -6.303916 | -0.000037 | -1.685786 |
| H | -3.058679 | -4.478923 | 0.862430  |
| H | 1.406511  | -2.352440 | -1.805963 |
| H | 3.096652  | -0.877971 | 2.517612  |
| H | 2.168971  | 0.000044  | 3.753960  |
| H | -3.096637 | -0.878066 | 2.517571  |
| H | -1.501869 | -3.995131 | -1.139016 |
| H | -3.058859 | 4.478888  | 0.862570  |
| H | -2.168971 | -0.000091 | 3.753959  |
| H | 4.134046  | -3.206250 | 1.470588  |
| H | 2.844770  | -3.327196 | -2.088056 |
| H | 4.418550  | 3.932416  | -0.118501 |
| H | -3.096666 | 0.877927  | 2.517624  |
| H | -1.406549 | -2.352436 | -1.806173 |
| H | 1.501879  | -3.995123 | -1.138787 |
| H | -1.406512 | 2.352440  | -1.805939 |
| H | -4.418536 | -3.932406 | -0.118480 |
| H | -4.418616 | 3.932402  | -0.118492 |
| H | 4.418602  | -3.932392 | -0.118469 |
| H | -4.133838 | -3.206298 | 1.470566  |
| H | 1.406551  | 2.352438  | -1.806150 |
| H | 4.133883  | 3.206307  | 1.470552  |
| H | -1.501881 | 3.995124  | -1.138765 |
| H | -2.844765 | 3.327199  | -2.088047 |
| H | 3.058711  | 4.478930  | 0.862433  |
| H | 2.844820  | 3.327201  | -2.088179 |
| H | 1.501872  | 3.995133  | -1.138995 |
| H | 0.000000  | 0.000032  | -2.658218 |
| H | -2.844824 | -3.327197 | -2.088189 |
| H | -4.134092 | 3.206261  | 1.470572  |

74

LCaH

|    |          |           |           |
|----|----------|-----------|-----------|
| Ca | 0.000083 | -0.180917 | -1.336253 |
|----|----------|-----------|-----------|

|   |           |           |           |
|---|-----------|-----------|-----------|
| N | 1.478646  | -0.110086 | 0.538967  |
| N | -1.478375 | -0.111396 | 0.539017  |
| C | 2.467962  | -0.093603 | 2.779438  |
| C | 1.273867  | -0.129807 | 1.848204  |
| C | 0.000228  | -0.169769 | 2.451066  |
| C | -1.273471 | -0.131673 | 1.848245  |
| C | -2.467568 | -0.097837 | 2.779566  |
| C | 2.799336  | -0.000446 | 0.021058  |
| C | 3.315836  | 1.276246  | -0.289089 |
| C | 4.556955  | 1.363836  | -0.921116 |
| C | 5.280590  | 0.222773  | -1.245529 |
| C | 4.761725  | -1.029557 | -0.939862 |
| C | 3.524923  | -1.165091 | -0.307801 |
| C | 2.525241  | 2.538419  | 0.024878  |
| C | 3.341595  | 3.556671  | 0.830672  |
| C | 1.980499  | 3.178441  | -1.261193 |
| C | 2.960288  | -2.547109 | -0.015349 |
| C | 3.947636  | -3.435584 | 0.751778  |
| C | 2.504496  | -3.236965 | -1.310472 |
| C | -2.799205 | -0.003539 | 0.021094  |
| C | -3.521240 | -1.169098 | -0.312225 |
| C | -4.758028 | -1.034960 | -0.944681 |
| C | -5.280245 | 0.216882  | -1.246424 |
| C | -4.560214 | 1.358924  | -0.917321 |
| C | -3.319364 | 1.272764  | -0.284627 |
| C | -2.953358 | -2.550577 | -0.023463 |
| C | -2.498886 | -3.237623 | -1.320543 |
| C | -3.937726 | -3.441943 | 0.744188  |
| C | -2.532794 | 2.536062  | 0.034875  |
| C | -3.354186 | 3.550674  | 0.840155  |
| C | -1.985003 | 3.180107  | -1.247842 |
| H | 2.079290  | -2.415360 | 0.619872  |
| H | 5.327694  | -1.918499 | -1.204419 |
| H | -1.677413 | 2.246930  | 0.652626  |
| H | -4.969326 | 2.335071  | -1.163306 |
| H | 1.668520  | 2.248622  | 0.640512  |
| H | -6.241615 | 0.301983  | -1.742969 |
| H | 0.000241  | -0.194319 | 3.534067  |
| H | -5.321238 | -1.924652 | -1.212610 |
| H | 4.963324  | 2.340328  | -1.170299 |
| H | -2.071445 | -2.418260 | 0.610388  |
| H | -2.728873 | 4.401416  | 1.129858  |
| H | -3.137538 | -0.939025 | 2.574775  |
| H | 6.242126  | 0.308905  | -1.741575 |
| H | 2.713696  | 4.407172  | 1.115464  |
| H | -1.382305 | 2.480610  | -1.841212 |
| H | -3.050903 | 0.814408  | 2.617006  |
| H | -2.163309 | -0.136929 | 3.825950  |
| H | 3.051205  | 0.818298  | 2.614711  |

|   |           |           |           |
|---|-----------|-----------|-----------|
| H | 1.349866  | 4.043258  | -1.030672 |
| H | 3.470629  | -4.381293 | 1.028750  |
| H | 2.163697  | -0.130366 | 3.825902  |
| H | -3.757451 | 3.098096  | 1.751059  |
| H | -2.800002 | 3.514144  | -1.898658 |
| H | -4.820882 | -3.681803 | 0.142624  |
| H | 3.138042  | -0.935191 | 2.576629  |
| H | 1.382866  | 2.475953  | -1.856196 |
| H | -1.358219 | 4.046635  | -1.013233 |
| H | 1.794096  | -2.625876 | -1.881208 |
| H | 4.185581  | 3.947849  | 0.252666  |
| H | 4.829662  | -3.675739 | 0.148687  |
| H | -4.196494 | 3.942147  | 0.259921  |
| H | 3.741937  | 3.107348  | 1.744461  |
| H | -1.791024 | -2.624304 | -1.892061 |
| H | -4.281116 | -2.954943 | 1.662012  |
| H | 2.026698  | -4.198010 | -1.093207 |
| H | 3.355587  | -3.422485 | -1.974484 |
| H | -3.458908 | -4.387652 | 1.018019  |
| H | -3.350968 | -3.424079 | -1.983013 |
| H | -2.018654 | -4.197983 | -1.105623 |
| H | 0.000374  | -0.351356 | -3.446732 |
| H | 2.797072  | 3.514186  | -1.909165 |
| H | 4.292600  | -2.946230 | 1.667760  |

74

LZnH

|    |           |           |           |
|----|-----------|-----------|-----------|
| Zn | 0.000000  | 0.000052  | -0.783901 |
| N  | 1.455281  | 0.000095  | 0.532617  |
| N  | -1.455281 | -0.000077 | 0.532617  |
| C  | 2.474179  | 0.000103  | 2.757031  |
| C  | 1.266727  | 0.000071  | 1.848404  |
| C  | 0.000000  | -0.000031 | 2.458648  |
| C  | -1.266727 | -0.000113 | 1.848404  |
| C  | -2.474179 | -0.000211 | 2.757030  |
| C  | 2.783608  | 0.000167  | 0.003423  |
| C  | 3.406573  | 1.226801  | -0.288709 |
| C  | 4.667913  | 1.202809  | -0.885491 |
| C  | 5.297549  | 0.000274  | -1.183671 |
| C  | 4.668193  | -1.202315 | -0.885114 |
| C  | 3.406847  | -1.226416 | -0.288351 |
| C  | 2.704531  | 2.547164  | -0.009475 |
| C  | 3.622934  | 3.587124  | 0.642401  |
| C  | 2.073190  | 3.099471  | -1.296557 |
| C  | 2.705119  | -2.546851 | -0.008667 |
| C  | 3.623746  | -3.586359 | 0.643609  |
| C  | 2.073956  | -3.099781 | -1.295571 |
| C  | -2.783608 | -0.000163 | 0.003423  |
| C  | -3.406549 | -1.226806 | -0.288725 |

|   |           |           |           |
|---|-----------|-----------|-----------|
| C | -4.667890 | -1.202830 | -0.885504 |
| C | -5.297549 | -0.000304 | -1.183671 |
| C | -4.668215 | 1.202293  | -0.885102 |
| C | -3.406870 | 1.226411  | -0.288336 |
| C | -2.704483 | -2.547158 | -0.009501 |
| C | -2.073127 | -3.099442 | -1.296585 |
| C | -3.622868 | -3.587142 | 0.642361  |
| C | -2.705167 | 2.546857  | -0.008642 |
| C | -3.623812 | 3.586341  | 0.643649  |
| C | -2.074020 | 3.099811  | -1.295543 |
| H | 1.890704  | -2.348519 | 0.694534  |
| H | 5.165388  | -2.137077 | -1.126778 |
| H | -1.890744 | 2.348534  | 0.694554  |
| H | -5.165427 | 2.137049  | -1.126756 |
| H | 1.890182  | 2.348888  | 0.693816  |
| H | -6.277418 | -0.000358 | -1.651011 |
| H | 0.000000  | -0.000056 | 3.541273  |
| H | -5.164844 | -2.137641 | -1.127480 |
| H | 5.164883  | 2.137613  | -1.127458 |
| H | -1.890140 | -2.348873 | 0.693796  |
| H | -3.045400 | 4.469873  | 0.932302  |
| H | -3.098213 | -0.878448 | 2.563798  |
| H | 6.277418  | 0.000315  | -1.651011 |
| H | 3.044313  | 4.470627  | 0.930726  |
| H | -1.391668 | 2.374340  | -1.750660 |
| H | -3.098295 | 0.877987  | 2.563872  |
| H | -2.178930 | -0.000241 | 3.806523  |
| H | 3.098229  | 0.878339  | 2.563841  |
| H | 1.511522  | 4.016915  | -1.090083 |
| H | 3.045317  | -4.469881 | 0.932260  |
| H | 2.178930  | 0.000087  | 3.806523  |
| H | -4.106128 | 3.185276  | 1.540809  |
| H | -2.848180 | 3.331556  | -2.035521 |
| H | -4.410339 | -3.922514 | -0.040806 |
| H | 3.098279  | -0.878096 | 2.563830  |
| H | 1.390988  | 2.373654  | -1.751350 |
| H | -1.512565 | 4.017311  | -1.088744 |
| H | 1.391615  | -2.374295 | -1.750680 |
| H | 4.410418  | 3.922482  | -0.040758 |
| H | 4.411309  | -3.921806 | -0.039415 |
| H | -4.411389 | 3.921774  | -0.039365 |
| H | 4.105367  | 3.186524  | 1.539705  |
| H | -1.390936 | -2.373612 | -1.751371 |
| H | -4.105316 | -3.186558 | 1.539665  |
| H | 1.512484  | -4.017273 | -1.088777 |
| H | 2.848109  | -3.331534 | -2.035554 |
| H | -3.044230 | -4.470634 | 0.930685  |
| H | -2.847184 | -3.331099 | -2.036698 |
| H | -1.511443 | -4.016877 | -1.090116 |



|   |          |           |           |
|---|----------|-----------|-----------|
| H | 0.000000 | 0.000089  | -2.326851 |
| H | 2.847254 | 3.331119  | -2.036666 |
| H | 4.106079 | -3.185312 | 1.540767  |

73

|      |           |           |           |
|------|-----------|-----------|-----------|
| LAI' |           |           |           |
| AI   | -0.000002 | -0.224876 | -0.978596 |
| N    | -1.389161 | -0.137133 | 0.451449  |
| N    | 1.389159  | -0.137144 | 0.451450  |
| C    | -0.000002 | -0.204400 | 2.408410  |
| H    | -0.000002 | -0.231891 | 3.490488  |
| C    | -1.249421 | -0.160683 | 1.777638  |
| C    | -2.714730 | -0.010850 | -0.092265 |
| C    | 1.249418  | -0.160697 | 1.777638  |
| C    | 2.714731  | -0.010874 | -0.092261 |
| C    | -3.217721 | 1.274513  | -0.367307 |
| C    | -3.453079 | -1.166898 | -0.404298 |
| C    | -2.474853 | -0.124989 | 2.657682  |
| H    | -3.053317 | 0.784734  | 2.472344  |
| H    | -2.201545 | -0.161352 | 3.712738  |
| H    | -3.134642 | -0.967624 | 2.432232  |
| C    | 2.474850  | -0.125011 | 2.657684  |
| H    | 3.134667  | -0.967614 | 2.432193  |
| H    | 2.201543  | -0.161431 | 3.712739  |
| H    | 3.053284  | 0.784740  | 2.472390  |
| C    | -2.422910 | 2.534595  | -0.053604 |
| H    | -1.526942 | 2.239478  | 0.500519  |
| C    | 3.217753  | 1.274488  | -0.367260 |
| C    | 3.453053  | -1.166928 | -0.404337 |
| C    | -5.218530 | 0.249672  | -1.277963 |
| H    | -6.193459 | 0.350735  | -1.744691 |
| C    | -4.476113 | 1.380254  | -0.961984 |
| H    | -4.879448 | 2.363272  | -1.188299 |
| C    | -4.706280 | -1.010951 | -0.999188 |
| H    | -5.289216 | -1.891161 | -1.255028 |
| C    | 2.422968  | 2.534575  | -0.053514 |
| H    | 1.527023  | 2.239462  | 0.500649  |
| C    | -3.208479 | 3.507596  | 0.835908  |
| H    | -4.089481 | 3.903729  | 0.319823  |
| H    | -2.578143 | 4.358626  | 1.113695  |
| H    | -3.551330 | 3.023639  | 1.755935  |
| C    | 4.706256  | -1.010990 | -0.999225 |
| H    | 5.289170  | -1.891206 | -1.255095 |
| C    | 1.957148  | 3.223888  | -1.343879 |
| H    | 2.813062  | 3.558577  | -1.940435 |
| H    | 1.343165  | 4.100359  | -1.110441 |
| H    | 1.363595  | 2.542016  | -1.961101 |
| C    | -1.957145 | 3.223900  | -1.343993 |
| H    | -1.363629 | 2.542020  | -1.961240 |
| H    | -1.343140 | 4.100364  | -1.110586 |
| H    | -2.813082 | 3.558600  | -1.940510 |
| C    | 4.476143  | 1.380218  | -0.961938 |
| H    | 4.879502  | 2.363235  | -1.188222 |
| C    | -2.914066 | -2.563830 | -0.133003 |
| H    | -1.995620 | -2.461886 | 0.452765  |

|   |           |           |           |
|---|-----------|-----------|-----------|
| C | 5.218533  | 0.249630  | -1.277958 |
| H | 6.193463  | 0.350685  | -1.744686 |
| C | 2.914011  | -2.563857 | -0.133082 |
| H | 1.995547  | -2.461910 | 0.452658  |
| C | -2.545971 | -3.271173 | -1.445399 |
| H | -3.432880 | -3.414192 | -2.072845 |
| H | -2.112176 | -4.256149 | -1.241825 |
| H | -1.819872 | -2.685235 | -2.017505 |
| C | 2.545952  | -3.271175 | -1.445501 |
| H | 1.819883  | -2.685218 | -2.017625 |
| H | 2.112132  | -4.256147 | -1.241957 |
| H | 3.432880  | -3.414203 | -2.072917 |
| C | 3.208582  | 3.507568  | 0.835965  |
| H | 3.551489  | 3.023601  | 1.755967  |
| H | 2.578258  | 4.358592  | 1.113797  |
| H | 4.089553  | 3.903713  | 0.319835  |
| C | 3.890284  | -3.414400 | 0.690959  |
| H | 4.806265  | -3.632509 | 0.131728  |
| H | 3.428462  | -4.372118 | 0.951902  |
| H | 4.179988  | -2.911801 | 1.619314  |
| C | -3.890376 | -3.414349 | 0.691019  |
| H | -4.180120 | -2.911723 | 1.619347  |
| H | -3.428567 | -4.372061 | 0.952007  |
| H | -4.806332 | -3.632473 | 0.131755  |

12

C<sub>6</sub>H<sub>6</sub>

|   |           |           |           |
|---|-----------|-----------|-----------|
| C | -1.376989 | 0.218157  | -0.000041 |
| H | -2.449334 | 0.388097  | -0.000273 |
| C | -0.877436 | -1.083260 | 0.000065  |
| H | -1.560282 | -1.927396 | 0.000017  |
| C | 0.499580  | -1.301433 | 0.000040  |
| H | 0.888148  | -2.315261 | -0.000071 |
| C | 0.877382  | 1.083291  | 0.000034  |
| H | 1.560573  | 1.927140  | 0.000114  |
| C | -0.499526 | 1.301441  | 0.000009  |
| H | -0.888513 | 2.315098  | 0.000041  |
| C | 1.376993  | -0.218158 | -0.000026 |
| H | 2.449379  | -0.387900 | -0.000317 |

3

CaH<sub>2</sub>

|    |           |           |           |
|----|-----------|-----------|-----------|
| Ca | 0.000001  | 0.000128  | -0.000002 |
| H  | 1.098489  | -0.000455 | -1.793997 |
| H  | -1.098516 | -0.002107 | 1.794040  |

76

A1

|    |           |           |           |
|----|-----------|-----------|-----------|
| Al | -0.017718 | -0.680204 | -0.538266 |
| N  | -1.410936 | 0.108112  | 0.597648  |
| N  | 1.408868  | -0.003801 | 0.629924  |
| C  | -0.014512 | 0.215586  | 2.554406  |
| H  | -0.022022 | 0.345285  | 3.628862  |
| C  | -1.259392 | 0.287348  | 1.908835  |
| C  | -2.707654 | 0.336990  | 0.026677  |

|   |           |           |           |
|---|-----------|-----------|-----------|
| C | 1.244884  | 0.188952  | 1.937303  |
| C | 2.710131  | 0.213524  | 0.066421  |
| C | -2.963503 | 1.570046  | -0.604825 |
| C | -3.685756 | -0.671768 | 0.080958  |
| C | -2.459226 | 0.614009  | 2.766621  |
| H | -3.033416 | 1.441160  | 2.340880  |
| H | -2.153271 | 0.876505  | 3.779609  |
| H | -3.133582 | -0.245679 | 2.817454  |
| C | 2.450265  | 0.442444  | 2.809945  |
| H | 3.191139  | -0.352244 | 2.688259  |
| H | 2.164853  | 0.506587  | 3.860248  |
| H | 2.941813  | 1.376484  | 2.522665  |
| C | -1.855531 | 2.601789  | -0.778442 |
| H | -0.932929 | 2.039108  | -0.966803 |
| C | 3.057972  | 1.507799  | -0.361051 |
| C | 3.601848  | -0.863701 | -0.080535 |
| C | -5.249560 | 0.841251  | -0.982400 |
| H | -6.245491 | 1.047074  | -1.362175 |
| C | -4.251916 | 1.804126  | -1.088501 |
| H | -4.482942 | 2.748551  | -1.568875 |
| C | -4.958504 | -0.394469 | -0.421532 |
| H | -5.729585 | -1.158584 | -0.383050 |
| C | 2.085714  | 2.673374  | -0.259459 |
| H | 1.183310  | 2.318121  | 0.246230  |
| C | -1.628390 | 3.444292  | 0.484994  |
| H | -2.540388 | 3.987204  | 0.758314  |
| H | -0.835880 | 4.180335  | 0.308390  |
| H | -1.322566 | 2.831342  | 1.336405  |
| C | 4.857654  | -0.619643 | -0.638867 |
| H | 5.559313  | -1.440643 | -0.759107 |
| C | 1.670035  | 3.152670  | -1.656229 |
| H | 2.533905  | 3.515651  | -2.223811 |
| H | 0.953606  | 3.976596  | -1.575163 |
| H | 1.204574  | 2.343383  | -2.227687 |
| C | -2.078020 | 3.513611  | -1.988861 |
| H | -2.283312 | 2.934335  | -2.893784 |
| H | -1.183514 | 4.115851  | -2.169709 |
| H | -2.907530 | 4.211311  | -1.828570 |
| C | 4.323891  | 1.706096  | -0.914628 |
| H | 4.610000  | 2.698881  | -1.250986 |
| C | -3.350784 | -2.070342 | 0.577066  |
| H | -2.378919 | -2.033513 | 1.076969  |
| C | 5.223458  | 0.655985  | -1.049780 |
| H | 6.203924  | 0.829705  | -1.482059 |
| C | 3.206098  | -2.278759 | 0.311103  |
| H | 2.228535  | -2.232673 | 0.799554  |
| C | -3.197699 | -3.003655 | -0.635579 |
| H | -4.165086 | -3.220197 | -1.100645 |
| H | -2.744058 | -3.959972 | -0.346800 |
| H | -2.598582 | -2.499819 | -1.408166 |
| C | 3.051064  | -3.145270 | -0.948789 |
| H | 2.477885  | -2.596030 | -1.710051 |
| H | 2.577350  | -4.107695 | -0.714028 |
| H | 4.019316  | -3.367630 | -1.409269 |
| C | 2.650655  | 3.832942  | 0.571130  |

|    |           |           |           |
|----|-----------|-----------|-----------|
| H  | 2.947888  | 3.504274  | 1.571720  |
| H  | 1.896129  | 4.618475  | 0.684320  |
| H  | 3.527802  | 4.281470  | 0.092240  |
| C  | 4.188711  | -2.928715 | 1.292467  |
| H  | 5.183286  | -3.048427 | 0.849876  |
| H  | 3.832641  | -3.921955 | 1.584488  |
| H  | 4.298510  | -2.329254 | 2.200931  |
| C  | -4.371851 | -2.641912 | 1.566713  |
| H  | -4.513281 | -1.979058 | 2.425523  |
| H  | -4.031219 | -3.612454 | 1.941077  |
| H  | -5.350832 | -2.794383 | 1.100460  |
| Ca | -0.109115 | -3.303437 | -1.879178 |
| H  | -0.085677 | -2.327164 | 0.225752  |
| H  | -0.175065 | -5.226670 | -2.742457 |

76

|    |           |           |           |
|----|-----------|-----------|-----------|
| A2 |           |           |           |
| Al | -0.002036 | 0.565184  | -0.737666 |
| H  | -0.075309 | -0.575166 | -1.884146 |
| N  | 1.417459  | -0.070580 | 0.492060  |
| N  | -1.428653 | 0.037764  | 0.523902  |
| C  | 2.450725  | -0.315166 | 2.712890  |
| H  | 3.122816  | -1.075730 | 2.309861  |
| H  | 2.129482  | -0.614339 | 3.711051  |
| H  | 3.027283  | 0.610062  | 2.802658  |
| C  | 1.259351  | -0.091102 | 1.810065  |
| C  | 0.012140  | 0.073474  | 2.444919  |
| H  | 0.025856  | 0.067937  | 3.527329  |
| C  | -1.255133 | 0.007322  | 1.839116  |
| C  | -2.452781 | -0.131563 | 2.748033  |
| H  | -3.101892 | 0.743443  | 2.651313  |
| H  | -2.146803 | -0.226834 | 3.790034  |
| H  | -3.055341 | -1.001078 | 2.473836  |
| C  | 2.711375  | -0.341226 | -0.063423 |
| C  | 2.974286  | -1.633681 | -0.566285 |
| C  | 4.248156  | -1.897527 | -1.071162 |
| H  | 4.479712  | -2.885725 | -1.452667 |
| C  | 5.230731  | -0.914581 | -1.109421 |
| H  | 6.214959  | -1.143565 | -1.506089 |
| C  | 4.939774  | 0.364059  | -0.659434 |
| H  | 5.702378  | 1.135834  | -0.717519 |
| C  | 3.682328  | 0.676410  | -0.136323 |
| C  | 1.896403  | -2.710716 | -0.561797 |
| H  | 0.949735  | -2.202272 | -0.768548 |
| C  | 1.767394  | -3.405150 | 0.801628  |
| H  | 2.709847  | -3.887088 | 1.086718  |
| H  | 0.991776  | -4.178018 | 0.755190  |
| H  | 1.484292  | -2.705983 | 1.592406  |
| C  | 2.094838  | -3.752203 | -1.667345 |
| H  | 2.224759  | -3.277185 | -2.644250 |
| H  | 1.218282  | -4.402938 | -1.724474 |
| H  | 2.960396  | -4.396916 | -1.476848 |
| C  | 3.402807  | 2.109651  | 0.295722  |
| H  | 2.407993  | 2.131382  | 0.754884  |
| C  | 4.413346  | 2.638703  | 1.323424  |

|    |           |           |           |
|----|-----------|-----------|-----------|
| H  | 4.498288  | 1.976788  | 2.189152  |
| H  | 4.111883  | 3.629331  | 1.679114  |
| H  | 5.412507  | 2.736022  | 0.886360  |
| C  | 3.377667  | 3.037942  | -0.929784 |
| H  | 4.368769  | 3.116773  | -1.388429 |
| H  | 3.076830  | 4.057591  | -0.648998 |
| H  | 2.705331  | 2.641040  | -1.701101 |
| C  | -2.712920 | -0.271161 | -0.027971 |
| C  | -2.992450 | -1.611870 | -0.358931 |
| C  | -4.234758 | -1.914074 | -0.916766 |
| H  | -4.470157 | -2.944520 | -1.168073 |
| C  | -5.176671 | -0.921668 | -1.159447 |
| H  | -6.137481 | -1.175537 | -1.596298 |
| C  | -4.880128 | 0.397306  | -0.844341 |
| H  | -5.618238 | 1.170111  | -1.041531 |
| C  | -3.652512 | 0.746857  | -0.276586 |
| C  | -1.986972 | -2.724946 | -0.104699 |
| H  | -1.065689 | -2.265693 | 0.262642  |
| C  | -2.482780 | -3.696178 | 0.976002  |
| H  | -2.693856 | -3.179156 | 1.916976  |
| H  | -1.723453 | -4.459680 | 1.175772  |
| H  | -3.399168 | -4.207868 | 0.661108  |
| C  | -1.638584 | -3.474953 | -1.394972 |
| H  | -2.518782 | -3.957121 | -1.834124 |
| H  | -0.906189 | -4.260367 | -1.182111 |
| H  | -1.209312 | -2.792651 | -2.134125 |
| C  | -3.371780 | 2.207079  | 0.047880  |
| H  | -2.392011 | 2.248194  | 0.538878  |
| C  | -4.406752 | 2.809504  | 1.008448  |
| H  | -5.398441 | 2.856416  | 0.546612  |
| H  | -4.122443 | 3.829722  | 1.286445  |
| H  | -4.498582 | 2.219804  | 1.924658  |
| C  | -3.296306 | 3.046671  | -1.236859 |
| H  | -2.587736 | 2.604511  | -1.948776 |
| H  | -3.011622 | 4.085329  | -1.014965 |
| H  | -4.266660 | 3.088495  | -1.742294 |
| Ca | 0.054979  | 3.703887  | -1.139192 |
| H  | 0.056472  | 5.827954  | -1.221361 |

88

|    |           |           |           |
|----|-----------|-----------|-----------|
| A3 |           |           |           |
| Al | -0.370606 | -0.369673 | -0.915029 |
| N  | -2.016989 | -0.872636 | 0.063884  |
| N  | 0.684666  | -1.677570 | 0.140932  |
| C  | -1.218081 | -3.069175 | 0.613138  |
| H  | -1.525290 | -4.057258 | 0.931748  |
| C  | -2.239080 | -2.103663 | 0.500713  |
| C  | -3.075822 | 0.090500  | 0.062810  |
| C  | 0.162758  | -2.836893 | 0.539281  |
| C  | 2.078439  | -1.442959 | 0.338792  |
| C  | -3.116545 | 1.057465  | 1.091241  |
| C  | -4.006579 | 0.107239  | -0.991996 |
| C  | -3.629469 | -2.518500 | 0.921067  |
| H  | -4.108874 | -1.743633 | 1.524318  |
| H  | -3.605806 | -3.450546 | 1.487016  |

|   |           |           |           |
|---|-----------|-----------|-----------|
| H | -4.255003 | -2.666854 | 0.035358  |
| C | 1.080485  | -3.965459 | 0.949724  |
| H | 1.652374  | -4.309833 | 0.081610  |
| H | 0.514699  | -4.806932 | 1.350670  |
| H | 1.808868  | -3.639210 | 1.696335  |
| C | -2.051188 | 1.083027  | 2.181581  |
| H | -1.100881 | 0.835827  | 1.685405  |
| C | 2.495615  | -0.823492 | 1.533615  |
| C | 3.008736  | -1.796410 | -0.656526 |
| C | -5.097742 | 2.003449  | 0.055965  |
| H | -5.887870 | 2.747854  | 0.056767  |
| C | -4.145010 | 2.000570  | 1.069118  |
| H | -4.198980 | 2.758176  | 1.842621  |
| C | -5.017171 | 1.071864  | -0.968359 |
| H | -5.745127 | 1.101386  | -1.774056 |
| C | 1.494636  | -0.441040 | 2.613700  |
| H | 0.494218  | -0.581937 | 2.197094  |
| C | -2.279519 | 0.012549  | 3.258773  |
| H | -3.252393 | 0.154314  | 3.742809  |
| H | -1.504193 | 0.085027  | 4.030196  |
| H | -2.240151 | -0.998659 | 2.848037  |
| C | 4.363896  | -1.553769 | -0.417938 |
| H | 5.096195  | -1.824389 | -1.173310 |
| C | 1.618362  | 1.029232  | 3.024825  |
| H | 2.598453  | 1.256437  | 3.458588  |
| H | 0.860408  | 1.278798  | 3.773058  |
| H | 1.472120  | 1.693772  | 2.165592  |
| C | -1.891859 | 2.458999  | 2.838585  |
| H | -1.758871 | 3.262133  | 2.104625  |
| H | -1.017208 | 2.457133  | 3.495996  |
| H | -2.756366 | 2.708884  | 3.463717  |
| C | 3.859749  | -0.598946 | 1.728983  |
| H | 4.200660  | -0.142211 | 2.654775  |
| C | -3.902332 | -0.842401 | -2.176947 |
| H | -3.159985 | -1.609677 | -1.940391 |
| C | 4.793375  | -0.964764 | 0.765871  |
| H | 5.851257  | -0.789151 | 0.935728  |
| C | 2.560265  | -2.382384 | -1.985886 |
| H | 1.508604  | -2.667974 | -1.891494 |
| C | -3.383165 | -0.092945 | -3.412921 |
| H | -4.078723 | 0.700929  | -3.709311 |
| H | -3.267236 | -0.782758 | -4.255346 |
| H | -2.406097 | 0.356525  | -3.213671 |
| C | 2.630139  | -1.310914 | -3.084004 |
| H | 1.994505  | -0.456142 | -2.830638 |
| H | 2.275143  | -1.715206 | -4.037079 |
| H | 3.660135  | -0.957153 | -3.220125 |
| C | 1.615849  | -1.355151 | 3.840753  |
| H | 1.460853  | -2.403550 | 3.571255  |
| H | 0.864472  | -1.088174 | 4.591322  |
| H | 2.605162  | -1.267887 | 4.304162  |
| C | 3.357670  | -3.629703 | -2.385392 |
| H | 4.401816  | -3.391046 | -2.615907 |
| H | 2.920203  | -4.082370 | -3.280646 |
| H | 3.356074  | -4.380204 | -1.588411 |

|    |           |           |           |
|----|-----------|-----------|-----------|
| C  | -5.229606 | -1.545851 | -2.491403 |
| H  | -5.653065 | -2.032151 | -1.606776 |
| H  | -5.076269 | -2.309322 | -3.260737 |
| H  | -5.979399 | -0.843926 | -2.872259 |
| Ca | 0.194773  | 2.717514  | -0.523840 |
| H  | -0.552546 | -1.229028 | -2.298985 |
| H  | -0.560916 | 4.593807  | 0.170582  |
| C  | 3.395512  | 2.675164  | 0.061532  |
| C  | 3.021196  | 4.020338  | 0.029431  |
| C  | 2.612320  | 4.603175  | -1.173875 |
| C  | 2.583730  | 3.838454  | -2.343010 |
| C  | 2.951325  | 2.489679  | -2.306653 |
| C  | 3.351993  | 1.906527  | -1.104219 |
| H  | 3.706556  | 2.211784  | 0.992048  |
| H  | 3.029053  | 4.613140  | 0.938096  |
| H  | 2.295701  | 5.639974  | -1.190916 |
| H  | 2.910413  | 1.888471  | -3.209211 |
| H  | 2.270135  | 4.291691  | -3.278364 |
| H  | 3.614570  | 0.855165  | -1.065642 |

88

|     |           |           |           |
|-----|-----------|-----------|-----------|
| A4* |           |           |           |
| Al  | -0.000017 | -0.351432 | -0.251323 |
| N   | 1.441604  | 0.548233  | -1.109260 |
| N   | -1.441663 | 0.548261  | -1.109193 |
| C   | -0.000060 | 1.462388  | -2.813281 |
| H   | -0.000077 | 1.991346  | -3.757210 |
| C   | 1.263811  | 1.219098  | -2.245103 |
| C   | 2.743488  | 0.473429  | -0.505117 |
| C   | -1.263911 | 1.219108  | -2.245053 |
| C   | -2.743527 | 0.473446  | -0.505012 |
| C   | 3.128559  | 1.464182  | 0.418328  |
| C   | 3.579038  | -0.621932 | -0.792996 |
| C   | 2.469253  | 1.772179  | -2.961444 |
| H   | 3.013849  | 2.467029  | -2.316794 |
| H   | 2.180363  | 2.290598  | -3.875471 |
| H   | 3.165349  | 0.967056  | -3.212076 |
| C   | -2.469388 | 1.772106  | -2.961400 |
| H   | -3.165158 | 0.966836  | -3.212478 |
| H   | -2.180493 | 2.290950  | -3.875185 |
| H   | -3.014354 | 2.466524  | -2.316599 |
| C   | 2.221761  | 2.623949  | 0.802603  |
| H   | 1.266224  | 2.488569  | 0.289322  |
| C   | -3.128522 | 1.464142  | 0.418526  |
| C   | -3.579138 | -0.621850 | -0.792963 |
| C   | 5.238968  | 0.298791  | 0.715127  |
| H   | 6.213960  | 0.234712  | 1.188040  |
| C   | 4.389041  | 1.356942  | 1.009258  |
| H   | 4.707527  | 2.112891  | 1.721120  |
| C   | 4.828822  | -0.685662 | -0.174210 |
| H   | 5.486980  | -1.524012 | -0.384878 |
| C   | -2.221663 | 2.623853  | 0.802826  |
| H   | -1.266106 | 2.488382  | 0.289608  |
| C   | 2.809835  | 3.974033  | 0.368795  |
| H   | 3.761366  | 4.174763  | 0.873475  |

|    |           |           |           |
|----|-----------|-----------|-----------|
| H  | 2.119793  | 4.785157  | 0.623165  |
| H  | 2.990156  | 4.012659  | -0.710035 |
| C  | -4.828904 | -0.685574 | -0.174138 |
| H  | -5.487106 | -1.523876 | -0.384851 |
| C  | -1.926298 | 2.613494  | 2.308530  |
| H  | -2.835541 | 2.777395  | 2.897726  |
| H  | -1.220311 | 3.412631  | 2.556701  |
| H  | -1.479879 | 1.661485  | 2.609067  |
| C  | 1.926320  | 2.613565  | 2.308294  |
| H  | 1.479799  | 1.661586  | 2.608773  |
| H  | 1.220398  | 3.412759  | 2.556462  |
| H  | 2.835555  | 2.777358  | 2.897530  |
| C  | -4.388991 | 1.356914  | 1.009484  |
| H  | -4.707423 | 2.112825  | 1.721412  |
| C  | 3.134858  | -1.759367 | -1.699407 |
| H  | 2.134442  | -1.526451 | -2.071491 |
| C  | -5.238976 | 0.298826  | 0.715293  |
| H  | -6.213956 | 0.234753  | 1.188231  |
| C  | -3.135028 | -1.759240 | -1.699463 |
| H  | -2.134676 | -1.526266 | -2.071684 |
| C  | 3.034211  | -3.064378 | -0.893449 |
| H  | 4.022817  | -3.484041 | -0.679632 |
| H  | 2.457542  | -3.824633 | -1.430886 |
| H  | 2.577739  | -2.874717 | 0.086878  |
| C  | -3.034193 | -3.064252 | -0.893532 |
| H  | -2.577544 | -2.874569 | 0.086706  |
| H  | -2.457583 | -3.824482 | -1.431068 |
| H  | -4.022750 | -3.483944 | -0.679543 |
| C  | -2.809614 | 3.973957  | 0.368922  |
| H  | -2.989791 | 4.012565  | -0.709934 |
| H  | -2.119560 | 4.785051  | 0.623358  |
| H  | -3.761198 | 4.174744  | 0.873478  |
| C  | -4.054213 | -1.949762 | -2.912418 |
| H  | -5.074750 | -2.202878 | -2.606050 |
| H  | -3.683703 | -2.762941 | -3.544722 |
| H  | -4.105537 | -1.044077 | -3.523768 |
| C  | 4.053877  | -1.949844 | -2.912494 |
| H  | 4.105006  | -1.044181 | -3.523891 |
| H  | 3.683358  | -2.763090 | -3.544707 |
| H  | 5.074488  | -2.202836 | -2.606265 |
| Ca | 0.000053  | -3.373923 | 0.741659  |
| H  | -0.000087 | -1.855600 | -1.092081 |
| H  | 0.000041  | -5.467409 | 0.466951  |
| C  | 0.000059  | -0.955548 | 1.588432  |
| C  | 1.215805  | -1.299145 | 2.318747  |
| C  | 1.198286  | -1.516024 | 3.692501  |
| C  | 0.000123  | -1.585236 | 4.412887  |
| C  | -1.198070 | -1.516065 | 3.692549  |
| C  | -1.215646 | -1.299191 | 2.318793  |
| H  | 0.000024  | 0.616622  | 1.285905  |
| H  | 2.184039  | -1.202181 | 1.825883  |
| H  | 2.143407  | -1.672076 | 4.209020  |
| H  | -2.143166 | -1.672148 | 4.209105  |
| H  | 0.000147  | -1.774967 | 5.480132  |
| H  | -2.183904 | -1.202255 | 1.825968  |



A5

|    |           |           |           |
|----|-----------|-----------|-----------|
| AI | 0.066854  | 0.121490  | -0.764123 |
| N  | 1.736828  | -1.038876 | -0.281295 |
| N  | -1.070939 | -1.348927 | -0.172798 |
| C  | 0.574528  | -3.119606 | -0.353497 |
| H  | 0.702735  | -4.194596 | -0.382939 |
| C  | 1.763325  | -2.349213 | -0.328849 |
| C  | 2.932016  | -0.295725 | -0.041121 |
| C  | -0.720586 | -2.651247 | -0.165654 |
| C  | -2.423566 | -1.040353 | 0.189956  |
| C  | 3.755239  | 0.120323  | -1.100950 |
| C  | 3.211881  | 0.083278  | 1.289870  |
| C  | 3.060566  | -3.125290 | -0.348376 |
| H  | 3.273651  | -3.418687 | -1.382372 |
| H  | 2.974408  | -4.039469 | 0.243327  |
| H  | 3.903785  | -2.537613 | 0.015803  |
| C  | -1.784232 | -3.698339 | 0.081430  |
| H  | -2.346975 | -3.480122 | 0.993364  |
| H  | -1.333953 | -4.686730 | 0.174721  |
| H  | -2.507038 | -3.722506 | -0.737728 |
| C  | 3.499461  | -0.292690 | -2.542187 |
| H  | 2.582258  | -0.886707 | -2.563118 |
| C  | -3.458195 | -1.119536 | -0.760072 |
| C  | -2.680700 | -0.616015 | 1.509022  |
| C  | 5.156360  | 1.296243  | 0.499380  |
| H  | 6.023623  | 1.914940  | 0.708605  |
| C  | 4.865999  | 0.917411  | -0.803088 |
| H  | 5.517364  | 1.242720  | -1.609773 |
| C  | 4.331456  | 0.875359  | 1.538376  |
| H  | 4.566841  | 1.171377  | 2.556131  |
| C  | -3.195912 | -1.492120 | -2.213005 |
| H  | -2.178495 | -1.887928 | -2.280411 |
| C  | 4.648645  | -1.154564 | -3.086468 |
| H  | 5.577337  | -0.577653 | -3.160464 |
| H  | 4.405630  | -1.524004 | -4.088346 |
| H  | 4.846249  | -2.016014 | -2.441895 |
| C  | -3.999461 | -0.355087 | 1.884782  |
| H  | -4.219755 | -0.043019 | 2.900906  |
| C  | -3.259939 | -0.253228 | -3.118170 |
| H  | -4.248381 | 0.217641  | -3.063223 |
| H  | -3.074070 | -0.535941 | -4.159681 |
| H  | -2.512688 | 0.486686  | -2.825087 |
| C  | 3.265827  | 0.924280  | -3.445708 |
| H  | 2.426300  | 1.519117  | -3.077177 |
| H  | 3.026861  | 0.600104  | -4.464027 |
| H  | 4.154204  | 1.564353  | -3.495219 |
| C  | -4.758257 | -0.815923 | -0.348591 |
| H  | -5.569926 | -0.863196 | -1.068632 |
| C  | 2.334190  | -0.405132 | 2.431791  |
| H  | 1.361614  | -0.653960 | 2.000238  |
| C  | -5.036511 | -0.457614 | 0.964218  |
| H  | -6.056732 | -0.241775 | 1.266202  |
| C  | -1.533959 | -0.392703 | 2.484118  |

|    |           |           |           |
|----|-----------|-----------|-----------|
| H  | -0.653378 | -0.149669 | 1.882365  |
| C  | 2.106873  | 0.649560  | 3.517794  |
| H  | 3.020654  | 0.871185  | 4.078772  |
| H  | 1.367350  | 0.289901  | 4.240775  |
| H  | 1.745073  | 1.597389  | 3.103009  |
| C  | -1.774381 | 0.794119  | 3.425123  |
| H  | -2.132379 | 1.677861  | 2.880351  |
| H  | -0.849474 | 1.058656  | 3.947149  |
| H  | -2.522818 | 0.572259  | 4.193073  |
| C  | -4.158282 | -2.572972 | -2.726770 |
| H  | -4.200599 | -3.439696 | -2.059655 |
| H  | -3.838491 | -2.918552 | -3.714796 |
| H  | -5.177989 | -2.186814 | -2.831265 |
| C  | -1.186016 | -1.659531 | 3.275474  |
| H  | -2.049915 | -2.007575 | 3.852770  |
| H  | -0.364989 | -1.461854 | 3.973411  |
| H  | -0.866815 | -2.465486 | 2.608765  |
| C  | 2.900681  | -1.691171 | 3.051334  |
| H  | 2.988581  | -2.486990 | 2.307304  |
| H  | 2.247200  | -2.051640 | 3.853364  |
| H  | 3.895750  | -1.512597 | 3.474363  |
| Ca | 0.016696  | 3.116509  | 0.968876  |
| H  | 0.735739  | 1.101690  | 0.482636  |
| H  | 0.471480  | 4.535919  | 2.450295  |
| C  | -1.297051 | 1.756669  | -0.995238 |
| C  | -0.690496 | 2.754861  | -1.798380 |
| C  | -1.085487 | 4.097894  | -1.797447 |
| C  | -2.141417 | 4.513970  | -0.980766 |
| C  | -2.819588 | 3.554774  | -0.225520 |
| C  | -2.406001 | 2.214871  | -0.245080 |
| H  | 0.537662  | 0.195851  | -2.302864 |
| H  | 0.146285  | 2.464383  | -2.434209 |
| H  | -0.568699 | 4.819335  | -2.424865 |
| H  | -3.664902 | 3.849387  | 0.390500  |
| H  | -2.440581 | 5.556469  | -0.949477 |
| H  | -2.965884 | 1.515324  | 0.367342  |

85

LAl(H)C<sub>6</sub>H<sub>5</sub>

|    |           |           |           |
|----|-----------|-----------|-----------|
| Al | -0.039172 | -0.799693 | 0.696919  |
| N  | -1.386633 | -0.800367 | -0.688345 |
| N  | 1.424314  | -0.949127 | -0.539086 |
| C  | 0.034889  | -2.062087 | -2.157876 |
| H  | 0.041550  | -2.701933 | -3.030935 |
| C  | -1.214055 | -1.517379 | -1.791623 |
| C  | -2.657426 | -0.197647 | -0.402761 |
| C  | 1.283456  | -1.719934 | -1.622858 |
| C  | 2.707637  | -0.377028 | -0.251772 |
| C  | -3.668549 | -0.957117 | 0.211171  |
| C  | -2.819948 | 1.177530  | -0.661621 |
| C  | -2.383157 | -1.783591 | -2.706266 |
| H  | -3.022147 | -2.556862 | -2.267947 |
| H  | -2.044047 | -2.128442 | -3.683450 |
| H  | -3.001156 | -0.891736 | -2.831664 |
| C  | -0.087757 | 0.876521  | 1.744953  |

|   |           |           |           |
|---|-----------|-----------|-----------|
| H | -0.190250 | -2.175185 | 1.500420  |
| C | -1.294321 | 1.271168  | 2.355196  |
| H | -2.185076 | 0.653268  | 2.253273  |
| C | -1.406445 | 2.452866  | 3.086237  |
| H | -2.358943 | 2.724188  | 3.533194  |
| C | 2.517000  | -2.246460 | -2.312671 |
| H | 3.193384  | -1.437759 | -2.597573 |
| H | 2.256733  | -2.822246 | -3.201005 |
| H | 3.071701  | -2.889690 | -1.621162 |
| C | -3.464911 | -2.409335 | 0.618610  |
| H | -2.520680 | -2.759153 | 0.191681  |
| C | 3.549311  | -0.979417 | 0.698686  |
| C | 3.067914  | 0.823687  | -0.894981 |
| C | -5.077145 | 1.017065  | 0.214136  |
| H | -6.025016 | 1.491634  | 0.448728  |
| C | 0.914993  | 2.916472  | 2.664419  |
| H | 1.789132  | 3.550972  | 2.783571  |
| C | 1.013042  | 1.730876  | 1.935325  |
| H | 1.979370  | 1.476438  | 1.506507  |
| C | -4.878706 | -0.324213 | 0.507390  |
| H | -5.673703 | -0.889704 | 0.984725  |
| C | -0.299209 | 3.284913  | 3.238394  |
| H | -0.380827 | 4.208567  | 3.804191  |
| C | -4.050221 | 1.759784  | -0.357916 |
| H | -4.206120 | 2.815710  | -0.549179 |
| C | 3.148105  | -2.248905 | 1.432504  |
| H | 2.245587  | -2.644941 | 0.957728  |
| C | -4.583015 | -3.326481 | 0.104172  |
| H | -5.538419 | -3.109834 | 0.593817  |
| H | -4.337578 | -4.372483 | 0.313323  |
| H | -4.734409 | -3.219108 | -0.974591 |
| C | 4.304060  | 1.392159  | -0.585739 |
| H | 4.605818  | 2.313838  | -1.075115 |
| C | 2.795879  | -1.936393 | 2.894228  |
| H | 3.673785  | -1.565392 | 3.435409  |
| H | 2.433779  | -2.836469 | 3.400919  |
| H | 2.013675  | -1.174070 | 2.964051  |
| C | -3.334443 | -2.521392 | 2.145035  |
| H | -2.502145 | -1.917291 | 2.516155  |
| H | -3.146892 | -3.560090 | 2.436047  |
| H | -4.252397 | -2.186505 | 2.641188  |
| C | 4.767788  | -0.361871 | 0.989942  |
| H | 5.427274  | -0.805466 | 1.730164  |
| C | -1.680346 | 2.009221  | -1.234082 |
| H | -0.749105 | 1.578660  | -0.853759 |
| C | 5.150365  | 0.809563  | 0.350245  |
| H | 6.103765  | 1.272611  | 0.585145  |
| C | 2.146920  | 1.518443  | -1.889042 |
| H | 1.192852  | 0.983992  | -1.894750 |
| C | -1.713696 | 3.465275  | -0.761296 |
| H | -2.559145 | 4.018015  | -1.185775 |
| H | -0.802579 | 3.978647  | -1.078689 |
| H | -1.768707 | 3.520045  | 0.330091  |
| C | 1.858503  | 2.965261  | -1.469699 |
| H | 1.409956  | 3.007128  | -0.473281 |

|   |           |           |           |
|---|-----------|-----------|-----------|
| H | 1.165502  | 3.428694  | -2.179329 |
| H | 2.770246  | 3.571978  | -1.459694 |
| C | 4.225161  | -3.337904 | 1.345863  |
| H | 4.499482  | -3.548053 | 0.306977  |
| H | 3.858353  | -4.265289 | 1.797003  |
| H | 5.137252  | -3.050393 | 1.879760  |
| C | 2.710006  | 1.475833  | -3.316723 |
| H | 3.669479  | 2.001457  | -3.378206 |
| H | 2.015575  | 1.959791  | -4.011546 |
| H | 2.866390  | 0.449812  | -3.661639 |
| C | -1.634633 | 1.928158  | -2.766307 |
| H | -1.475520 | 0.902962  | -3.112960 |
| H | -0.813237 | 2.539492  | -3.155543 |
| H | -2.569354 | 2.296821  | -3.203837 |

15

|    |           |           |           |
|----|-----------|-----------|-----------|
| B1 |           |           |           |
| Ca | -1.859518 | -0.000140 | -0.000127 |
| H  | -2.440648 | 2.044198  | 0.000126  |
| H  | -2.439774 | -2.044733 | 0.000028  |
| C  | 1.006293  | -0.699344 | 1.208975  |
| C  | 1.006094  | 0.698685  | 1.209431  |
| C  | 0.998634  | 1.399324  | 0.000526  |
| C  | 1.006398  | 0.699504  | -1.208866 |
| C  | 1.006603  | -0.698527 | -1.209322 |
| C  | 0.999067  | -1.399165 | -0.000406 |
| H  | 1.000687  | -1.244425 | 2.147296  |
| H  | 1.000247  | 1.243163  | 2.148104  |
| H  | 0.964330  | 2.482676  | 0.000891  |
| H  | 1.001222  | -1.243018 | -2.147988 |
| H  | 1.000778  | 1.244596  | -2.147181 |
| H  | 0.964988  | -2.482525 | -0.000766 |

15

|     |           |           |           |
|-----|-----------|-----------|-----------|
| B2* |           |           |           |
| Ca  | 1.633556  | -0.091422 | -0.000089 |
| H   | 3.558029  | 0.762661  | -0.000910 |
| H   | 0.726639  | -2.073148 | 0.000565  |
| C   | -0.983330 | -0.609248 | -1.214080 |
| C   | -0.845841 | 0.769063  | -1.206424 |
| C   | -0.684237 | 1.487424  | -0.000382 |
| C   | -0.845438 | 0.769881  | 1.206177  |
| C   | -0.982926 | -0.608456 | 1.214573  |
| C   | -0.849995 | -1.373607 | 0.000443  |
| H   | -1.113080 | -1.134844 | -2.154379 |
| H   | -0.884418 | 1.312003  | -2.147135 |
| H   | -0.612064 | 2.568421  | -0.000830 |
| H   | -1.112373 | -1.133520 | 2.155212  |
| H   | -0.883670 | 1.313379  | 2.146578  |
| H   | -1.199577 | -2.396842 | 0.000829  |

15

|    |          |           |           |
|----|----------|-----------|-----------|
| B3 |          |           |           |
| Ca | 1.609412 | -0.000192 | -0.323396 |
| H  | 3.676476 | -0.000352 | -0.704985 |

|   |           |           |           |
|---|-----------|-----------|-----------|
| H | -1.558812 | -0.001683 | -2.163613 |
| C | -0.893590 | 1.224317  | -0.502350 |
| C | -0.535842 | 1.215383  | 0.833368  |
| C | -0.391229 | 0.001222  | 1.562576  |
| C | -0.535701 | -1.214105 | 0.835264  |
| C | -0.893248 | -1.225167 | -0.500499 |
| C | -1.594757 | -0.000929 | -1.069503 |
| H | -0.958688 | 2.168985  | -1.036091 |
| H | -0.252410 | 2.152637  | 1.313129  |
| H | -0.149947 | 0.002051  | 2.618837  |
| H | -0.958151 | -2.170662 | -1.032811 |
| H | -0.252314 | -2.150516 | 1.316666  |
| H | -2.668190 | -0.000939 | -0.796351 |

88

|    |           |           |           |
|----|-----------|-----------|-----------|
| B4 |           |           |           |
| AI | 0.725232  | 0.283885  | -0.691572 |
| N  | 2.471879  | 0.204495  | 0.263349  |
| N  | 0.250656  | 1.865910  | 0.432770  |
| C  | 2.365495  | 2.259897  | 1.498818  |
| H  | 2.915776  | 2.929399  | 2.147647  |
| C  | 3.015113  | 1.081628  | 1.108508  |
| C  | 3.202952  | -0.995574 | -0.041020 |
| C  | 1.041116  | 2.609934  | 1.207672  |
| C  | -1.149004 | 2.189399  | 0.377028  |
| C  | 2.898843  | -2.177172 | 0.659492  |
| C  | 4.156786  | -0.985803 | -1.076996 |
| C  | 4.386758  | 0.819364  | 1.681489  |
| H  | 4.423486  | -0.163083 | 2.160182  |
| H  | 4.658137  | 1.582119  | 2.412005  |
| H  | 5.139090  | 0.809691  | 0.887356  |
| C  | 0.494062  | 3.861964  | 1.849415  |
| H  | -0.039221 | 4.473760  | 1.117356  |
| H  | 1.294770  | 4.452016  | 2.297167  |
| H  | -0.226870 | 3.604379  | 2.632128  |
| C  | 1.837675  | -2.227554 | 1.750266  |
| H  | 1.402781  | -1.228154 | 1.849155  |
| C  | -1.989418 | 1.717253  | 1.406546  |
| C  | -1.669351 | 2.881466  | -0.728716 |
| C  | 4.548726  | -3.347040 | -0.680932 |
| H  | 5.075972  | -4.263134 | -0.928530 |
| C  | 3.593615  | -3.342197 | 0.326187  |
| H  | 3.377852  | -4.263288 | 0.860511  |
| C  | 4.818547  | -2.176305 | -1.379160 |
| H  | 5.553692  | -2.191284 | -2.178462 |
| C  | -1.437304 | 0.913278  | 2.575428  |
| H  | -0.363607 | 1.108134  | 2.649969  |
| C  | 2.438423  | -2.596335 | 3.113347  |
| H  | 2.866580  | -3.604597 | 3.101670  |
| H  | 1.665052  | -2.570301 | 3.888219  |
| H  | 3.231800  | -1.899655 | 3.401943  |
| C  | -3.051266 | 3.081737  | -0.793503 |
| H  | -3.473479 | 3.609129  | -1.644470 |
| C  | -1.607785 | -0.587680 | 2.309547  |

|    |           |           |           |
|----|-----------|-----------|-----------|
| H  | -2.665617 | -0.856105 | 2.221283  |
| H  | -1.166932 | -1.175415 | 3.122830  |
| H  | -1.125703 | -0.886742 | 1.372462  |
| C  | 0.701534  | -3.186326 | 1.367914  |
| H  | 0.241828  | -2.884811 | 0.421351  |
| H  | -0.076966 | -3.184079 | 2.137565  |
| H  | 1.067455  | -4.213272 | 1.259796  |
| C  | -3.360555 | 1.944064  | 1.299551  |
| H  | -4.028239 | 1.568079  | 2.068109  |
| C  | 4.444217  | 0.266796  | -1.892460 |
| H  | 3.985778  | 1.117360  | -1.379532 |
| C  | -3.893122 | 2.617707  | 0.206423  |
| H  | -4.964950 | 2.774273  | 0.134137  |
| C  | -0.782533 | 3.417897  | -1.841559 |
| H  | 0.253784  | 3.168121  | -1.594401 |
| C  | 3.791352  | 0.164079  | -3.279128 |
| H  | 4.216951  | -0.671522 | -3.846081 |
| H  | 3.956999  | 1.083382  | -3.851207 |
| H  | 2.712567  | -0.001528 | -3.195248 |
| C  | -1.109152 | 2.754777  | -3.186379 |
| H  | -1.012472 | 1.667232  | -3.115385 |
| H  | -0.424670 | 3.110919  | -3.963624 |
| H  | -2.130841 | 2.989355  | -3.505579 |
| C  | -2.058744 | 1.305580  | 3.920894  |
| H  | -1.994594 | 2.384762  | 4.094553  |
| H  | -1.534422 | 0.796357  | 4.735833  |
| H  | -3.113039 | 1.016981  | 3.983609  |
| C  | -0.872269 | 4.947159  | -1.944591 |
| H  | -1.880000 | 5.268854  | -2.229071 |
| H  | -0.176642 | 5.318794  | -2.704086 |
| H  | -0.625929 | 5.428626  | -0.992878 |
| C  | 5.944856  | 0.561275  | -2.017754 |
| H  | 6.435222  | 0.592004  | -1.039443 |
| H  | 6.098242  | 1.528605  | -2.506684 |
| H  | 6.456907  | -0.194992 | -2.621936 |
| Ca | -4.768843 | -3.452115 | -1.874258 |
| H  | -5.762883 | -4.822368 | -3.126637 |
| H  | -2.928741 | -0.404681 | -2.196751 |
| C  | -2.462963 | -2.157544 | -1.007470 |
| C  | -2.893332 | -2.966034 | 0.024732  |
| C  | -4.139703 | -2.754982 | 0.686042  |
| C  | -4.959953 | -1.697234 | 0.198475  |
| C  | -4.559567 | -0.874873 | -0.837542 |
| C  | -3.078610 | -0.774983 | -1.177071 |
| H  | -1.517090 | -2.365763 | -1.500360 |
| H  | -2.310030 | -3.852441 | 0.276888  |
| H  | -4.446236 | -3.369064 | 1.524488  |
| H  | -5.231525 | -0.098420 | -1.194081 |
| H  | -5.976097 | -1.603731 | 0.583380  |
| H  | -2.575427 | -0.040666 | -0.525350 |

88

|     |           |           |           |
|-----|-----------|-----------|-----------|
| B5* |           |           |           |
| Al  | 0.042623  | 0.086992  | -0.441792 |
| N   | -1.335037 | -1.217588 | 0.141510  |

|   |           |           |           |
|---|-----------|-----------|-----------|
| N | 1.465446  | -1.079508 | 0.210071  |
| C | 0.142164  | -3.043092 | 0.637667  |
| H | 0.183572  | -4.086763 | 0.922372  |
| C | -1.135990 | -2.490759 | 0.465721  |
| C | -2.663188 | -0.680655 | 0.246918  |
| C | 1.357139  | -2.357057 | 0.592158  |
| C | 2.772886  | -0.483157 | 0.216226  |
| C | -3.009996 | -0.043254 | 1.457218  |
| C | -3.555135 | -0.742603 | -0.834676 |
| C | -2.302254 | -3.430114 | 0.667857  |
| H | -2.560201 | -3.877442 | -0.298117 |
| H | -3.190988 | -2.921627 | 1.042917  |
| H | -2.034538 | -4.238351 | 1.350366  |
| C | 2.585569  | -3.126229 | 1.022378  |
| H | 3.175476  | -3.431329 | 0.153815  |
| H | 2.298165  | -4.024158 | 1.570551  |
| H | 3.235503  | -2.515088 | 1.652183  |
| C | -2.037866 | -0.011430 | 2.631392  |
| H | -1.027966 | -0.086696 | 2.217779  |
| C | 3.092737  | 0.413231  | 1.255016  |
| C | 3.668707  | -0.749671 | -0.833801 |
| C | -5.161917 | 0.508810  | 0.486750  |
| H | -6.136976 | 0.977602  | 0.577459  |
| C | -4.271631 | 0.540331  | 1.556182  |
| H | -4.564016 | 1.037851  | 2.475574  |
| C | -4.803394 | -0.128814 | -0.692266 |
| H | -5.508741 | -0.157599 | -1.518231 |
| C | 2.086562  | 0.719845  | 2.360391  |
| H | 1.106166  | 0.827765  | 1.881523  |
| C | -2.243623 | -1.219969 | 3.557074  |
| H | -3.259493 | -1.223441 | 3.968189  |
| H | -1.536304 | -1.183536 | 4.392536  |
| H | -2.087749 | -2.165030 | 3.031288  |
| C | 4.900982  | -0.091685 | -0.826632 |
| H | 5.606678  | -0.268416 | -1.632992 |
| C | 2.356650  | 2.042801  | 3.080960  |
| H | 3.240015  | 1.983549  | 3.726976  |
| H | 1.502661  | 2.291449  | 3.719115  |
| H | 2.499693  | 2.864093  | 2.373179  |
| C | -2.091561 | 1.286671  | 3.443702  |
| H | -1.999478 | 2.168429  | 2.803542  |
| H | -1.264512 | 1.302917  | 4.161308  |
| H | -3.019735 | 1.375370  | 4.018715  |
| C | 4.343666  | 1.029687  | 1.226589  |
| H | 4.620922  | 1.724827  | 2.011497  |
| C | -3.229664 | -1.490576 | -2.120435 |
| H | -2.235643 | -1.933600 | -2.008348 |
| C | 5.241451  | 0.786344  | 0.192621  |
| H | 6.205564  | 1.285451  | 0.182068  |
| C | 3.341845  | -1.715385 | -1.969473 |
| H | 2.472266  | -2.309003 | -1.676576 |
| C | -3.176087 | -0.566290 | -3.343618 |
| H | -4.130822 | -0.049789 | -3.493511 |
| H | -2.965610 | -1.150042 | -4.245921 |
| H | -2.392571 | 0.185575  | -3.237219 |

|    |           |           |           |
|----|-----------|-----------|-----------|
| C  | 2.951391  | -0.987939 | -3.264424 |
| H  | 1.998643  | -0.466355 | -3.152240 |
| H  | 2.844396  | -1.709130 | -4.081813 |
| H  | 3.715605  | -0.257533 | -3.553095 |
| C  | 1.968679  | -0.416340 | 3.387466  |
| H  | 1.593896  | -1.338958 | 2.939155  |
| H  | 1.269520  | -0.131564 | 4.181630  |
| H  | 2.940117  | -0.624547 | 3.849895  |
| C  | 4.497056  | -2.691709 | -2.240473 |
| H  | 5.345743  | -2.189737 | -2.716903 |
| H  | 4.166649  | -3.484898 | -2.918654 |
| H  | 4.863889  | -3.156540 | -1.319767 |
| C  | -4.238319 | -2.624758 | -2.365588 |
| H  | -4.354056 | -3.265070 | -1.486521 |
| H  | -3.914102 | -3.247031 | -3.206191 |
| H  | -5.227929 | -2.225027 | -2.612504 |
| Ca | -0.658306 | 4.523607  | -1.500697 |
| H  | -0.945754 | 6.573695  | -1.957501 |
| H  | -0.187865 | 1.433973  | -3.341050 |
| C  | -1.247687 | 2.049235  | -1.511034 |
| C  | -0.880897 | 1.947793  | -0.002456 |
| C  | 0.268537  | 2.828943  | 0.337796  |
| C  | 1.316512  | 2.654326  | -0.530768 |
| C  | 1.160790  | 1.597266  | -1.525791 |
| C  | -0.169280 | 1.445080  | -2.249468 |
| H  | -2.257178 | 1.726342  | -1.761818 |
| H  | -1.747097 | 2.047391  | 0.649871  |
| H  | 0.347821  | 3.394195  | 1.265550  |
| H  | 2.038972  | 1.378239  | -2.126054 |
| H  | 2.294583  | 3.106216  | -0.372557 |
| H  | -0.327033 | -0.043212 | -2.172364 |

88

|    |           |           |           |
|----|-----------|-----------|-----------|
| B6 |           |           |           |
| Al | -0.046050 | -0.359991 | -1.011585 |
| N  | -1.490994 | -1.251718 | -0.099384 |
| N  | 1.329871  | -1.380548 | -0.131822 |
| C  | -0.159285 | -3.254896 | 0.064116  |
| H  | -0.205055 | -4.327986 | 0.195253  |
| C  | -1.386019 | -2.571523 | 0.082770  |
| C  | -2.768552 | -0.635548 | 0.130746  |
| C  | 1.121018  | -2.675306 | 0.094458  |
| C  | 2.631640  | -0.820012 | 0.094393  |
| C  | -3.034491 | -0.090984 | 1.404236  |
| C  | -3.704769 | -0.560048 | -0.913421 |
| C  | -2.629100 | -3.386293 | 0.341978  |
| H  | -3.202212 | -2.976510 | 1.177572  |
| H  | -2.376832 | -4.424373 | 0.558447  |
| H  | -3.282782 | -3.356502 | -0.535226 |
| C  | 2.290079  | -3.564993 | 0.427986  |
| H  | 3.051803  | -3.504758 | -0.354565 |
| H  | 1.973828  | -4.601880 | 0.541745  |
| H  | 2.765275  | -3.237495 | 1.356845  |
| C  | -1.952773 | -0.035773 | 2.478181  |
| H  | -1.013935 | 0.181990  | 1.956475  |



|    |           |           |           |
|----|-----------|-----------|-----------|
| C  | 2.935106  | -0.310644 | 1.368728  |
| C  | 3.540226  | -0.721442 | -0.974394 |
| C  | -5.252899 | 0.505929  | 0.616020  |
| H  | -6.226987 | 0.943704  | 0.811057  |
| C  | -4.297401 | 0.458782  | 1.626248  |
| H  | -4.538349 | 0.880160  | 2.595648  |
| C  | -4.948199 | 0.019481  | -0.646174 |
| H  | -5.686349 | 0.091947  | -1.439208 |
| C  | 1.965526  | -0.419302 | 2.535620  |
| H  | 1.078169  | -0.958572 | 2.190963  |
| C  | -1.769385 | -1.361948 | 3.230377  |
| H  | -2.704693 | -1.670013 | 3.711584  |
| H  | -1.010680 | -1.242348 | 4.011913  |
| H  | -1.434746 | -2.168858 | 2.574931  |
| C  | 4.756231  | -0.074235 | -0.746489 |
| H  | 5.468455  | 0.026169  | -1.560526 |
| C  | 1.505686  | 0.963919  | 3.010698  |
| H  | 2.354507  | 1.577100  | 3.332038  |
| H  | 0.829968  | 0.858892  | 3.865489  |
| H  | 0.983826  | 1.507880  | 2.219502  |
| C  | -2.179417 | 1.098058  | 3.482337  |
| H  | -2.351352 | 2.052114  | 2.976999  |
| H  | -1.297769 | 1.211615  | 4.118050  |
| H  | -3.029840 | 0.894781  | 4.142764  |
| C  | 4.165694  | 0.321180  | 1.549371  |
| H  | 4.417199  | 0.731070  | 2.523516  |
| C  | -3.376244 | -1.030986 | -2.321905 |
| H  | -2.465469 | -1.635012 | -2.280187 |
| C  | 5.068898  | 0.449073  | 0.501841  |
| H  | 6.017610  | 0.953042  | 0.658794  |
| C  | 3.223495  | -1.267457 | -2.359518 |
| H  | 2.290949  | -1.835781 | -2.298563 |
| C  | -3.074934 | 0.178791  | -3.219331 |
| H  | -3.959883 | 0.816599  | -3.323020 |
| H  | -2.763675 | -0.148405 | -4.216127 |
| H  | -2.267215 | 0.789668  | -2.803570 |
| C  | 2.992805  | -0.129599 | -3.364146 |
| H  | 2.164063  | 0.513951  | -3.055078 |
| H  | 2.743493  | -0.536181 | -4.349251 |
| H  | 3.888874  | 0.492993  | -3.465766 |
| C  | 2.568110  | -1.220028 | 3.698786  |
| H  | 2.907502  | -2.210021 | 3.378583  |
| H  | 1.822178  | -1.357195 | 4.488690  |
| H  | 3.426414  | -0.700344 | 4.138324  |
| C  | 4.314838  | -2.221872 | -2.863699 |
| H  | 5.259545  | -1.697402 | -3.042337 |
| H  | 4.007344  | -2.679113 | -3.809437 |
| H  | 4.511896  | -3.023864 | -2.145164 |
| C  | -4.478717 | -1.902350 | -2.936469 |
| H  | -4.741394 | -2.741159 | -2.283899 |
| H  | -4.142051 | -2.308938 | -3.895095 |
| H  | -5.392708 | -1.330184 | -3.127216 |
| Ca | -0.005236 | 4.293290  | -1.605684 |
| H  | -0.429127 | 5.419115  | -3.336728 |
| H  | -0.237656 | 1.854600  | -1.941252 |

|   |           |           |           |
|---|-----------|-----------|-----------|
| C | -0.955728 | 2.323807  | 0.082876  |
| C | -0.630216 | 3.379887  | 0.889121  |
| C | 0.661766  | 4.018510  | 0.892356  |
| C | 1.700180  | 3.251676  | 0.249157  |
| C | 1.458277  | 2.196367  | -0.584758 |
| C | 0.047083  | 1.650526  | -0.865103 |
| H | -1.953408 | 1.904048  | 0.159935  |
| H | -1.404052 | 3.774666  | 1.546183  |
| H | 0.916251  | 4.715208  | 1.681769  |
| H | 2.314090  | 1.665987  | -0.988781 |
| H | 2.738567  | 3.530700  | 0.420726  |
| H | -0.073525 | -0.839656 | -2.542022 |

88

B7\*

|    |           |           |           |
|----|-----------|-----------|-----------|
| Al | 0.290460  | -0.496836 | -0.866923 |
| N  | -0.941229 | -1.337014 | 0.394469  |
| N  | 1.841114  | -0.921445 | 0.227070  |
| C  | 0.762789  | -2.869866 | 1.123133  |
| H  | 0.936444  | -3.831830 | 1.589199  |
| C  | -0.575405 | -2.486752 | 0.971165  |
| C  | -2.291321 | -0.869919 | 0.480709  |
| C  | 1.902970  | -2.076290 | 0.877536  |
| C  | 3.009899  | -0.093054 | 0.122210  |
| C  | -2.633185 | 0.011066  | 1.529335  |
| C  | -3.228679 | -1.209053 | -0.520801 |
| C  | -1.624246 | -3.460860 | 1.453682  |
| H  | -1.259995 | -4.047863 | 2.298376  |
| H  | -1.850636 | -4.152736 | 0.634705  |
| H  | -2.555641 | -2.967221 | 1.733938  |
| C  | 3.229787  | -2.596029 | 1.372577  |
| H  | 3.798722  | -2.997772 | 0.527648  |
| H  | 3.090553  | -3.391517 | 2.105307  |
| H  | 3.833401  | -1.799662 | 1.813099  |
| C  | -1.665413 | 0.294140  | 2.670585  |
| H  | -0.653816 | 0.222567  | 2.261102  |
| C  | 3.154263  | 0.969730  | 1.035200  |
| C  | 3.948375  | -0.315271 | -0.899475 |
| C  | -4.829806 | 0.294188  | 0.522710  |
| H  | -5.807657 | 0.764291  | 0.519219  |
| C  | -3.910537 | 0.587115  | 1.524176  |
| H  | -4.190507 | 1.276707  | 2.313443  |
| C  | -4.491901 | -0.611228 | -0.480898 |
| H  | -5.217372 | -0.833501 | -1.256938 |
| C  | 2.088568  | 1.237050  | 2.085581  |
| H  | 1.149312  | 0.875050  | 1.662065  |
| C  | -1.778665 | -0.772768 | 3.771892  |
| H  | -2.800362 | -0.816445 | 4.165453  |
| H  | -1.104416 | -0.528285 | 4.599131  |
| H  | -1.508886 | -1.766060 | 3.409792  |
| C  | 5.068711  | 0.518205  | -0.955540 |
| H  | 5.806804  | 0.366724  | -1.737777 |
| C  | 1.905937  | 2.726392  | 2.389708  |
| H  | 2.751861  | 3.136822  | 2.952010  |
| H  | 1.009979  | 2.871385  | 3.002375  |

|    |           |           |           |
|----|-----------|-----------|-----------|
| H  | 1.781519  | 3.304031  | 1.469820  |
| C  | -1.835626 | 1.683206  | 3.296255  |
| H  | -1.872974 | 2.476483  | 2.544381  |
| H  | -0.993385 | 1.888281  | 3.964155  |
| H  | -2.746536 | 1.745113  | 3.901640  |
| C  | 4.293805  | 1.767948  | 0.945793  |
| H  | 4.430594  | 2.588936  | 1.641956  |
| C  | -2.919354 | -2.218510 | -1.617959 |
| H  | -1.897581 | -2.578206 | -1.468659 |
| C  | 5.251607  | 1.541324  | -0.036340 |
| H  | 6.130859  | 2.175344  | -0.094891 |
| C  | 3.755601  | -1.388861 | -1.959906 |
| H  | 2.910804  | -2.017475 | -1.663535 |
| C  | -2.979023 | -1.596927 | -3.020079 |
| H  | -3.955600 | -1.143046 | -3.223643 |
| H  | -2.802403 | -2.365048 | -3.779259 |
| H  | -2.200932 | -0.836108 | -3.136490 |
| C  | 3.386635  | -0.746773 | -3.305171 |
| H  | 2.485663  | -0.134527 | -3.212661 |
| H  | 3.191792  | -1.518711 | -4.056698 |
| H  | 4.199270  | -0.108143 | -3.669202 |
| C  | 2.331533  | 0.443513  | 3.376700  |
| H  | 2.322684  | -0.635167 | 3.197528  |
| H  | 1.546844  | 0.663927  | 4.109598  |
| H  | 3.296882  | 0.709288  | 3.821865  |
| C  | 4.984569  | -2.295391 | -2.112193 |
| H  | 5.838905  | -1.750461 | -2.527548 |
| H  | 4.760121  | -3.121467 | -2.794387 |
| H  | 5.298853  | -2.718943 | -1.152985 |
| C  | -3.871002 | -3.421585 | -1.522568 |
| H  | -3.884444 | -3.849383 | -0.515606 |
| H  | -3.562179 | -4.202579 | -2.224413 |
| H  | -4.897496 | -3.135360 | -1.775090 |
| Ca | -2.928544 | 1.885921  | -1.597238 |
| H  | -4.750423 | 2.103345  | -2.660366 |
| H  | -1.252026 | 0.454923  | -1.526063 |
| C  | -0.592234 | 2.273398  | -0.056399 |
| C  | -1.115530 | 3.537958  | -0.297453 |
| C  | -1.189059 | 4.063830  | -1.600625 |
| C  | -0.454435 | 3.364255  | -2.605951 |
| C  | 0.114253  | 2.135333  | -2.372717 |
| C  | -0.140044 | 1.392309  | -1.133918 |
| H  | -0.501948 | 1.945454  | 0.969925  |
| H  | -1.458729 | 4.139205  | 0.543870  |
| H  | -1.563419 | 5.064235  | -1.782743 |
| H  | 0.702370  | 1.668573  | -3.159055 |
| H  | -0.301725 | 3.844337  | -3.569725 |
| H  | 0.429526  | -1.358786 | -2.205588 |

88

|    |           |           |           |
|----|-----------|-----------|-----------|
| B8 |           |           |           |
| Al | 0.015793  | 0.313893  | -0.613959 |
| N  | -1.377040 | -0.959986 | -0.863810 |
| N  | 1.446962  | -0.946876 | -0.708851 |
| C  | 0.089623  | -2.602696 | -1.822092 |

|   |           |           |           |
|---|-----------|-----------|-----------|
| H | 0.126621  | -3.533597 | -2.372486 |
| C | -1.184464 | -2.112136 | -1.510648 |
| C | -2.670237 | -0.661981 | -0.308563 |
| C | 1.319387  | -2.107176 | -1.356619 |
| C | 2.734969  | -0.581589 | -0.173251 |
| C | -2.935590 | -1.090170 | 1.007319  |
| C | -3.597142 | 0.098418  | -1.040402 |
| C | -2.375547 | -2.935189 | -1.925511 |
| H | -3.104397 | -3.025811 | -1.117802 |
| H | -2.072326 | -3.930305 | -2.250755 |
| H | -2.882913 | -2.435127 | -2.756717 |
| C | 2.536458  | -2.958775 | -1.612110 |
| H | 3.097789  | -2.545802 | -2.455001 |
| H | 2.248069  | -3.980691 | -1.858767 |
| H | 3.208710  | -2.970493 | -0.752175 |
| C | -1.941724 | -1.927566 | 1.800832  |
| H | -1.001742 | -1.957176 | 1.243047  |
| C | 2.983540  | -0.826647 | 1.194304  |
| C | 3.687974  | 0.037310  | -1.000619 |
| C | -5.085258 | 0.024253  | 0.875449  |
| H | -6.027273 | 0.298476  | 1.339840  |
| C | -4.159363 | -0.739817 | 1.576859  |
| H | -4.390783 | -1.060838 | 2.588189  |
| C | -4.802490 | 0.437073  | -0.419392 |
| H | -5.528370 | 1.037706  | -0.959242 |
| C | 1.911041  | -1.420165 | 2.102950  |
| H | 0.952256  | -0.997457 | 1.784893  |
| C | -2.429144 | -3.377086 | 1.942119  |
| H | -3.371719 | -3.421921 | 2.498684  |
| H | -1.688277 | -3.976318 | 2.481781  |
| H | -2.592477 | -3.844265 | 0.966528  |
| C | 4.920541  | 0.380062  | -0.437550 |
| H | 5.667536  | 0.871917  | -1.052894 |
| C | 2.092594  | -1.032322 | 3.573653  |
| H | 2.959846  | -1.527666 | 4.023445  |
| H | 1.213623  | -1.337765 | 4.147226  |
| H | 2.209727  | 0.048642  | 3.692681  |
| C | -1.635023 | -1.323297 | 3.175861  |
| H | -1.232759 | -0.310372 | 3.085158  |
| H | -0.896128 | -1.942924 | 3.694049  |
| H | -2.526681 | -1.281240 | 3.809789  |
| C | 4.236285  | -0.480396 | 1.700404  |
| H | 4.462505  | -0.656994 | 2.745805  |
| C | -3.326772 | 0.564381  | -2.462081 |
| H | -2.350604 | 0.172913  | -2.765678 |
| C | 5.200770  | 0.114014  | 0.893128  |
| H | 6.164776  | 0.385846  | 1.311335  |
| C | 3.422959  | 0.370493  | -2.461749 |
| H | 2.444440  | -0.036658 | -2.734299 |
| C | -3.261315 | 2.094119  | -2.544146 |
| H | -4.234071 | 2.546599  | -2.323462 |
| H | -2.966939 | 2.411614  | -3.549449 |
| H | -2.549421 | 2.527627  | -1.836513 |
| C | 3.368363  | 1.889745  | -2.672601 |
| H | 2.684275  | 2.385588  | -1.979130 |

|    |           |           |           |
|----|-----------|-----------|-----------|
| H  | 3.055494  | 2.119649  | -3.696524 |
| H  | 4.351862  | 2.344233  | -2.511290 |
| C  | 1.802221  | -2.946099 | 1.970857  |
| H  | 1.513581  | -3.253423 | 0.962785  |
| H  | 1.040538  | -3.328008 | 2.659725  |
| H  | 2.755280  | -3.426558 | 2.218310  |
| C  | 4.471329  | -0.250922 | -3.397925 |
| H  | 5.453546  | 0.210344  | -3.251567 |
| H  | 4.185121  | -0.087175 | -4.441570 |
| H  | 4.589366  | -1.327196 | -3.240083 |
| C  | -4.376894 | 0.020275  | -3.442653 |
| H  | -4.472815 | -1.068298 | -3.381507 |
| H  | -4.106013 | 0.284370  | -4.469698 |
| H  | -5.364150 | 0.449244  | -3.240928 |
| Ca | 0.119472  | 3.882925  | -0.512081 |
| H  | -1.782351 | 4.743759  | -0.962110 |
| H  | 2.201220  | 4.350888  | -0.601660 |
| C  | -1.388921 | 1.966606  | 1.417863  |
| C  | -1.502345 | 2.912169  | 2.438600  |
| C  | -0.363446 | 3.354748  | 3.109882  |
| C  | 0.885024  | 2.850975  | 2.747668  |
| C  | 0.987774  | 1.906868  | 1.724218  |
| C  | -0.143279 | 1.422543  | 1.032146  |
| H  | -2.299996 | 1.667182  | 0.906678  |
| H  | -2.477646 | 3.316393  | 2.689210  |
| H  | -0.446084 | 4.100343  | 3.894419  |
| H  | 1.982170  | 1.565531  | 1.449482  |
| H  | 1.783541  | 3.208754  | 3.240435  |
| H  | 0.098454  | 1.405233  | -1.817683 |

88

|     |           |           |           |
|-----|-----------|-----------|-----------|
| B9* |           |           |           |
| Al  | 0.074329  | 0.462932  | 0.424493  |
| N   | -1.173466 | -0.932985 | 1.007455  |
| N   | 1.615492  | -0.634753 | 0.942255  |
| C   | 0.392581  | -2.037247 | 2.460843  |
| H   | 0.490282  | -2.756835 | 3.263441  |
| C   | -0.903843 | -1.812977 | 1.971443  |
| C   | -2.495398 | -0.905208 | 0.448390  |
| C   | 1.587550  | -1.565515 | 1.891715  |
| C   | 2.850952  | -0.355567 | 0.267914  |
| C   | -3.490731 | -0.092500 | 1.019957  |
| C   | -2.751948 | -1.670848 | -0.709861 |
| C   | -2.021416 | -2.633363 | 2.569137  |
| H   | -2.711449 | -1.984592 | 3.114802  |
| H   | -1.629661 | -3.383635 | 3.256290  |
| H   | -2.606051 | -3.132071 | 1.792106  |
| C   | 2.871251  | -2.208567 | 2.354447  |
| H   | 2.733212  | -2.687466 | 3.324873  |
| H   | 3.687529  | -1.486912 | 2.417003  |
| H   | 3.177116  | -2.976607 | 1.637110  |
| C   | -3.207064 | 0.860688  | 2.171707  |
| H   | -2.158415 | 0.741159  | 2.459032  |
| C   | 3.635747  | 0.744058  | 0.663611  |
| C   | 3.230443  | -1.168616 | -0.817664 |

|    |           |           |           |
|----|-----------|-----------|-----------|
| C  | -5.062670 | -0.925558 | -0.627181 |
| H  | -6.066404 | -0.946013 | -1.039991 |
| C  | -4.773362 | -0.123577 | 0.465925  |
| H  | -5.555641 | 0.495396  | 0.896305  |
| C  | -4.052683 | -1.679842 | -1.215040 |
| H  | -4.283796 | -2.267643 | -2.096289 |
| C  | 3.230256  | 1.662982  | 1.805962  |
| H  | 2.219807  | 1.384527  | 2.118004  |
| C  | -4.072221 | 0.585712  | 3.409119  |
| H  | -5.136207 | 0.724337  | 3.189575  |
| H  | -3.806801 | 1.276348  | 4.215865  |
| H  | -3.942442 | -0.433770 | 3.782506  |
| C  | 4.427571  | -0.881964 | -1.475114 |
| H  | 4.737525  | -1.499383 | -2.313645 |
| C  | 3.181506  | 3.128040  | 1.349821  |
| H  | 4.184521  | 3.538680  | 1.191807  |
| H  | 2.679183  | 3.754352  | 2.093780  |
| H  | 2.648845  | 3.218925  | 0.395601  |
| C  | -3.399881 | 2.314421  | 1.709734  |
| H  | -2.922373 | 2.468107  | 0.735592  |
| H  | -2.982256 | 3.018444  | 2.437315  |
| H  | -4.461211 | 2.554014  | 1.581487  |
| C  | 4.827460  | 0.988076  | -0.022883 |
| H  | 5.451745  | 1.825514  | 0.275624  |
| C  | -1.635849 | -2.426169 | -1.426033 |
| H  | -0.737714 | -1.804215 | -1.340764 |
| C  | 5.228380  | 0.182229  | -1.079952 |
| H  | 6.158634  | 0.387630  | -1.600403 |
| C  | 2.363804  | -2.319837 | -1.307070 |
| H  | 1.513351  | -2.420859 | -0.626327 |
| C  | -1.921440 | -2.617593 | -2.920316 |
| H  | -2.703057 | -3.365963 | -3.092611 |
| H  | -1.020940 | -2.973910 | -3.428021 |
| H  | -2.233183 | -1.684458 | -3.399479 |
| C  | 1.800445  | -2.011372 | -2.700064 |
| H  | 1.218513  | -1.085889 | -2.687276 |
| H  | 1.150484  | -2.825528 | -3.036306 |
| H  | 2.603943  | -1.898000 | -3.435847 |
| C  | 4.151732  | 1.508154  | 3.023837  |
| H  | 4.134491  | 0.485921  | 3.413080  |
| H  | 3.834500  | 2.179756  | 3.828100  |
| H  | 5.188481  | 1.753484  | 2.768416  |
| C  | 3.115040  | -3.657912 | -1.315870 |
| H  | 3.927688  | -3.656733 | -2.050208 |
| H  | 2.431906  | -4.471993 | -1.579506 |
| H  | 3.552643  | -3.885327 | -0.339402 |
| C  | -1.310268 | -3.783865 | -0.786364 |
| H  | -0.921299 | -3.678983 | 0.228798  |
| H  | -0.544333 | -4.298927 | -1.377162 |
| H  | -2.199438 | -4.423886 | -0.754680 |
| Ca | -0.333700 | 3.551180  | 0.067567  |
| H  | -0.240420 | 5.388623  | 1.136700  |
| H  | -0.135092 | 0.340570  | -1.350142 |
| C  | 0.283511  | 1.958495  | -2.966288 |
| C  | 0.033372  | 3.315430  | -2.919357 |

|   |           |          |           |
|---|-----------|----------|-----------|
| C | -1.214174 | 3.839594 | -2.498338 |
| C | -2.215550 | 2.902026 | -2.161292 |
| C | -1.989862 | 1.537610 | -2.181382 |
| C | -0.693601 | 0.981205 | -2.524189 |
| H | 1.243081  | 1.606412 | -3.334144 |
| H | 0.803999  | 3.998705 | -3.271280 |
| H | -1.438330 | 4.897453 | -2.586972 |
| H | -2.806566 | 0.861537 | -1.945692 |
| H | -3.215471 | 3.256267 | -1.916769 |
| H | -0.697217 | 0.022146 | -3.043822 |

88

|    |           |           |           |
|----|-----------|-----------|-----------|
| C1 |           |           |           |
| Al | 0.467331  | -0.070799 | -0.519125 |
| N  | -0.087408 | -1.893953 | 0.082422  |
| N  | 2.322552  | -0.513458 | 0.054633  |
| C  | 2.067693  | -2.850242 | 0.537433  |
| H  | 2.591888  | -3.757558 | 0.809128  |
| C  | 0.678464  | -2.941273 | 0.400061  |
| C  | -1.513388 | -2.040027 | 0.176552  |
| C  | 2.835410  | -1.680633 | 0.442504  |
| C  | 3.181843  | 0.639428  | 0.028444  |
| C  | -2.125741 | -1.876308 | 1.436326  |
| C  | -2.277278 | -2.275694 | -0.979587 |
| C  | 0.036616  | -4.280778 | 0.668775  |
| H  | -0.547958 | -4.246977 | 1.593769  |
| H  | 0.790768  | -5.062704 | 0.764447  |
| H  | -0.656409 | -4.546956 | -0.133670 |
| C  | -2.318077 | 2.566724  | 0.776304  |
| H  | -2.190416 | 2.720527  | 1.841960  |
| C  | -3.073253 | 1.487840  | 0.310254  |
| H  | -3.509284 | 0.783307  | 1.010252  |
| C  | -3.262092 | 1.306526  | -1.061063 |
| H  | -3.844778 | 0.463869  | -1.417177 |
| C  | 4.299188  | -1.775972 | 0.796915  |
| H  | 4.919689  | -1.566044 | -0.079347 |
| H  | 4.547780  | -2.769006 | 1.172470  |
| H  | 4.562247  | -1.031323 | 1.553186  |
| C  | -1.302868 | -1.613203 | 2.691133  |
| H  | -0.271207 | -1.914746 | 2.490182  |
| C  | 3.172174  | 1.522885  | 1.123160  |
| C  | 3.959033  | 0.902131  | -1.115958 |
| C  | -4.289660 | -2.142671 | 0.372126  |
| H  | -5.372081 | -2.179902 | 0.447424  |
| C  | -1.926254 | 3.271479  | -1.504837 |
| H  | -1.474900 | 3.959794  | -2.211619 |
| C  | -1.738871 | 3.454443  | -0.132154 |
| H  | -1.143923 | 4.286388  | 0.230353  |
| C  | -3.517560 | -1.931220 | 1.509879  |
| H  | -4.010111 | -1.803320 | 2.469206  |
| C  | -2.694366 | 2.202357  | -1.969444 |
| H  | -2.857995 | 2.072247  | -3.033111 |
| C  | -3.668931 | -2.318925 | -0.856892 |
| H  | -4.276831 | -2.497264 | -1.739812 |
| C  | 2.304983  | 1.288053  | 2.352601  |

|    |           |           |           |
|----|-----------|-----------|-----------|
| H  | 1.743515  | 0.360750  | 2.201203  |
| C  | -1.781960 | -2.424408 | 3.900738  |
| H  | -2.762569 | -2.091148 | 4.255921  |
| H  | -1.078979 | -2.306173 | 4.731205  |
| H  | -1.855521 | -3.490769 | 3.664717  |
| C  | 4.745958  | 2.054177  | -1.131161 |
| H  | 5.349027  | 2.278171  | -2.006104 |
| C  | 1.283686  | 2.420795  | 2.527616  |
| H  | 1.780106  | 3.382890  | 2.693130  |
| H  | 0.637392  | 2.225321  | 3.389570  |
| H  | 0.653276  | 2.512254  | 1.636861  |
| C  | -1.270697 | -0.113927 | 3.014134  |
| H  | -0.880803 | 0.462869  | 2.168995  |
| H  | -0.632621 | 0.079245  | 3.883199  |
| H  | -2.276295 | 0.258811  | 3.241805  |
| C  | 3.982556  | 2.659043  | 1.064378  |
| H  | 3.994913  | 3.349957  | 1.902743  |
| C  | -1.637268 | -2.500625 | -2.341251 |
| H  | -0.551589 | -2.489082 | -2.205419 |
| C  | 4.767261  | 2.925711  | -0.049062 |
| H  | 5.388559  | 3.815396  | -0.078023 |
| C  | 3.923898  | -0.006280 | -2.336657 |
| H  | 3.422279  | -0.936120 | -2.052933 |
| C  | -1.990720 | -1.373883 | -3.321268 |
| H  | -3.071838 | -1.325920 | -3.496317 |
| H  | -1.502900 | -1.541341 | -4.287103 |
| H  | -1.659390 | -0.405992 | -2.933614 |
| C  | 3.093340  | 0.636349  | -3.457814 |
| H  | 2.077731  | 0.861075  | -3.116295 |
| H  | 3.027698  | -0.034690 | -4.320976 |
| H  | 3.551940  | 1.574528  | -3.789768 |
| C  | 3.150071  | 1.103217  | 3.620069  |
| H  | 3.862764  | 0.280196  | 3.507691  |
| H  | 2.506225  | 0.880465  | 4.477375  |
| H  | 3.719354  | 2.008587  | 3.856420  |
| C  | 5.324870  | -0.377300 | -2.840476 |
| H  | 5.850366  | 0.490224  | -3.253038 |
| H  | 5.251611  | -1.123751 | -3.637718 |
| H  | 5.946549  | -0.792325 | -2.040668 |
| C  | -2.012888 | -3.871595 | -2.921523 |
| H  | -1.768776 | -4.682537 | -2.228143 |
| H  | -1.470925 | -4.048142 | -3.856054 |
| H  | -3.083778 | -3.933905 | -3.142435 |
| Ca | -4.837588 | 3.919376  | -0.436839 |
| H  | -5.068207 | 4.604328  | 1.569220  |
| H  | -5.756179 | 3.974056  | -2.358587 |

88

|     |           |           |           |
|-----|-----------|-----------|-----------|
| C2* |           |           |           |
| Al  | 0.000019  | -0.346503 | -0.720222 |
| N   | -1.388950 | -1.379115 | 0.181300  |
| N   | 1.389026  | -1.379068 | 0.181300  |
| C   | 0.000071  | -3.239962 | 0.786715  |
| H   | 0.000091  | -4.267116 | 1.129389  |
| C   | -1.252377 | -2.625912 | 0.636321  |



|   |           |           |           |
|---|-----------|-----------|-----------|
| C | -2.669605 | -0.725325 | 0.216368  |
| C | 1.252499  | -2.625861 | 0.636336  |
| C | 2.669651  | -0.725218 | 0.216323  |
| C | -2.970355 | 0.085516  | 1.331659  |
| C | -3.541228 | -0.817490 | -0.881442 |
| C | -2.477272 | -3.442437 | 0.965274  |
| H | -3.256900 | -2.840475 | 1.435048  |
| H | -2.227975 | -4.282829 | 1.614234  |
| H | -2.895464 | -3.839959 | 0.033739  |
| C | -0.000081 | 1.938716  | -0.002598 |
| H | -0.000103 | 1.882126  | 1.083569  |
| C | -1.223915 | 2.359008  | -0.639186 |
| H | -2.149913 | 2.402858  | -0.073873 |
| C | -1.217658 | 2.442234  | -2.012675 |
| H | -2.136170 | 2.612398  | -2.565728 |
| C | 2.477413  | -3.442352 | 0.965311  |
| H | 2.895451  | -3.840110 | 0.033806  |
| H | 2.228171  | -4.282588 | 1.614494  |
| H | 3.257129  | -2.840317 | 1.434843  |
| C | -2.008164 | 0.209294  | 2.505735  |
| H | -1.004316 | 0.010551  | 2.119425  |
| C | 2.970403  | 0.085651  | 1.331593  |
| C | 3.541233  | -0.817349 | -0.881523 |
| C | -5.057113 | 0.697450  | 0.256776  |
| H | -5.989052 | 1.253841  | 0.271891  |
| C | 1.217511  | 2.442345  | -2.012639 |
| H | 2.136024  | 2.612590  | -2.565665 |
| C | 1.223735  | 2.359124  | -0.639150 |
| H | 2.149718  | 2.403059  | -0.073813 |
| C | -4.180794 | 0.778395  | 1.333716  |
| H | -4.437086 | 1.407090  | 2.179973  |
| C | -0.000053 | 2.230322  | -2.707842 |
| H | -0.000036 | 2.222955  | -3.792045 |
| C | -4.733130 | -0.088793 | -0.839499 |
| H | -5.418202 | -0.138195 | -1.680968 |
| C | 2.008278  | 0.209358  | 2.505728  |
| H | 1.004420  | 0.010478  | 2.119508  |
| C | -2.287579 | -0.853369 | 3.579398  |
| H | -3.309774 | -0.756067 | 3.961696  |
| H | -1.596570 | -0.731713 | 4.420026  |
| H | -2.163601 | -1.867823 | 3.192075  |
| C | 4.733093  | -0.088578 | -0.839643 |
| H | 5.418131  | -0.137954 | -1.681140 |
| C | 1.992532  | 1.606093  | 3.136945  |
| H | 2.921129  | 1.819881  | 3.676474  |
| H | 1.179161  | 1.672403  | 3.865332  |
| H | 1.837704  | 2.401611  | 2.401965  |
| C | -1.992542 | 1.606011  | 3.136995  |
| H | -1.837949 | 2.401578  | 2.402017  |
| H | -1.179075 | 1.672421  | 3.865266  |
| H | -2.921095 | 1.819638  | 3.676665  |
| C | 4.180801  | 0.778601  | 1.333587  |
| H | 4.437100  | 1.407317  | 2.179826  |
| C | -3.224982 | -1.663884 | -2.105285 |
| H | -2.307840 | -2.225484 | -1.901332 |

|    |           |           |           |
|----|-----------|-----------|-----------|
| C  | 5.057075  | 0.697700  | 0.256606  |
| H  | 5.988980  | 1.254148  | 0.271672  |
| C  | 3.225002  | -1.663803 | -2.105327 |
| H  | 2.307857  | -2.225394 | -1.901356 |
| C  | -2.955521 | -0.781253 | -3.332250 |
| H  | -3.837681 | -0.182832 | -3.586119 |
| H  | -2.705967 | -1.400375 | -4.200330 |
| H  | -2.118630 | -0.100851 | -3.146855 |
| C  | 2.955561  | -0.781242 | -3.332347 |
| H  | 2.118673  | -0.100823 | -3.147000 |
| H  | 2.706011  | -1.400416 | -4.200392 |
| H  | 3.837726  | -0.182843 | -3.586245 |
| C  | 2.287922  | -0.853235 | 3.579401  |
| H  | 2.164128  | -1.867718 | 3.192099  |
| H  | 1.596919  | -0.731695 | 4.420051  |
| H  | 3.310113  | -0.755735 | 3.961663  |
| C  | 4.335792  | -2.682772 | -2.397031 |
| H  | 5.261063  | -2.187879 | -2.710155 |
| H  | 4.030918  | -3.353053 | -3.206972 |
| H  | 4.568063  | -3.290037 | -1.516524 |
| C  | -4.335764 | -2.682839 | -2.397069 |
| H  | -4.568075 | -3.290136 | -1.516594 |
| H  | -4.030858 | -3.353090 | -3.207021 |
| H  | -5.261022 | -2.187935 | -2.710216 |
| Ca | -0.000213 | 5.017573  | -0.488153 |
| H  | -0.000246 | 6.327734  | -2.174572 |
| H  | -0.000222 | 4.982254  | 1.664263  |

88

|    |           |           |           |
|----|-----------|-----------|-----------|
| C3 |           |           |           |
| Al | 0.000006  | 0.060227  | -0.208299 |
| N  | -1.419068 | -1.194609 | 0.074971  |
| N  | 1.419036  | -1.194629 | 0.074976  |
| C  | -0.000030 | -3.128371 | 0.279254  |
| H  | -0.000042 | -4.204836 | 0.397445  |
| C  | -1.256126 | -2.510386 | 0.233295  |
| C  | -2.738346 | -0.617704 | 0.140595  |
| C  | 1.256074  | -2.510405 | 0.233344  |
| C  | 2.738313  | -0.617725 | 0.140615  |
| C  | -3.143127 | -0.032014 | 1.356461  |
| C  | -3.543911 | -0.570941 | -1.008527 |
| C  | -2.457332 | -3.416828 | 0.337880  |
| H  | -3.331591 | -2.905561 | 0.741378  |
| H  | -2.227874 | -4.286570 | 0.955479  |
| H  | -2.716212 | -3.775717 | -0.663894 |
| C  | 0.000011  | 1.848187  | 0.799297  |
| H  | -0.000008 | 2.002578  | 1.875540  |
| C  | -1.229136 | 2.350080  | 0.090545  |
| H  | -2.063301 | 2.790662  | 0.629525  |
| C  | -1.228274 | 2.131242  | -1.243840 |
| H  | -2.056832 | 2.387622  | -1.897627 |
| C  | 2.457265  | -3.416854 | 0.338017  |
| H  | 2.716308  | -3.775621 | -0.663760 |
| H  | 2.227716  | -4.286669 | 0.955477  |
| H  | 3.331457  | -2.905631 | 0.741715  |

|   |           |           |           |
|---|-----------|-----------|-----------|
| C | -2.280372 | -0.122815 | 2.608875  |
| H | -1.238785 | -0.220679 | 2.289379  |
| C | 3.143056  | -0.031997 | 1.356470  |
| C | 3.543912  | -0.570990 | -1.008487 |
| C | -5.179634 | 0.695210  | 0.259404  |
| H | -6.130614 | 1.216660  | 0.303092  |
| C | 1.228365  | 2.131208  | -1.243796 |
| H | 2.056956  | 2.387556  | -1.897553 |
| C | 1.229200  | 2.350035  | 0.090590  |
| H | 2.063357  | 2.790599  | 0.629599  |
| C | -4.376958 | 0.616395  | 1.392077  |
| H | -4.713716 | 1.079550  | 2.313650  |
| C | 0.000041  | 1.416470  | -1.749811 |
| H | 0.000063  | 1.217334  | -2.819400 |
| C | -4.765127 | 0.102324  | -0.924666 |
| H | -5.402720 | 0.162213  | -1.802059 |
| C | 2.280272  | -0.122753 | 2.608866  |
| H | 1.238686  | -0.220580 | 2.289353  |
| C | -2.623828 | -1.380386 | 3.421860  |
| H | -3.675355 | -1.365694 | 3.729148  |
| H | -2.005396 | -1.431310 | 4.324086  |
| H | -2.452076 | -2.294530 | 2.847191  |
| C | 4.765132  | 0.102263  | -0.924608 |
| H | 5.402751  | 0.162120  | -1.801985 |
| C | 2.359094  | 1.123907  | 3.496257  |
| H | 3.325060  | 1.203665  | 4.005971  |
| H | 1.589153  | 1.073039  | 4.272415  |
| H | 2.199836  | 2.042032  | 2.924373  |
| C | -2.359145 | 1.123844  | 3.496266  |
| H | -2.199782 | 2.041961  | 2.924395  |
| H | -1.589241 | 1.072914  | 4.272459  |
| H | -3.325126 | 1.203677  | 4.005940  |
| C | 4.376906  | 0.616378  | 1.392115  |
| H | 4.713649  | 1.079536  | 2.313693  |
| C | -3.150518 | -1.241679 | -2.317541 |
| H | -2.198778 | -1.759089 | -2.163109 |
| C | 5.179619  | 0.695158  | 0.259467  |
| H | 6.130608  | 1.216588  | 0.303180  |
| C | 3.150575  | -1.241802 | -2.317484 |
| H | 2.198878  | -1.759285 | -2.163032 |
| C | -2.937888 | -0.228066 | -3.449603 |
| H | -3.848797 | 0.349084  | -3.640912 |
| H | -2.669808 | -0.746201 | -4.376035 |
| H | -2.137559 | 0.473919  | -3.211389 |
| C | 2.937858  | -0.228258 | -3.449593 |
| H | 2.137462  | 0.473664  | -3.211414 |
| H | 2.669822  | -0.746460 | -4.375999 |
| H | 3.848714  | 0.348965  | -3.640930 |
| C | 2.623664  | -1.380346 | 3.421847  |
| H | 2.451918  | -2.294473 | 2.847148  |
| H | 2.005196  | -1.431274 | 4.324047  |
| H | 3.675179  | -1.365684 | 3.729177  |
| C | 4.193870  | -2.290073 | -2.736443 |
| H | 5.135780  | -1.813782 | -3.028196 |
| H | 3.833304  | -2.862555 | -3.597109 |

|    |           |           |           |
|----|-----------|-----------|-----------|
| H  | 4.417790  | -2.988991 | -1.925314 |
| C  | -4.193714 | -2.290034 | -2.736542 |
| H  | -4.417547 | -2.989016 | -1.925445 |
| H  | -3.833098 | -2.862436 | -3.597243 |
| H  | -5.135676 | -1.813827 | -3.028261 |
| Ca | 0.000084  | 4.855080  | -0.890227 |
| H  | -0.000115 | 5.335514  | -2.979075 |
| H  | 0.000280  | 5.721490  | 1.072932  |

88

|    |           |           |           |
|----|-----------|-----------|-----------|
| C4 |           |           |           |
| Al | 0.000003  | -0.007444 | -0.486945 |
| N  | 1.426669  | 0.095414  | 0.786486  |
| N  | -1.426669 | 0.095412  | 0.786499  |
| C  | 0.000005  | 0.030246  | 2.727254  |
| H  | 0.000007  | -0.053075 | 3.806471  |
| C  | 1.253206  | 0.057940  | 2.114103  |
| C  | 2.747221  | 0.316497  | 0.253881  |
| C  | -1.253205 | 0.057921  | 2.114107  |
| C  | -2.747222 | 0.316471  | 0.253888  |
| C  | 3.615521  | -0.763757 | 0.032890  |
| C  | 3.109154  | 1.633852  | -0.089796 |
| C  | 2.445559  | -0.008013 | 3.033374  |
| H  | 3.336484  | 0.455133  | 2.608738  |
| H  | 2.667071  | -1.065103 | 3.220034  |
| H  | 2.216980  | 0.458164  | 3.992894  |
| C  | 0.000035  | -1.328756 | -2.131066 |
| H  | 0.000093  | -2.404653 | -2.344339 |
| C  | 1.229852  | -0.678963 | -2.733438 |
| H  | 2.030988  | -1.264936 | -3.171533 |
| C  | 1.226507  | 0.663175  | -2.684092 |
| H  | 2.048053  | 1.275338  | -3.043029 |
| C  | -2.445548 | -0.008049 | 3.033389  |
| H  | -2.217000 | 0.458223  | 3.992871  |
| H  | -2.666964 | -1.065146 | 3.220130  |
| H  | -3.336509 | 0.454993  | 2.608719  |
| C  | 3.267996  | -2.183533 | 0.452371  |
| H  | 2.316212  | -2.153138 | 0.996203  |
| C  | -3.615486 | -0.763798 | 0.032821  |
| C  | -3.109183 | 1.633832  | -0.089728 |
| C  | 5.216441  | 0.779600  | -0.933973 |
| H  | 6.177598  | 0.959336  | -1.405282 |
| C  | -1.226570 | 0.663070  | -2.684161 |
| H  | -2.048141 | 1.275163  | -3.043158 |
| C  | -1.229798 | -0.679066 | -2.733510 |
| H  | -2.030852 | -1.265111 | -3.171659 |
| C  | 4.847605  | -0.508430 | -0.572859 |
| H  | 5.531970  | -1.331108 | -0.760348 |
| C  | -0.000074 | 1.263012  | -2.055949 |
| H  | -0.000118 | 2.348418  | -1.982626 |
| C  | 4.354825  | 1.840977  | -0.681221 |
| H  | 4.657298  | 2.845993  | -0.957201 |
| C  | -3.267957 | -2.183578 | 0.452290  |
| H  | -2.316224 | -2.153169 | 0.996208  |
| C  | 4.312795  | -2.769417 | 1.412929  |

|    |           |           |           |
|----|-----------|-----------|-----------|
| H  | 5.268502  | -2.941835 | 0.906649  |
| H  | 3.966117  | -3.729128 | 1.809064  |
| H  | 4.500475  | -2.098867 | 2.255877  |
| C  | -4.354832 | 1.840947  | -0.681205 |
| H  | -4.657329 | 2.845967  | -0.957140 |
| C  | -3.100469 | -3.106303 | -0.763712 |
| H  | -4.032416 | -3.189938 | -1.331486 |
| H  | -2.834565 | -4.127915 | -0.460310 |
| H  | -2.356841 | -2.721499 | -1.470831 |
| C  | 3.100644  | -3.106294 | -0.763622 |
| H  | 2.357062  | -2.721535 | -1.470815 |
| H  | 2.834756  | -4.127908 | -0.460217 |
| H  | 4.032645  | -3.189903 | -1.331312 |
| C  | -4.847547 | -0.508482 | -0.572980 |
| H  | -5.531883 | -1.331170 | -0.760529 |
| C  | 2.190826  | 2.811680  | 0.207088  |
| H  | 1.165629  | 2.433800  | 0.239133  |
| C  | -5.216400 | 0.779555  | -0.934055 |
| H  | -6.177540 | 0.959285  | -1.405400 |
| C  | -2.190911 | 2.811664  | 0.207316  |
| H  | -1.165712 | 2.433792  | 0.239431  |
| C  | 2.232376  | 3.901268  | -0.869173 |
| H  | 3.173577  | 4.461104  | -0.850209 |
| H  | 1.425459  | 4.620994  | -0.697640 |
| H  | 2.106001  | 3.481220  | -1.870959 |
| C  | -2.232364 | 3.901335  | -0.868864 |
| H  | -2.105885 | 3.481375  | -1.870676 |
| H  | -1.425471 | 4.621055  | -0.697193 |
| H  | -3.173570 | 4.461166  | -0.849944 |
| C  | -4.312825 | -2.769519 | 1.412738  |
| H  | -4.500597 | -2.098998 | 2.255688  |
| H  | -3.966156 | -3.729231 | 1.808876  |
| H  | -5.268482 | -2.941945 | 0.906366  |
| C  | -2.496076 | 3.408289  | 1.589512  |
| H  | -3.529703 | 3.769114  | 1.634906  |
| H  | -1.829575 | 4.252347  | 1.796389  |
| H  | -2.359585 | 2.671326  | 2.385467  |
| C  | 2.495858  | 3.408418  | 1.589265  |
| H  | 2.359293  | 2.671520  | 2.385267  |
| H  | 1.829329  | 4.252488  | 1.796008  |
| H  | 3.529478  | 3.769253  | 1.634729  |
| Ca | 0.000008  | -3.579323 | -0.229353 |
| H  | 0.000056  | -2.885742 | 1.792790  |
| H  | 0.000014  | -5.300803 | -1.473494 |

88

|    |           |           |           |
|----|-----------|-----------|-----------|
| C5 |           |           |           |
| Al | 0.000074  | -0.628473 | -0.234620 |
| N  | 1.419303  | 0.292017  | 0.816840  |
| N  | -1.419308 | 0.291877  | 0.816994  |
| C  | 0.000070  | 0.567993  | 2.739726  |
| H  | 0.000130  | 0.754901  | 3.806378  |
| C  | 1.252108  | 0.547522  | 2.113243  |
| C  | -1.252052 | 0.547287  | 2.113405  |
| C  | 2.733535  | 0.452358  | 0.265276  |

|   |           |           |           |
|---|-----------|-----------|-----------|
| C | -2.733476 | 0.452639  | 0.265428  |
| C | 3.670923  | -0.594268 | 0.338818  |
| C | -3.671079 | -0.593833 | 0.338526  |
| C | 3.039843  | 1.665530  | -0.381989 |
| C | -3.039489 | 1.666066  | -0.381470 |
| C | 2.437513  | 0.824468  | 3.011424  |
| C | -2.437420 | 0.823894  | 3.011727  |
| H | 2.793120  | -0.124388 | 3.425786  |
| H | -2.144081 | 1.462223  | 3.846565  |
| H | 2.144184  | 1.463205  | 3.845953  |
| H | -3.270103 | 1.287516  | 2.482637  |
| H | 3.270205  | 1.287803  | 2.482105  |
| H | -2.793071 | -0.125150 | 3.425618  |
| C | -1.274977 | -1.082398 | -1.980486 |
| H | -2.361288 | -1.068542 | -1.944117 |
| C | -0.680799 | -2.106752 | -2.879266 |
| C | -0.676992 | 0.254107  | -2.300975 |
| H | -1.285530 | -2.717494 | -3.548054 |
| H | -1.289352 | 1.115261  | -2.539861 |
| C | 0.679870  | -2.107237 | -2.879355 |
| C | 0.677775  | 0.253598  | -2.301073 |
| H | 1.284092  | -2.718390 | -3.548224 |
| H | 1.290725  | 1.114279  | -2.540127 |
| C | 3.364088  | -1.912308 | 1.038644  |
| C | -3.364432 | -1.912195 | 1.037801  |
| H | 2.365566  | -1.833419 | 1.478495  |
| H | -2.365848 | -1.833632 | 1.477578  |
| C | 5.237636  | 0.779614  | -0.903150 |
| C | -5.237471 | 0.780826  | -0.902985 |
| H | 6.212721  | 0.905673  | -1.363322 |
| H | -6.212524 | 0.907247  | -1.363126 |
| C | 4.920343  | -0.407039 | -0.255534 |
| C | -4.920434 | -0.406138 | -0.255786 |
| H | 5.657090  | -1.204755 | -0.214460 |
| H | -5.657345 | -1.203719 | -0.215046 |
| C | 1.274833  | -1.083316 | -1.980532 |
| H | 2.361167  | -1.070172 | -1.944305 |
| C | 4.302234  | 1.806864  | -0.960262 |
| C | -4.301845 | 1.807879  | -0.959733 |
| H | 4.560915  | 2.730125  | -1.468430 |
| H | -4.560296 | 2.731378  | -1.467587 |
| C | 4.363446  | -2.209008 | 2.167241  |
| C | -4.363749 | -2.209116 | 2.166391  |
| H | 5.363116  | -2.409742 | 1.767127  |
| H | -5.363505 | -2.409404 | 1.766272  |
| H | 4.049130  | -3.092860 | 2.731671  |
| H | -4.049625 | -3.093286 | 2.730431  |
| H | 4.452369  | -1.370365 | 2.862508  |
| H | -4.452374 | -1.370738 | 2.862013  |
| C | -3.343108 | -3.094736 | 0.056090  |
| C | 3.342443  | -3.095194 | 0.057357  |
| H | -4.342398 | -3.303740 | -0.340477 |
| H | 4.341663  | -3.304507 | -0.339241 |
| H | -2.994783 | -4.007369 | 0.554794  |
| H | 2.993993  | -4.007596 | 0.556383  |

|    |           |           |           |
|----|-----------|-----------|-----------|
| H  | -2.710017 | -2.876312 | -0.809673 |
| H  | 2.709302  | -2.876929 | -0.808396 |
| C  | 2.024342  | 2.800953  | -0.425045 |
| C  | -2.023758 | 2.801288  | -0.424125 |
| H  | 1.033903  | 2.337681  | -0.451628 |
| H  | -1.033399 | 2.337829  | -0.450452 |
| C  | 2.152376  | 3.693150  | -1.664258 |
| C  | -2.151252 | 3.693691  | -1.663239 |
| H  | 3.044247  | 4.327939  | -1.619154 |
| H  | -3.042938 | 4.328747  | -1.618245 |
| H  | 1.286075  | 4.359007  | -1.728815 |
| H  | -1.284735 | 4.359297  | -1.727505 |
| H  | 2.200982  | 3.111860  | -2.590052 |
| H  | -2.199840 | 3.112554  | -2.589129 |
| C  | -2.084335 | 3.666281  | 0.844133  |
| C  | 2.084669  | 3.666126  | 0.843085  |
| H  | -3.085840 | 4.091208  | 0.975957  |
| H  | 3.086201  | 4.090901  | 0.975193  |
| H  | -1.369988 | 4.493440  | 0.770676  |
| H  | 1.370503  | 4.493409  | 0.769230  |
| H  | -1.833716 | 3.094316  | 1.740008  |
| H  | 1.833606  | 3.094381  | 1.738975  |
| Ca | -0.000547 | -3.600672 | -0.702855 |
| H  | -0.000080 | -2.005267 | 0.816889  |
| H  | -0.000600 | -5.699657 | -0.443808 |

88

|     |           |           |           |
|-----|-----------|-----------|-----------|
| C6* |           |           |           |
| Al  | -0.033007 | 0.441247  | -0.278403 |
| N   | 1.432382  | -0.519834 | -1.020884 |
| N   | -1.393117 | -0.679067 | -1.052073 |
| C   | 0.072299  | -1.584390 | -2.713678 |
| H   | 0.107492  | -2.154648 | -3.633196 |
| C   | 1.304010  | -1.233447 | -2.151120 |
| C   | -1.204069 | -1.406487 | -2.142137 |
| C   | 2.741211  | -0.416494 | -0.428936 |
| C   | -2.677908 | -0.590084 | -0.415540 |
| C   | 3.613146  | 0.616015  | -0.813319 |
| C   | -3.633649 | 0.333828  | -0.870282 |
| C   | 3.111830  | -1.368481 | 0.543570  |
| C   | -2.897571 | -1.376655 | 0.732529  |
| C   | 2.545483  | -1.714896 | -2.861306 |
| C   | -2.367173 | -2.072009 | -2.832102 |
| H   | 3.110577  | -0.861777 | -3.245077 |
| H   | -3.178188 | -2.298014 | -2.138176 |
| H   | 2.287143  | -2.367991 | -3.694843 |
| H   | -2.762636 | -1.393582 | -3.595623 |
| H   | 3.210300  | -2.251495 | -2.180318 |
| H   | -2.047809 | -2.988872 | -3.330040 |
| C   | -1.212812 | 2.605685  | 3.002973  |
| H   | -1.990828 | 3.348665  | 3.183331  |
| C   | -1.288057 | 1.764571  | 1.884232  |
| C   | -0.185856 | 2.441335  | 3.936597  |
| H   | -2.194420 | 1.740287  | 1.280396  |
| H   | -0.110166 | 3.101596  | 4.793985  |

|   |           |           |           |
|---|-----------|-----------|-----------|
| C | -0.181651 | 0.837414  | 1.612438  |
| C | 0.523149  | 1.205009  | 3.914001  |
| H | 0.959221  | 1.588885  | 1.018922  |
| H | 1.093478  | 0.911556  | 4.792451  |
| C | 3.180113  | 1.743405  | -1.739264 |
| C | -3.391611 | 1.243400  | -2.065749 |
| H | 2.157384  | 1.538246  | -2.068228 |
| H | -2.412580 | 0.999783  | -2.488494 |
| C | 5.303639  | -0.329437 | 0.643824  |
| C | -5.086886 | -0.358619 | 0.945461  |
| H | 6.308255  | -0.304353 | 1.054210  |
| H | -6.029041 | -0.268276 | 1.476963  |
| C | 4.898905  | 0.634313  | -0.267887 |
| C | -4.840067 | 0.427602  | -0.170730 |
| H | 5.589947  | 1.421953  | -0.554870 |
| H | -5.594967 | 1.134890  | -0.502406 |
| C | 0.453376  | 0.367603  | 2.834830  |
| H | 0.959234  | -0.592417 | 2.854794  |
| C | 4.408464  | -1.310488 | 1.055734  |
| C | -4.118442 | -1.250535 | 1.392710  |
| H | 4.725736  | -2.033993 | 1.798751  |
| H | -4.312412 | -1.844078 | 2.279756  |
| C | 4.058471  | 1.875582  | -2.990500 |
| C | -4.447942 | 1.040948  | -3.161958 |
| H | 5.094581  | 2.111256  | -2.725856 |
| H | -5.436594 | 1.370545  | -2.825264 |
| H | 3.686759  | 2.684140  | -3.627873 |
| H | -4.190008 | 1.624569  | -4.051511 |
| H | 4.069757  | 0.957328  | -3.584152 |
| H | -4.534131 | -0.010208 | -3.452239 |
| C | -3.344933 | 2.716654  | -1.637000 |
| C | 3.166170  | 3.073286  | -0.966758 |
| H | -4.309812 | 3.045426  | -1.236487 |
| H | 4.181525  | 3.446094  | -0.795306 |
| H | -3.092941 | 3.358687  | -2.486748 |
| H | 2.616156  | 3.848363  | -1.511731 |
| H | -2.589071 | 2.867899  | -0.861553 |
| H | 2.720582  | 2.920485  | 0.023801  |
| C | 2.126099  | -2.422906 | 1.037430  |
| C | -1.836107 | -2.346807 | 1.226271  |
| H | 1.139453  | -1.948244 | 1.052522  |
| H | -0.868660 | -1.943866 | 0.916451  |
| C | 2.420585  | -2.899118 | 2.464763  |
| C | -1.793025 | -2.473969 | 2.750817  |
| H | 3.295904  | -3.557295 | 2.499356  |
| H | -2.666647 | -3.004996 | 3.144948  |
| H | 1.569274  | -3.474436 | 2.841459  |
| H | -0.907168 | -3.046295 | 3.045582  |
| H | 2.595479  | -2.063956 | 3.148976  |
| H | -1.731085 | -1.490382 | 3.224537  |
| C | -1.987205 | -3.721525 | 0.559831  |
| C | 2.028851  | -3.640638 | 0.105212  |
| H | -2.963040 | -4.161095 | 0.794945  |
| H | 3.017133  | -4.087820 | -0.050937 |
| H | -1.209945 | -4.405375 | 0.917466  |



|    |           |           |           |
|----|-----------|-----------|-----------|
| H  | 1.380816  | -4.401531 | 0.552877  |
| H  | -1.898313 | -3.654720 | -0.528619 |
| H  | 1.604235  | -3.385941 | -0.867831 |
| Ca | 0.148129  | 3.630928  | 0.695769  |
| H  | -0.280556 | 1.909284  | -0.997202 |
| H  | 0.257220  | 5.645290  | 0.062918  |

73

LAI'

|    |           |           |           |
|----|-----------|-----------|-----------|
| Al | -0.000002 | -0.224876 | -0.978596 |
| N  | -1.389161 | -0.137133 | 0.451449  |
| N  | 1.389159  | -0.137144 | 0.451450  |
| C  | -0.000002 | -0.204400 | 2.408410  |
| H  | -0.000002 | -0.231891 | 3.490488  |
| C  | -1.249421 | -0.160683 | 1.777638  |
| C  | -2.714730 | -0.010850 | -0.092265 |
| C  | 1.249418  | -0.160697 | 1.777638  |
| C  | 2.714731  | -0.010874 | -0.092261 |
| C  | -3.217721 | 1.274513  | -0.367307 |
| C  | -3.453079 | -1.166898 | -0.404298 |
| C  | -2.474853 | -0.124989 | 2.657682  |
| H  | -3.053317 | 0.784734  | 2.472344  |
| H  | -2.201545 | -0.161352 | 3.712738  |
| H  | -3.134642 | -0.967624 | 2.432232  |
| C  | 2.474850  | -0.125011 | 2.657684  |
| H  | 3.134667  | -0.967614 | 2.432193  |
| H  | 2.201543  | -0.161431 | 3.712739  |
| H  | 3.053284  | 0.784740  | 2.472390  |
| C  | -2.422910 | 2.534595  | -0.053604 |
| H  | -1.526942 | 2.239478  | 0.500519  |
| C  | 3.217753  | 1.274488  | -0.367260 |
| C  | 3.453053  | -1.166928 | -0.404337 |
| C  | -5.218530 | 0.249672  | -1.277963 |
| H  | -6.193459 | 0.350735  | -1.744691 |
| C  | -4.476113 | 1.380254  | -0.961984 |
| H  | -4.879448 | 2.363272  | -1.188299 |
| C  | -4.706280 | -1.010951 | -0.999188 |
| H  | -5.289216 | -1.891161 | -1.255028 |
| C  | 2.422968  | 2.534575  | -0.053514 |
| H  | 1.527023  | 2.239462  | 0.500649  |
| C  | -3.208479 | 3.507596  | 0.835908  |
| H  | -4.089481 | 3.903729  | 0.319823  |
| H  | -2.578143 | 4.358626  | 1.113695  |
| H  | -3.551330 | 3.023639  | 1.755935  |
| C  | 4.706256  | -1.010990 | -0.999225 |
| H  | 5.289170  | -1.891206 | -1.255095 |
| C  | 1.957148  | 3.223888  | -1.343879 |
| H  | 2.813062  | 3.558577  | -1.940435 |
| H  | 1.343165  | 4.100359  | -1.110441 |
| H  | 1.363595  | 2.542016  | -1.961101 |
| C  | -1.957145 | 3.223900  | -1.343993 |
| H  | -1.363629 | 2.542020  | -1.961240 |
| H  | -1.343140 | 4.100364  | -1.110586 |
| H  | -2.813082 | 3.558600  | -1.940510 |
| C  | 4.476143  | 1.380218  | -0.961938 |

|   |           |           |           |
|---|-----------|-----------|-----------|
| H | 4.879502  | 2.363235  | -1.188222 |
| C | -2.914066 | -2.563830 | -0.133003 |
| H | -1.995620 | -2.461886 | 0.452765  |
| C | 5.218533  | 0.249630  | -1.277958 |
| H | 6.193463  | 0.350685  | -1.744686 |
| C | 2.914011  | -2.563857 | -0.133082 |
| H | 1.995547  | -2.461910 | 0.452658  |
| C | -2.545971 | -3.271173 | -1.445399 |
| H | -3.432880 | -3.414192 | -2.072845 |
| H | -2.112176 | -4.256149 | -1.241825 |
| H | -1.819872 | -2.685235 | -2.017505 |
| C | 2.545952  | -3.271175 | -1.445501 |
| H | 1.819883  | -2.685218 | -2.017625 |
| H | 2.112132  | -4.256147 | -1.241957 |
| H | 3.432880  | -3.414203 | -2.072917 |
| C | 3.208582  | 3.507568  | 0.835965  |
| H | 3.551489  | 3.023601  | 1.755967  |
| H | 2.578258  | 4.358592  | 1.113797  |
| H | 4.089553  | 3.903713  | 0.319835  |
| C | 3.890284  | -3.414400 | 0.690959  |
| H | 4.806265  | -3.632509 | 0.131728  |
| H | 3.428462  | -4.372118 | 0.951902  |
| H | 4.179988  | -2.911801 | 1.619314  |
| C | -3.890376 | -3.414349 | 0.691019  |
| H | -4.180120 | -2.911723 | 1.619347  |
| H | -3.428567 | -4.372061 | 0.952007  |
| H | -4.806332 | -3.632473 | 0.131755  |

85

Uncatalyzed1

|    |           |           |           |
|----|-----------|-----------|-----------|
| Al | -0.186579 | -0.193472 | 0.607696  |
| N  | 0.982332  | -1.108968 | -0.746328 |
| N  | -1.759533 | -0.699002 | -0.532770 |
| C  | -0.695404 | -2.185005 | -2.087005 |
| H  | -0.863651 | -2.882480 | -2.897762 |
| C  | 0.635202  | -1.954590 | -1.718788 |
| C  | 2.371992  | -0.773524 | -0.606554 |
| C  | -1.822555 | -1.527912 | -1.573279 |
| C  | -2.964182 | -0.040659 | -0.108387 |
| C  | 2.911699  | 0.221557  | -1.447166 |
| C  | 3.150905  | -1.384806 | 0.390511  |
| C  | 1.706989  | -2.671062 | -2.505345 |
| H  | 2.244907  | -1.966436 | -3.147805 |
| H  | 1.273459  | -3.450020 | -3.133893 |
| H  | 2.447541  | -3.118070 | -1.837212 |
| C  | 1.582044  | 3.451212  | 1.443615  |
| H  | 1.406968  | 4.106511  | 0.594908  |
| C  | 2.663568  | 2.572443  | 1.433937  |
| H  | 3.330415  | 2.532125  | 0.578630  |
| C  | 2.880398  | 1.723269  | 2.516233  |
| H  | 3.713531  | 1.027784  | 2.494948  |
| C  | -3.148564 | -1.791383 | -2.245529 |
| H  | -3.838935 | -2.282247 | -1.553307 |
| H  | -3.023368 | -2.425297 | -3.124029 |
| H  | -3.621431 | -0.852538 | -2.546820 |

|   |           |           |           |
|---|-----------|-----------|-----------|
| C | 2.065414  | 0.904419  | -2.513845 |
| H | 1.187117  | 0.281226  | -2.702819 |
| C | -3.217065 | 1.271147  | -0.549157 |
| C | -3.831741 | -0.687044 | 0.793227  |
| C | 5.021703  | 0.013775  | -0.269715 |
| H | 6.053144  | 0.324387  | -0.134255 |
| C | 0.931187  | 2.627033  | 3.615883  |
| H | 0.248026  | 2.637889  | 4.459531  |
| C | 0.714851  | 3.477834  | 2.533711  |
| H | -0.135503 | 4.153320  | 2.535459  |
| C | 4.240653  | 0.599539  | -1.260124 |
| H | 4.673787  | 1.369538  | -1.891711 |
| C | 2.014694  | 1.751469  | 3.607441  |
| H | 2.176219  | 1.080013  | 4.445645  |
| C | 4.477221  | -0.971645 | 0.541433  |
| H | 5.093725  | -1.430295 | 1.309842  |
| C | -2.268869 | 2.013578  | -1.480700 |
| H | -1.422926 | 1.354672  | -1.699925 |
| C | 2.800058  | 1.063007  | -3.850276 |
| H | 3.623755  | 1.781406  | -3.782472 |
| H | 2.109014  | 1.432552  | -4.614621 |
| H | 3.214409  | 0.110551  | -4.196226 |
| C | -4.971826 | -0.005336 | 1.219862  |
| H | -5.650727 | -0.484589 | 1.919149  |
| C | -1.708365 | 3.272009  | -0.803514 |
| H | -2.506597 | 3.981073  | -0.558542 |
| H | -1.001009 | 3.780528  | -1.466928 |
| H | -1.185462 | 3.014133  | 0.123191  |
| C | 1.548242  | 2.256647  | -2.007404 |
| H | 0.992612  | 2.141804  | -1.071474 |
| H | 0.885827  | 2.717424  | -2.748670 |
| H | 2.379726  | 2.945124  | -1.816354 |
| C | -4.375531 | 1.909697  | -0.100720 |
| H | -4.591639 | 2.920331  | -0.436005 |
| C | 2.601171  | -2.481115 | 1.290129  |
| H | 1.570156  | -2.679919 | 0.982196  |
| C | -5.251355 | 1.280396  | 0.772986  |
| H | -6.145131 | 1.793794  | 1.113827  |
| C | -3.532121 | -2.075105 | 1.340932  |
| H | -2.720618 | -2.505616 | 0.746950  |
| C | 2.565335  | -2.035128 | 2.757897  |
| H | 3.574406  | -1.826854 | 3.132451  |
| H | 2.130509  | -2.821391 | 3.384173  |
| H | 1.962544  | -1.129696 | 2.872463  |
| C | -3.035569 | -1.981432 | 2.791603  |
| H | -2.152281 | -1.338986 | 2.864003  |
| H | -2.773903 | -2.974351 | 3.173194  |
| H | -3.812567 | -1.560927 | 3.439991  |
| C | -2.936177 | 2.354152  | -2.819930 |
| H | -3.314389 | 1.455446  | -3.317380 |
| H | -2.217460 | 2.836756  | -3.490777 |
| H | -3.778874 | 3.040627  | -2.683208 |
| C | -4.731855 | -3.025921 | 1.236109  |
| H | -5.550078 | -2.720028 | 1.896544  |
| H | -4.435860 | -4.038007 | 1.530180  |

|   |           |           |          |
|---|-----------|-----------|----------|
| H | -5.127411 | -3.069107 | 0.216186 |
| C | 3.387866  | -3.789854 | 1.130286 |
| H | 3.412850  | -4.119305 | 0.086671 |
| H | 2.927393  | -4.584126 | 1.726816 |
| H | 4.423631  | -3.677773 | 1.468746 |

85

Uncatalyzed2\*

|    |           |           |           |
|----|-----------|-----------|-----------|
| Al | -0.000002 | 0.451331  | 0.322012  |
| N  | -1.415233 | 0.708664  | -0.895148 |
| N  | 1.415218  | 0.708661  | -0.895164 |
| C  | -0.000015 | 1.626057  | -2.612466 |
| H  | -0.000018 | 2.126888  | -3.571582 |
| C  | -1.259261 | 1.293303  | -2.081960 |
| C  | -2.711202 | 0.267854  | -0.450356 |
| C  | 1.259237  | 1.293297  | -2.081974 |
| C  | 2.711188  | 0.267849  | -0.450374 |
| C  | -3.109932 | -1.049452 | -0.735216 |
| C  | -3.494606 | 1.126186  | 0.340329  |
| C  | -2.484809 | 1.623047  | -2.891731 |
| H  | -3.087101 | 0.727961  | -3.066777 |
| H  | -2.215199 | 2.065517  | -3.850521 |
| H  | -3.117995 | 2.325233  | -2.339769 |
| C  | 0.000016  | -0.821016 | 1.784071  |
| H  | 0.000002  | -1.329354 | 0.538753  |
| C  | -1.224746 | -1.225855 | 2.454049  |
| H  | -2.186363 | -0.893578 | 2.071048  |
| C  | -1.196507 | -2.052920 | 3.560659  |
| H  | -2.146677 | -2.336316 | 4.009543  |
| C  | 2.484775  | 1.623043  | -2.891760 |
| H  | 3.117891  | 2.325342  | -2.339859 |
| H  | 2.215148  | 2.065396  | -3.850599 |
| H  | 3.087143  | 0.727989  | -3.066699 |
| C  | -2.231816 | -2.018289 | -1.512782 |
| H  | -1.280278 | -1.520239 | -1.721795 |
| C  | 3.109906  | -1.049465 | -0.735218 |
| C  | 3.494602  | 1.126185  | 0.340296  |
| C  | -5.148139 | -0.638201 | 0.514000  |
| H  | -6.101781 | -0.993235 | 0.891730  |
| C  | 1.196577  | -2.052918 | 3.560634  |
| H  | 2.146757  | -2.336311 | 4.009499  |
| C  | 1.224792  | -1.225856 | 2.454022  |
| H  | 2.186403  | -0.893589 | 2.070994  |
| C  | -4.347276 | -1.476420 | -0.250084 |
| H  | -4.680295 | -2.488958 | -0.457771 |
| C  | 0.000041  | -2.507654 | 4.130297  |
| H  | 0.000051  | -3.147878 | 5.005188  |
| C  | -4.717389 | 0.648361  | 0.812969  |
| H  | -5.336737 | 1.286898  | 1.435432  |
| C  | 2.231783  | -2.018305 | -1.512771 |
| H  | 1.280236  | -1.520265 | -1.721761 |
| C  | -2.863065 | -2.402011 | -2.858301 |
| H  | -3.817885 | -2.919248 | -2.714012 |
| H  | -2.198464 | -3.074351 | -3.410582 |
| H  | -3.050215 | -1.523740 | -3.484300 |

|   |           |           |           |
|---|-----------|-----------|-----------|
| C | 4.717386  | 0.648357  | 0.812933  |
| H | 5.336743  | 1.286898  | 1.435383  |
| C | 1.915913  | -3.266618 | -0.676872 |
| H | 2.817728  | -3.859815 | -0.489893 |
| H | 1.204693  | -3.904728 | -1.210757 |
| H | 1.481129  | -2.998716 | 0.290886  |
| C | -1.915916 | -3.266592 | -0.676882 |
| H | -1.481150 | -2.998682 | 0.290880  |
| H | -1.204674 | -3.904681 | -1.210762 |
| H | -2.817717 | -3.859814 | -0.489913 |
| C | 4.347252  | -1.476434 | -0.250092 |
| H | 4.680262  | -2.488976 | -0.457769 |
| C | -3.009838 | 2.509026  | 0.745997  |
| H | -2.137703 | 2.756631  | 0.131957  |
| C | 5.148126  | -0.638210 | 0.513975  |
| H | 6.101770  | -0.993247 | 0.891701  |
| C | 3.009851  | 2.509032  | 0.745959  |
| H | 2.137699  | 2.756634  | 0.131942  |
| C | -2.554047 | 2.495724  | 2.214117  |
| H | -3.398967 | 2.284852  | 2.878632  |
| H | -2.133565 | 3.467239  | 2.494264  |
| H | -1.793457 | 1.726915  | 2.393304  |
| C | 2.554109  | 2.495761  | 2.214095  |
| H | 1.793540  | 1.726943  | 2.393332  |
| H | 2.133620  | 3.467276  | 2.494231  |
| H | 3.399056  | 2.284922  | 2.878586  |
| C | 2.863010  | -2.402009 | -2.858306 |
| H | 3.050141  | -1.523729 | -3.484296 |
| H | 2.198403  | -3.074348 | -3.410583 |
| H | 3.817836  | -2.919241 | -2.714040 |
| C | 4.058795  | 3.600298  | 0.500001  |
| H | 4.933467  | 3.474740  | 1.146431  |
| H | 3.633012  | 4.585713  | 0.713785  |
| H | 4.407127  | 3.595629  | -0.537988 |
| C | -4.058781 | 3.600301  | 0.500085  |
| H | -4.407130 | 3.595658  | -0.537899 |
| H | -3.632990 | 4.585709  | 0.713885  |
| H | -4.933443 | 3.474732  | 1.146527  |

85

Uncatalyzed3

|    |           |           |           |
|----|-----------|-----------|-----------|
| Al | -0.039172 | -0.799693 | 0.696919  |
| N  | -1.386633 | -0.800367 | -0.688345 |
| N  | 1.424314  | -0.949127 | -0.539086 |
| C  | 0.034889  | -2.062087 | -2.157876 |
| H  | 0.041550  | -2.701933 | -3.030935 |
| C  | -1.214055 | -1.517379 | -1.791623 |
| C  | -2.657426 | -0.197647 | -0.402761 |
| C  | 1.283456  | -1.719934 | -1.622858 |
| C  | 2.707637  | -0.377028 | -0.251772 |
| C  | -3.668549 | -0.957117 | 0.211171  |
| C  | -2.819948 | 1.177530  | -0.661621 |
| C  | -2.383157 | -1.783591 | -2.706266 |
| H  | -3.022147 | -2.556862 | -2.267947 |
| H  | -2.044047 | -2.128442 | -3.683450 |

|   |           |           |           |
|---|-----------|-----------|-----------|
| H | -3.001156 | -0.891736 | -2.831664 |
| C | -0.087757 | 0.876521  | 1.744953  |
| H | -0.190250 | -2.175185 | 1.500420  |
| C | -1.294321 | 1.271168  | 2.355196  |
| H | -2.185076 | 0.653268  | 2.253273  |
| C | -1.406445 | 2.452866  | 3.086237  |
| H | -2.358943 | 2.724188  | 3.533194  |
| C | 2.517000  | -2.246460 | -2.312671 |
| H | 3.193384  | -1.437759 | -2.597573 |
| H | 2.256733  | -2.822246 | -3.201005 |
| H | 3.071701  | -2.889690 | -1.621162 |
| C | -3.464911 | -2.409335 | 0.618610  |
| H | -2.520680 | -2.759153 | 0.191681  |
| C | 3.549311  | -0.979417 | 0.698686  |
| C | 3.067914  | 0.823687  | -0.894981 |
| C | -5.077145 | 1.017065  | 0.214136  |
| H | -6.025016 | 1.491634  | 0.448728  |
| C | 0.914993  | 2.916472  | 2.664419  |
| H | 1.789132  | 3.550972  | 2.783571  |
| C | 1.013042  | 1.730876  | 1.935325  |
| H | 1.979370  | 1.476438  | 1.506507  |
| C | -4.878706 | -0.324213 | 0.507390  |
| H | -5.673703 | -0.889704 | 0.984725  |
| C | -0.299209 | 3.284913  | 3.238394  |
| H | -0.380827 | 4.208567  | 3.804191  |
| C | -4.050221 | 1.759784  | -0.357916 |
| H | -4.206120 | 2.815710  | -0.549179 |
| C | 3.148105  | -2.248905 | 1.432504  |
| H | 2.245587  | -2.644941 | 0.957728  |
| C | -4.583015 | -3.326481 | 0.104172  |
| H | -5.538419 | -3.109834 | 0.593817  |
| H | -4.337578 | -4.372483 | 0.313323  |
| H | -4.734409 | -3.219108 | -0.974591 |
| C | 4.304060  | 1.392159  | -0.585739 |
| H | 4.605818  | 2.313838  | -1.075115 |
| C | 2.795879  | -1.936393 | 2.894228  |
| H | 3.673785  | -1.565392 | 3.435409  |
| H | 2.433779  | -2.836469 | 3.400919  |
| H | 2.013675  | -1.174070 | 2.964051  |
| C | -3.334443 | -2.521392 | 2.145035  |
| H | -2.502145 | -1.917291 | 2.516155  |
| H | -3.146892 | -3.560090 | 2.436047  |
| H | -4.252397 | -2.186505 | 2.641188  |
| C | 4.767788  | -0.361871 | 0.989942  |
| H | 5.427274  | -0.805466 | 1.730164  |
| C | -1.680346 | 2.009221  | -1.234082 |
| H | -0.749105 | 1.578660  | -0.853759 |
| C | 5.150365  | 0.809563  | 0.350245  |
| H | 6.103765  | 1.272611  | 0.585145  |
| C | 2.146920  | 1.518443  | -1.889042 |
| H | 1.192852  | 0.983992  | -1.894750 |
| C | -1.713696 | 3.465275  | -0.761296 |
| H | -2.559145 | 4.018015  | -1.185775 |
| H | -0.802579 | 3.978647  | -1.078689 |
| H | -1.768707 | 3.520045  | 0.330091  |

|   |           |           |           |
|---|-----------|-----------|-----------|
| C | 1.858503  | 2.965261  | -1.469699 |
| H | 1.409956  | 3.007128  | -0.473281 |
| H | 1.165502  | 3.428694  | -2.179329 |
| H | 2.770246  | 3.571978  | -1.459694 |
| C | 4.225161  | -3.337904 | 1.345863  |
| H | 4.499482  | -3.548053 | 0.306977  |
| H | 3.858353  | -4.265289 | 1.797003  |
| H | 5.137252  | -3.050393 | 1.879760  |
| C | 2.710006  | 1.475833  | -3.316723 |
| H | 3.669479  | 2.001457  | -3.378206 |
| H | 2.015575  | 1.959791  | -4.011546 |
| H | 2.866390  | 0.449812  | -3.661639 |
| C | -1.634633 | 1.928158  | -2.766307 |
| H | -1.475520 | 0.902962  | -3.112960 |
| H | -0.813237 | 2.539492  | -3.155543 |
| H | -2.569354 | 2.296821  | -3.203837 |

### 3. References

- [S1] M. Stender, R. J. Wright, B. E. Eichler, J. Prust, M. M. Olmstead, H. W. Roesky and P. P. Power, *J. Chem. Soc., Dalton Trans.*, 2001, 3465–3469.
- [S4] C. Cui, H. W. Roesky, H.-G. Schmidt, M. Noltemeyer, H. Hao and F. Cimpoesu, *Angew. Chem. Int. Ed.*, 2000, **39**, 4274–4276.
- [S3] A. S. S. Wilson, M. S. Hill, M. F. Mahon, C. Dinoi, L. Maron, *Science*, 2017, **358**, 1168-1171.
- [S4] S. P. Green, C. Jones, A. Stasch, *Angew. Chem. Int. Ed.*, 2008, **47**, 9079–90.
- [S5] J. Spielmann, D. Piesik, B. Wittkamp, G. Jansen, S. Harder, *Chem. Commun.*, 2009, 3455–3456
- [S6] T. N. Hooper, M. Garçon, A. J. P. White, M. R. Crimmin, *Chem. Sci.*, 2018, **9**, 5435-5440
- [S6] T. N. Hooper, M. Garçon, A. J. P. White, M. R. Crimmin, *Chem. Sci.*, 2018, **9**, 5435-5440
- [S7] Rigaku Oxford Diffraction, **2018**, CrysAlisPro Software system, version 1.171.39.46, Rigaku Corporation, Oxford, UK.
- [S8] O. V. Dolomanov, L. J. Bourhis, R.J. Gildea, J. A. K. Howard and H. Puschmann, *J. Appl. Cryst.*, 2009, **42**, 339–341.
- [S9] G. M. Sheldrick, *Acta Cryst. A*, 2015, **71**, 3–8.
- [S10] G. M. Sheldrick, *Acta Cryst. C*, 2015, **71**, 3–8.
- [S11] A. Thorn, B. Dittrich and G. M. Sheldrick, *Acta Cryst. A*, 2012, **68**, 448–451.
- [S12] M. J. Frisch, G. W. Trucks, H. B. Schlegel, G. E. Scuseria, M. A. Robb, J. R. Cheeseman, G. Scalmani, V. Barone, B. Mennucci, G. A. Petersson, H. Nakatsuji, M. Caricato, X. Li, P. H. Hratchian, A. F. Izmaylof, J. Bloino, G. Zheng, J. L. Sonnenberg, M. Hada, M. Ehara, K. Toyota, R. Fukuda, J. Hasegawa, M. Ishida, T. Makajima, Y. Honda, O. Kitao, H. Nakai, T. Vreven, J. A. Montgomery, J. E. Peralta, F. Ogilaro, M. Bearpark, J. J. Heyd, E. Brothers, K. N. Kudin, V. N. Staroverov, T. Keith, R. Kobayashi, J. Normand, K. Raghavachari, A. Rendell, J. C. Burant, S. S. Iyengar, J. Tomasi, M. Cossi, N. Rega, J. M. Millam, M. Klene, J. E. Knox, J. E. Cross, V. Bakken, C. Adamo, J. Jaramillo, R. Gomperts, R. E. Stratmann, O. Yazyev, A. J. Austin, R. Cammi, C. Pomelli, J. W. Ochterski, R. L. Martin, K. Morokuma, V. G. Zakrzewski, G. A. Voth, P. Salvador, J. J. Dannenberg, S. Dapprich, A. D. Daniels, O. Farkas, J. B. Foresman, J. V. Ortiz, J. Cioslowski, D. J. Fox, Gaussian, Gaussian, Inc., Wallingford CT, 2013.
- [S13] J. Chai, M. Head-gordon, *Phys. Chem. Chem. Phys.* 2008, 6615–6620.



- [S14] W. J. Hehre, L. Radom, P. v. R. Schleyer, J. A. Pople, *Ab Initio Molecular Orbital Theory* by W. J. Hehre, L. Radom, P. v. R. Schleyer, and J. A. Pople, John Wiley, New York, 548pp. Price: \$79.95 (1986), John Wiley, New York, 1986.
- [S15] T. Clark, J. Chandrasekhar, G. W. Spitznagel, P. v. R. Schleyer, *J. Comp. Chem.* 1983, 4, 294–301.
- [S16] E. F. Silva, H. F. Svendsen, K. M. Merz, *J. Phys. Chem. A* 2009, 6404–6409.
- [S17] A. E. Reed, R. B. Weinstock, F. Weinhold, *J. Chem. Phys.* 1985, 83, 735–746.
- [S18] N. van Eikema Hommes, *Molecule*, Erlangen, 2016.
- [S19] T. A. Keith, *AIMAll* (Version 17.01.25), TK Gristmill Software, Overland Park KS USA, 2017.
- [S20] R. F. W. Bader, *Chem. Rev.* 1991, 91, 893–928.
